# Supplementary material
Source: MDPI journal article supplement (https://www.mdpi.com/1999-4907/7/12/308)
Supplement: s1 [file s1]

## Sheet: Data
NUMBER	Reference	PAP_ID	Units	Reported	Level 1	Level 2	Level 3	Time	time cat	Species	Spp Group	MAT	MAP	Max Depth	Depth	MLD	Depth_Group	Horizon	Texture	Method	Order	Location	BG Group	CTRL	CTRL_Mg	TRT	TRT_Mg	DIFF	Effect	Var	Notes
1	Kraemer	1979.1	%	conc	clearcut		burn	26	21-40		C	5-7.5	500-750	10	0-10	10	Top	A	C			WA, USA	NW NAM	5.7	5.7	7.2	7.2	1.5	0.233615	1
2	Kraemer	1979.1	%	conc	clearcut		burn	26	21-40		C	5-7.5	500-750	10	0-10	10	Top	A	F		AND	WA, USA	NW NAM	14.7	14.7	14.4	14.4	-0.3	-0.0206193	1
3	DeByle	1980.2	%	conc	clearcut	sawlog	burn	5	0-5	Lodgepole	C	0-5	500-750	5	0-5	5	Top	A	F		ALF	WY, USA	SW NAM	5.2	5.2	5.9	5.9	0.7	0.126294	1
4	DeByle	1980.2	%	conc	clearcut	sawlog	burn	5	0-5	Lodgepole	C	0-5	500-750	5	0-5	5	Top	A	F		ALF	WY, USA	SW NAM	5.2	5.2	4.1	4.1	-1.1	-0.237672	1
5	DeByle	1980.2	%	conc	clearcut	sawlog	remove	5	0-5	Lodgepole	C	0-5	500-750	5	0-5	5	Top	A	F		ALF	WY, USA	SW NAM	5.2	5.2	4.6	4.6	-0.6	-0.122602	1
6	DeByle	1980.2	%	conc	clearcut	WTH	remove	5	0-5	Lodgepole	C	0-5	500-750	5	0-5	5	Top	A	F		ALF	WY, USA	SW NAM	5.2	5.2	5.9	5.9	0.7	0.126294	1
7	DeByle	1980.2	%	conc	clearcut	sawlog	retain	5	0-5	Lodgepole	C	0-5	500-750	5	0-5	5	Top	A	F		ALF	WY, USA	SW NAM	5.2	5.2	8.6	8.6	3.4	0.503104	1
8	DeByle	1980.2	%	conc	clearcut	sawlog	burn	1	0-5	Lodgepole	C	0-5	500-750	5	0-5	5	Top	A	F		ALF	WY, USA	SW NAM	6	6	6.9	6.9	0.9	0.139762	1
9	DeByle	1980.2	%	conc	clearcut	sawlog	burn	1	0-5	Lodgepole	C	0-5	500-750	5	0-5	5	Top	A	F		ALF	WY, USA	SW NAM	6	6	7.2	7.2	1.2	0.182322	1
10	DeByle	1980.2	%	conc	clearcut	WTH	remove	1	0-5	Lodgepole	C	0-5	500-750	5	0-5	5	Top	A	F		ALF	WY, USA	SW NAM	6	6	6.6	6.6	0.6	0.0953102	1
11	DeByle	1980.2	%	conc	clearcut	sawlog	remove	1	0-5	Lodgepole	C	0-5	500-750	5	0-5	5	Top	A	F		ALF	WY, USA	SW NAM	6	6	7.1	7.1	1.1	0.168335	1
12	DeByle	1980.2	%	conc	clearcut	sawlog	retain	1	0-5	Lodgepole	C	0-5	500-750	5	0-5	5	Top	A	F		ALF	WY, USA	SW NAM	6	6	7.1	7.1	1.1	0.168335	1
13	Ellis	1982.1	Mg ha-1	pool	clearcut		burn	1	0-5	Mix	H		1001-1400	10	0-10	10	Top	A	F	W-B		43S127E	PAC	47.9	47.9	47.4	47.4	-0.5	-0.0104933	1
14	Ellis	1982.1	Mg ha-1	pool	clearcut		burn	1	0-5	Mix	H		1001-1400	10	0-10	10	Top	A	F	W-B		43S127E	PAC	47.9	47.9	49.6	49.6	1.7	0.0348753	1
15	Ellis	1982.1	Mg ha-1	pool	clearcut		burn	3	0-5	Mix	H		1001-1400	10	0-10	10	Top	A	F	W-B		43S127E	PAC	47.9	47.9	53.8	53.8	5.9	0.116158	1
16	Ellis	1982.1	Mg ha-1	pool	clearcut		burn	1	0-5	Mix	H		751-1000	10	0-10	10	Top	A	C	W-B		42S148E	PAC	31.6	31.6	31.9	31.9	0.3	0.00944889	1
17	Ellis and Graley	1983.1	Mg ha-1	pool	clearcut			1	0-5	Mix	H		1001-1400	10	0-10	10	Top	A	F	W-B		43S127E	PAC	52.9	52.9	50.5	50.5	-2.4	-0.04643	1
18	Ellis and Graley	1983.1	Mg ha-1	pool	clearcut		burn	1	0-5	Mix	H		1001-1400	10	0-10	10	Top	A	F	W-B		43S127E	PAC	52.9	52.9	42.7	42.7	-10.2	-0.214204	1
19	Edwards	1983.4	g m-2	pool	clearcut	WTH	remove	1	0-5	Mix	H	10.1-15	1401-1800	45	0-15	15	Top	A	F	W-B	ULT	ORNL	SE NAM	2079	20.79	1940	19.4	-1.39	-0.069199	1
20	Edwards	1983.4	g m-2	pool	clearcut	sawlog	retain	1	0-5	Mix	H	10.1-15	1401-1800	45	0-15	15	Top	A	F	W-B	ULT	ORNL	SE NAM	2079	20.79	1827	18.27	-2.52	-0.129212	1
21	Edwards	1983.4	g m-2	pool	clearcut	WTH	remove	1	0-5	Mix	H	10.1-15	1401-1800	45	15-30	30	Mid	BC	F	W-B	ULT	ORNL	SE NAM	713	7.13	677	6.77	-0.36	-0.0518101	1
22	Edwards	1983.4	g m-2	pool	clearcut	sawlog	retain	1	0-5	Mix	H	10.1-15	1401-1800	45	15-30	30	Mid	BC	F	W-B	ULT	ORNL	SE NAM	713	7.13	664	6.64	-0.49	-0.0711993	1
23	Edwards	1983.4	g m-2	pool	clearcut	WTH	remove	1	0-5	Mix	H	10.1-15	1401-1800	45	30-45	45	Deep	BC	F	W-B	ULT	ORNL	SE NAM	677	6.77	664	6.64	-0.13	-0.0193891	1
24	Edwards	1983.4	g m-2	pool	clearcut	sawlog	retain	1	0-5	Mix	H	10.1-15	1401-1800	45	30-45	45	Deep	BC	F	W-B	ULT	ORNL	SE NAM	677	6.77	664	6.64	-0.13	-0.0193891	1
25	Hendrickson	1989.2	tonnes ha-1	pool	thin			3	0-5	Mix	C	0-5	751-1000	20	O	0	O	O	O	LOI	SPOD	46N77W	NE NAM	33.5	33.5	40.2	40.2	6.7	0.182322	1
26	Hendrickson	1989.2	tonnes ha-1	pool	clearcut			3	0-5	Mix	C	0-5	751-1000	20	O	0	O	O	O	LOI	SPOD	46N77W	NE NAM	33.5	33.5	32.8	32.8	-0.7	-0.0211169	1
27	Hendrickson	1989.2	tonnes ha-1	pool	thin			3	0-5	Mix	C	0-5	751-1000	20	0-10	10	Top	A	C	LOI	SPOD	46N77W	NE NAM	38.8	38.8	48.2	48.2	9.4	0.216939	1
28	Hendrickson	1989.2	tonnes ha-1	pool	clearcut			3	0-5	Mix	C	0-5	751-1000	20	0-10	10	Top	A	C	LOI	SPOD	46N77W	NE NAM	38.8	38.8	47	47	8.2	0.191727	1
29	Hendrickson	1989.2	tonnes ha-1	pool	thin			3	0-5	Mix	C	0-5	751-1000	20	10-20	20	Mid	A	C	LOI	SPOD	46N77W	NE NAM	32.5	32.5	35	35	2.5	0.074108	1
30	Hendrickson	1989.2	tonnes ha-1	pool	clearcut			3	0-5	Mix	C	0-5	751-1000	20	10-20	20	Mid	A	C	LOI	SPOD	46N77W	NE NAM	32.5	32.5	38.4	38.4	5.9	0.166817	1
31	Mattson and Swank	1989.3	kg m-2	pool	clearcut	sawlog	remove	3	0-5	Mix	H	10.1-15	>1800	60	O	0	O	O	O	TOC	INCEP	35N83W	SE NAM	1.14	11.4	1.34	13.4	2	0.161641	1	Went back to paper’s units
32	Mattson and Swank	1989.3	kg m-2	pool	clearcut	sawlog	retain	6	6-20	Mix	H	10.1-15	>1800	60	O	0	O	O	O	TOC	INCEP	35N83W	SE NAM	1.14	11.4	2.18	21.8	10.4	0.648297	1	Went back to paper’s units
33	Mattson and Swank	1989.3	kg m-2	pool	clearcut	sawlog	remove	4	0-5	Mix	H	10.1-15	>1800	60	0-10	10	Top	A	F	TOC	INCEP	35N83W	SE NAM	2.11	21.1	1.98	19.8	-1.3	-0.0635911	1	Went back to paper’s units
34	Mattson and Swank	1989.3	kg m-2	pool	clearcut	sawlog	retain	7	6-20	Mix	H	10.1-15	>1800	60	0-10	10	Top	A	F	TOC	INCEP	35N83W	SE NAM	2.11	21.1	1.81	18.1	-3	-0.153361	1	Went back to paper’s units
35	Mattson and Swank	1989.3	kg m-2	pool	clearcut	sawlog	remove	4	0-5	Mix	H	10.1-15	>1800	60	10-30	30	Mid	BC	F	TOC	INCEP	35N83W	SE NAM	2.2	22	2.76	27.6	5.6	0.226773	1	Previous version lumped 10-30 and 30-60 together, so now separating
36	Mattson and Swank	1989.3	kg m-2	pool	clearcut	sawlog	retain	7	6-20	Mix	H	10.1-15	>1800	60	10-30	30	Mid	BC	F	TOC	INCEP	35N83W	SE NAM	2.2	22	1.87	18.7	-3.3	-0.162519	1	Previous version lumped 10-30 and 30-60 together, so now separating
37	Mattson and Swank	1989.3	kg m-2	pool	clearcut	sawlog	remove	4	0-5	Mix	H	10.1-15	>1800	60	30-60	60	Deep	BC	F	TOC	INCEP	35N83W	SE NAM	1.37	13.7	3.16	31.6	17.9	0.835761	1	Previous version lumped 10-30 and 30-60 together, so now separating
38	Mattson and Swank	1989.3	kg m-2	pool	clearcut	sawlog	retain	7	6-20	Mix	H	10.1-15	>1800	60	30-60	60	Deep	BC	F	TOC	INCEP	35N83W	SE NAM	1.37	13.7	1.51	15.1	1.4	0.0972989	1	Previous version lumped 10-30 and 30-60 together, so now separating
39	Edmonds and McColl	1989.4	%	conc	clearcut			1	0-5	Radiata Pine	C		751-1000	20	0-7	7	Top	A	C	W-B	SPOD	Australia	PAC	3.7	3.7	4.2	4.2	0.5	0.126752	1
40	Edmonds and McColl	1989.4	%	conc	clearcut			5	0-5	Radiata Pine	C		751-1000	20	0-7	7	Top	A	C	W-B	SPOD	Australia	PAC	3.7	3.7	4.1	4.1	0.4	0.102654	1
41	Edmonds and McColl	1989.4	%	conc	clearcut			1	0-5	Radiata Pine	C		751-1000	20	7-20	20	Top	A	C	W-B	SPOD	Australia	PAC	0.8	0.8	1.3	1.3	0.5	0.485508	1
42	Edmonds and McColl	1989.4	%	conc	clearcut			5	0-5	Radiata Pine	C		751-1000	20	7-20	20	Top	A	C	W-B	SPOD	Australia	PAC	0.8	0.8	1.3	1.3	0.5	0.485508	1
43	Frazer	1990.1	Mg ha-1	pool	clearcut	sawlog	burn	6	6-20	Mix	C	10.1-15	1401-1800	14	0-7	7	Top	A	F	W-B	ALF	39N121W	SW NAM	46	46	50.4	50.4	4.4	0.0913498	1
44	Frazer	1990.1	Mg ha-1	pool	clearcut	sawlog	burn	18	6-20	Mix	C	10.1-15	1401-1800	14	0-7	7	Top	A	F	W-B	ALF	39N121W	SW NAM	46	46	40.3	40.3	-5.7	-0.13229	1
45	Frazer	1990.1	Mg ha-1	pool	clearcut	sawlog	burn	6	6-20	Mix	C	10.1-15	1401-1800	14	7-14	14	Top	A	F	W-B	ALF	39N121W	SW NAM	20	20	24.5	24.5	4.5	0.202941	1
46	Frazer	1990.1	Mg ha-1	pool	clearcut	sawlog	burn	18	6-20	Mix	C	10.1-15	1401-1800	14	7-14	14	Top	A	F	W-B	ALF	39N121W	SW NAM	20	20	18.2	18.2	-1.8	-0.0943107	1
47	Johnson a	1991.1	Mg ha-1	pool	clearcut	WTH		3	0-5	Mix	H	5-7.5	1001-1400	20	O	0	O	O	O	LOI	SPOD	HubbardBk	NE NAM	54	54	57	57	3	0.0540672	1
48	Johnson a	1991.1	Mg ha-1	pool	clearcut	WTH		3	0-5	Mix	H	5-7.5	1001-1400	20	0-10	10	Top	A	C	LOI	SPOD	HubbardBk	NE NAM	60	60	64	64	4	0.0645385	1
49	Johnson a	1991.1	Mg ha-1	pool	clearcut	WTH		3	0-5	Mix	H	5-7.5	1001-1400	20	10-20	20	Mid	A	C	LOI	SPOD	HubbardBk	NE NAM	54	54	58	58	4	0.071459	1
50	Goh and Phillips	1991.4	tonnes ha-1	pool	clearcut	WTH		2	0-5	Beech	H		1401-1800	60	O	0	O	O	O	LOI	INCEP	42S172E	PAC	44	44	27	27	-17	-0.488353	1
51	Goh and Phillips	1991.4	tonnes ha-1	pool	clearcut	WTH	burn	2	0-5	Beech	H		1401-1800	60	O	0	O	O	O	LOI	INCEP	42S172E	PAC	44	44	25	25	-19	-0.565314	1
52	Goh and Phillips	1991.4	tonnes ha-1	pool	clearcut	sawlog		2	0-5	Beech	H		1401-1800	60	O	0	O	O	O	LOI	INCEP	42S172E	PAC	44	44	32	32	-12	-0.318454	1
53	Goh and Phillips	1991.4	tonnes ha-1	pool	clearcut	sawlog	burn	2	0-5	Beech	H		1401-1800	60	O	0	O	O	O	LOI	INCEP	42S172E	PAC	44	44	28	28	-16	-0.451985	1
54	Alban and Perala	1992.6	Mg ha-1	pool	clearcut			1	0-5	Aspen	H			50	0-50	50	Whole	ABC	F	LOI	SPOD	N MN	NE NAM	64.2	64.2	66.8	66.8	2.6	0.0396999	1
55	Alban and Perala	1992.6	Mg ha-1	pool	clearcut			5	0-5	Aspen	H			50	0-50	50	Whole	ABC	F	LOI	SPOD	N MN	NE NAM	64.2	64.2	62.5	62.5	-1.7	-0.0268367	1
56	Alban and Perala	1992.6	Mg ha-1	pool	clearcut			7	6-20	Aspen	H			50	0-50	50	Whole	ABC	F	LOI	SPOD	N MN	NE NAM	64.2	64.2	68.1	68.1	3.9	0.058974	1
57	Alban and Perala	1992.6	Mg ha-1	pool	clearcut			40	21-40	Aspen	H			50	0-50	50	Whole	ABC	F	LOI	SPOD	N MN	NE NAM	64.2	64.2	52.3	52.3	-11.9	-0.205007	1
58	Alban and Perala	1992.6	Mg ha-1	pool	clearcut			55	>40	Aspen	H			50	0-50	50	Whole	ABC	F	LOI	SPOD	N MN	NE NAM	64.2	64.2	60	60	-4.2	-0.0676586	1
59	Alban and Perala	1992.6	Mg ha-1	pool	clearcut			66	>40	Aspen	H			50	0-50	50	Whole	ABC	F	LOI	SPOD	N MN	NE NAM	64.2	64.2	67.6	67.6	3.4	0.0516048	1
60	Alban and Perala	1992.6	Mg ha-1	pool	clearcut			74	>40	Aspen	H			50	0-50	50	Whole	ABC	F	LOI	SPOD	N MN	NE NAM	64.2	64.2	65	65	0.8	0.0123841	1
61	Borchers and Perry	1992.7	%	conc	clearcut		burn	12	6-20	Fir	C		1401-1800	15	0-15	15	Top	A	C	TOC	INCEP	Oregon	NW NAM	5	5	5.4	5.4	0.4	0.076961	1
62	Borchers and Perry	1992.7	%	conc	clearcut		burn	13	6-20	Fir	C		1401-1800	15	0-15	15	Top	A	C	TOC	INCEP	Oregon	NW NAM	5.7	5.7	5.2	5.2	-0.5	-0.0918075	1
63	Borchers and Perry	1992.7	%	conc	clearcut		burn	15	6-20	Fir	C		1001-1400	15	0-15	15	Top	A	F	TOC	INCEP	Oregon	NW NAM	8.6	8.6	7.9	7.9	-0.7	-0.0848994	1
64	Borchers and Perry	1992.7	%	conc	clearcut		burn	16	6-20	Fir	C		1001-1400	15	0-15	15	Top	A	F	TOC	INCEP	Oregon	NW NAM	9.7	9.7	8.2	8.2	-1.5	-0.167992	1
65	Mattson and Smith	1993.3	g m-2	pool	thin	sawlog	retain	1	0-5	Mix	H	7.6-10	1401-1800	10	O	0	O	O	O	LOI	INCEP	40N80W	NE NAM	1305	13.05	1164	11.64	-1.41	-0.114341	1
66	Mattson and Smith	1993.3	g m-2	pool	clearcut	WTH	remove	2	0-5	Mix	H	7.6-10	1401-1800	10	O	0	O	O	O	LOI	INCEP	40N80W	NE NAM	2190	21.9	1107	11.07	-10.83	-0.682248	1
67	Mattson and Smith	1993.3	g m-2	pool	thin	WTH	retain	2	0-5	Mix	H	7.6-10	1401-1800	10	O	0	O	O	O	LOI	INCEP	40N80W	NE NAM	1394	13.94	630	6.3	-7.64	-0.794213	1
68	Mattson and Smith	1993.3	g m-2	pool	clearcut	sawlog	retain	4	0-5	Mix	H	7.6-10	1401-1800	10	O	0	O	O	O	LOI	INCEP	40N80W	NE NAM	1061	10.61	748	7.48	-3.13	-0.349564	1
69	Mattson and Smith	1993.3	g m-2	pool	clearcut	sawlog	retain	4	0-5	Mix	H	7.6-10	1401-1800	10	O	0	O	O	O	LOI	INCEP	40N80W	NE NAM	1597	15.97	1236	12.36	-3.61	-0.256247	1
70	Mattson and Smith	1993.3	g m-2	pool	clearcut	sawlog	remove	6	6-20	Mix	H	7.6-10	1401-1800	10	O	0	O	O	O	LOI	ULT	40N80W	NE NAM	1533	15.33	1705	17.05	1.72	0.106339	1
71	Mattson and Smith	1993.3	g m-2	pool	clearcut	sawlog	remove	7	6-20	Mix	H	7.6-10	1401-1800	10	O	0	O	O	O	LOI	INCEP	40N80W	NE NAM	1171	11.71	770	7.7	-4.01	-0.419223	1
72	Mattson and Smith	1993.3	g m-2	pool	clearcut	sawlog	remove	7	6-20	Mix	H	7.6-10	1401-1800	10	O	0	O	O	O	LOI	ULT	40N80W	NE NAM	2384	23.84	1763	17.63	-6.21	-0.301763	1
73	Mattson and Smith	1993.3	g m-2	pool	clearcut	sawlog	retain	8	6-20	Mix	H	7.6-10	1401-1800	10	O	0	O	O	O	LOI	INCEP	40N80W	NE NAM	1696	16.96	654	6.54	-10.42	-0.95292	1
74	Mattson and Smith	1993.3	g m-2	pool	clearcut	sawlog	retain	11	6-20	Mix	H	7.6-10	1401-1800	10	O	0	O	O	O	LOI	INCEP	40N80W	NE NAM	2050	20.5	1355	13.55	-6.95	-0.414038	1
75	Mattson and Smith	1993.3	g m-2	pool	clearcut	sawlog	burn	20	6-20	Mix	H	7.6-10	1401-1800	10	O	0	O	O	O	LOI	ULT	40N80W	NE NAM	2241	22.41	776	7.76	-14.65	-1.06052	1
76	Mattson and Smith	1993.3	g m-2	pool	clearcut	sawlog	burn	20	6-20	Mix	H	7.6-10	1401-1800	10	O	0	O	O	O	LOI	ULT	40N80W	NE NAM	950	9.5	612	6.12	-3.38	-0.43973	1
77	Mattson and Smith	1993.3	g m-2	pool	clearcut	sawlog	retain	23	21-40	Mix	H	7.6-10	1401-1800	10	O	0	O	O	O	LOI	ULT	40N80W	NE NAM	1083	10.83	1522	15.22	4.39	0.34029	1
78	Mattson and Smith	1993.3	g m-2	pool	clearcut	sawlog	retain	23	21-40	Mix	H	7.6-10	1401-1800	10	O	0	O	O	O	LOI	INCEP	40N80W	NE NAM	2101	21.01	1014	10.14	-10.87	-0.728511	1
79	Mattson and Smith	1993.3	g m-2	pool	clearcut	sawlog	retain	23	21-40	Mix	H	7.6-10	1401-1800	10	O	0	O	O	O	LOI	ULT	40N80W	NE NAM	2468	24.68	1425	14.25	-10.43	-0.549236	1
80	Mattson and Smith	1993.3	g m-2	pool	thin	sawlog	retain	1	0-5	Mix	H	7.6-10	1401-1800	10	0-10	10	Top	A	F	LOI	INCEP	40N80W	NE NAM	7441	74.41	6856	68.56	-5.85	-0.0818811	1
81	Mattson and Smith	1993.3	g m-2	pool	clearcut	WTH	remove	2	0-5	Mix	H	7.6-10	1401-1800	10	0-10	10	Top	A	F	LOI	INCEP	40N80W	NE NAM	5425	54.25	5974	59.74	5.49	0.0963988	1
82	Mattson and Smith	1993.3	g m-2	pool	thin	WTH	retain	2	0-5	Mix	H	7.6-10	1401-1800	10	0-10	10	Top	A	F	LOI	INCEP	40N80W	NE NAM	2951	29.51	2866	28.66	-0.85	-0.0292268	1
83	Mattson and Smith	1993.3	g m-2	pool	clearcut	sawlog	retain	4	0-5	Mix	H	7.6-10	1401-1800	10	0-10	10	Top	A	F	LOI	INCEP	40N80W	NE NAM	5183	51.83	3047	30.47	-21.36	-0.531227	1
84	Mattson and Smith	1993.3	g m-2	pool	clearcut	sawlog	retain	4	0-5	Mix	H	7.6-10	1401-1800	10	0-10	10	Top	A	F	LOI	INCEP	40N80W	NE NAM	4466	44.66	4487	44.87	0.21	0.00469117	1
85	Mattson and Smith	1993.3	g m-2	pool	clearcut	sawlog	remove	6	6-20	Mix	H	7.6-10	1401-1800	10	0-10	10	Top	A	F	LOI	ULT	40N80W	NE NAM	5826	58.26	5297	52.97	-5.29	-0.09519	1
86	Mattson and Smith	1993.3	g m-2	pool	clearcut	sawlog	remove	7	6-20	Mix	H	7.6-10	1401-1800	10	0-10	10	Top	A	F	LOI	INCEP	40N80W	NE NAM	4833	48.33	4735	47.35	-0.98	-0.0204857	1
87	Mattson and Smith	1993.3	g m-2	pool	clearcut	sawlog	remove	7	6-20	Mix	H	7.6-10	1401-1800	10	0-10	10	Top	A	F	LOI	ULT	40N80W	NE NAM	5463	54.63	3962	39.62	-15.01	-0.321249	1
88	Mattson and Smith	1993.3	g m-2	pool	clearcut	sawlog	retain	8	6-20	Mix	H	7.6-10	1401-1800	10	0-10	10	Top	A	F	LOI	INCEP	40N80W	NE NAM	4050	40.5	4121	41.21	0.71	0.017379	1
89	Mattson and Smith	1993.3	g m-2	pool	clearcut	sawlog	retain	11	6-20	Mix	H	7.6-10	1401-1800	10	0-10	10	Top	A	F	LOI	INCEP	40N80W	NE NAM	4968	49.68	5009	50.09	0.41	0.00821895	1
90	Mattson and Smith	1993.3	g m-2	pool	clearcut	sawlog	burn	20	6-20	Mix	H	7.6-10	1401-1800	10	0-10	10	Top	A	F	LOI	ULT	40N80W	NE NAM	5222	52.22	4248	42.48	-9.74	-0.206432	1
91	Mattson and Smith	1993.3	g m-2	pool	clearcut	sawlog	burn	20	6-20	Mix	H	7.6-10	1401-1800	10	0-10	10	Top	A	F	LOI	ULT	40N80W	NE NAM	5248	52.48	3807	38.07	-14.41	-0.321006	1
92	Mattson and Smith	1993.3	g m-2	pool	clearcut	sawlog	retain	23	21-40	Mix	H	7.6-10	1401-1800	10	0-10	10	Top	A	F	LOI	ULT	40N80W	NE NAM	5494	54.94	7089	70.89	15.95	0.254888	1
93	Mattson and Smith	1993.3	g m-2	pool	clearcut	sawlog	retain	23	21-40	Mix	H	7.6-10	1401-1800	10	0-10	10	Top	A	F	LOI	INCEP	40N80W	NE NAM	4965	49.65	5540	55.4	5.75	0.109581	1
94	Mattson and Smith	1993.3	g m-2	pool	clearcut	sawlog	retain	23	21-40	Mix	H	7.6-10	1401-1800	10	0-10	10	Top	A	F	LOI	ULT	40N80W	NE NAM	6700	67	7482	74.82	7.82	0.110393	1
95	Keenan	1994.2	%	conc	clearcut		burn	4	0-5	Mix	C	7.6-10	1401-1800	20	0-20	20	Top	A		LOI	SPOD	BC	NW NAM	86	86	77	77	-9	-0.110542	1
96	Black and Harden	1995.1	Mg ha-1	pool	clearcut	sawlog	burn	2	0-5	Mix	C	16-20	1401-1800	20	O	0	O	O	O	CHN	ALF	39N121W	SW NAM	15	15	20	20	5	0.287682	1
97	Black and Harden	1995.1	Mg ha-1	pool	clearcut	sawlog	burn	7	6-20	Mix	C	16-20	1401-1800	20	O	0	O	O	O	CHN	ALF	39N121W	SW NAM	15	15	60	60	45	1.38629	1
98	Black and Harden	1995.1	Mg ha-1	pool	clearcut	sawlog	burn	12	6-20	Mix	C	16-20	1401-1800	20	O	0	O	O	O	CHN	ALF	39N121W	SW NAM	15	15	12	12	-3	-0.223144	1
99	Black and Harden	1995.1	Mg ha-1	pool	clearcut	sawlog	burn	17	6-20	Mix	C	16-20	1401-1800	20	O	0	O	O	O	CHN	ALF	39N121W	SW NAM	15	15	4	4	-11	-1.32176	1
100	Black and Harden	1995.1	Mg ha-1	pool	clearcut	sawlog	retain	79	>40	Mix	C	16-20	1401-1800	20	O	0	O	O	O	CHN	ALF	39N121W	SW NAM	15	15	19	19	4	0.236389	1
101	Black and Harden	1995.1	Mg ha-1	pool	clearcut	sawlog	burn	2	0-5	Mix	C	16-20	1401-1800	20	0-10	10	Top	A	F	CHN	ALF	39N121W	SW NAM	41	41	63	63	22	0.429563	1
102	Black and Harden	1995.1	Mg ha-1	pool	clearcut	sawlog	burn	7	6-20	Mix	C	16-20	1401-1800	20	0-10	10	Top	A	F	CHN	ALF	39N121W	SW NAM	41	41	61	61	20	0.397302	1
103	Black and Harden	1995.1	Mg ha-1	pool	clearcut	sawlog	burn	12	6-20	Mix	C	16-20	1401-1800	20	0-10	10	Top	A	F	CHN	ALF	39N121W	SW NAM	41	41	46	46	5	0.115069	1
104	Black and Harden	1995.1	Mg ha-1	pool	clearcut	sawlog	burn	17	6-20	Mix	C	16-20	1401-1800	20	0-10	10	Top	A	F	CHN	ALF	39N121W	SW NAM	41	41	54	54	13	0.275412	1
105	Black and Harden	1995.1	Mg ha-1	pool	clearcut	sawlog	retain	79	>40	Mix	C	16-20	1401-1800	20	0-10	10	Top	A	F	CHN	ALF	39N121W	SW NAM	41	41	56	56	15	0.31178	1
106	Black and Harden	1995.1	Mg ha-1	pool	clearcut	sawlog	burn	2	0-5	Mix	C	16-20	1401-1800	20	10-20	20	Mid	A	F	CHN	ALF	39N121W	SW NAM	29	29	36	36	7	0.216223	1
107	Black and Harden	1995.1	Mg ha-1	pool	clearcut	sawlog	burn	7	6-20	Mix	C	16-20	1401-1800	20	10-20	20	Mid	A	F	CHN	ALF	39N121W	SW NAM	29	29	39	39	10	0.296266	1
108	Black and Harden	1995.1	Mg ha-1	pool	clearcut	sawlog	burn	12	6-20	Mix	C	16-20	1401-1800	20	10-20	20	Mid	A	F	CHN	ALF	39N121W	SW NAM	29	29	31	31	2	0.0666914	1
109	Black and Harden	1995.1	Mg ha-1	pool	clearcut	sawlog	burn	17	6-20	Mix	C	16-20	1401-1800	20	10-20	20	Mid	A	F	CHN	ALF	39N121W	SW NAM	29	29	41	41	12	0.346276	1
110	Black and Harden	1995.1	Mg ha-1	pool	clearcut	sawlog	retain	79	>40	Mix	C	16-20	1401-1800	20	10-20	20	Mid	A	F	CHN	ALF	39N121W	SW NAM	29	29	40	40	11	0.321584	1
111	Johnson b	1995.2	Mg ha-1	pool	clearcut	WTH		3	0-5	Mix	H	5-7.5	1001-1400		O	0	O	O	O	CHN	SPOD	44N72W	NE NAM	31	31	39.9	39.9	8.9	0.252389	1
112	Johnson b	1995.2	Mg ha-1	pool	clearcut	WTH		8	6-20	Mix	H	5-7.5	1001-1400		O	0	O	O	O	CHN	SPOD	44N72W	NE NAM	31	31	22	22	-9	-0.342945	1
113	Johnson b	1995.2	Mg ha-1	pool	clearcut	WTH		8	6-20	Mix	C	5-7.5	1001-1400		O	0	O	O	O	CHN	SPOD	44N72W	NE NAM	48.6	48.6	37.3	37.3	-11.3	-0.26463	1	subdivide for spruce-fir
114	Johnson b	1995.2	Mg ha-1	pool	clearcut	WTH		8	6-20	Mix	H	5-7.5	1001-1400		O	0	O	O	O	CHN	SPOD	44N72W	NE NAM	20.1	20.1	11.2	11.2	-8.9	-0.584806	1	subdivide for high hardwood
115	Johnson b	1995.2	Mg ha-1	pool	clearcut	WTH		8	6-20	Mix	H	5-7.5	1001-1400		O	0	O	O	O	CHN	SPOD	44N72W	NE NAM	28.3	28.3	26.9	26.9	-1.4	-0.0507355	1	subdivide for low hardwood
116	Johnson b	1995.2	Mg ha-1	pool	clearcut	WTH		3	0-5	Mix	H	5-7.5	1001-1400		0-10	10	Top	A	C	CHN	SPOD	44N72W	NE NAM	32	32	34	34	2	0.0606246	1
117	Johnson b	1995.2	Mg ha-1	pool	clearcut	WTH		8	6-20	Mix	H	5-7.5	1001-1400		0-10	10	Top	A	C	CHN	SPOD	44N72W	NE NAM	32	32	32	32	0	0	1
118	Johnson b	1995.2	Mg ha-1	pool	clearcut	WTH		3	0-5	Mix	H	5-7.5	1001-1400		10-top of C		Mid	BC	C	CHN	SPOD	44N72W	NE NAM	111	111	106	106	-5	-0.0460911	1
119	Johnson b	1995.2	Mg ha-1	pool	clearcut	WTH		8	6-20	Mix	H	5-7.5	1001-1400		10-top of C		Mid	BC	C	CHN	SPOD	44N72W	NE NAM	111	111	86	86	-25	-0.255183	1
120	Johnson b	1995.2	Mg ha-1	pool	clearcut	WTH		8	6-20	Mix	C	5-7.5	1001-1400		0-top of C		Whole	ABC	C	CHN	SPOD	44N72W	NE NAM	91.8	91.8	109	109	17.2	0.171736	1	subdivide for spruce-fir
121	Johnson b	1995.2	Mg ha-1	pool	clearcut	WTH		8	6-20	Mix	H	5-7.5	1001-1400		0-top of C		Whole	ABC	C	CHN	SPOD	44N72W	NE NAM	152	152	127	127	-25	-0.179693	1	subdivide for high hardwood
122	Johnson b	1995.2	Mg ha-1	pool	clearcut	WTH		8	6-20	Mix	H	5-7.5	1001-1400		0-top of C		Whole	ABC	C	CHN	SPOD	44N72W	NE NAM	134	134	114	114	-20	-0.161641	1	subdivide for low hardwood
123	Vesterdal	1995.8	kg ha-1	pool	thin				0-5	Spruce	C	7.6-10	500-750	0	O	0	O	O	O	CHN	ALF	55N12E	EUR	13163	13.163	7822	7.822	-5.341	-0.52047	1
124	Vesterdal	1995.8	kg ha-1	pool	thin				0-5	Spruce	C	5-7.5	500-750	0	O	0	O	O	O	CHN	ALF	57N10E	EUR	13163	13.163	6761	6.761	-6.402	-0.666239	1
125	Vesterdal	1995.8	kg ha-1	pool	thin				0-5	Spruce	C	7.6-10	500-750	0	O	0	O	O	O	CHN	INCEP	56N12E	EUR	13163	13.163	2323	2.323	-10.84	-1.73455	1
126	Vesterdal	1995.8	kg ha-1	pool	thin				0-5	Spruce	C	7.6-10	500-750	0	O	0	O	O	O	CHN	ALF	55N12E	EUR	17011	17.011	14671	14.671	-2.34	-0.147987	1
127	Vesterdal	1995.8	kg ha-1	pool	thin				0-5	Spruce	C	5-7.5	500-750	0	O	0	O	O	O	CHN	ALF	57N10E	EUR	17011	17.011	14165	14.165	-2.846	-0.183086	1
128	Vesterdal	1995.8	kg ha-1	pool	thin				0-5	Spruce	C	7.6-10	500-750	0	O	0	O	O	O	CHN	INCEP	56N12E	EUR	17011	17.011	10907	10.907	-6.104	-0.444455	1
129	Vesterdal	1995.8	kg ha-1	pool	thin				0-5	Spruce	C	7.6-10	500-750	0	O	0	O	O	O	CHN	ALF	55N12E	EUR	47875	47.875	56002	56.002	8.127	0.156794	1
130	Vesterdal	1995.8	kg ha-1	pool	thin				0-5	Spruce	C	5-7.5	500-750	0	O	0	O	O	O	CHN	ALF	57N10E	EUR	47875	47.875	53201	53.201	5.326	0.105484	1
131	Vesterdal	1995.8	kg ha-1	pool	thin				0-5	Spruce	C	7.6-10	500-750	0	O	0	O	O	O	CHN	INCEP	56N12E	EUR	47875	47.875	40788	40.788	-7.087	-0.160206	1
132	Rab	1996.1	%	conc	clearcut	sawlog	burn	1	0-5	Ash	H	7.6-10	>1800	10	0-10	10	Top	A	F	W-B	ULT	30S146E	AUS	15.4	15.4	13.1	13.1	-2.3	-0.161755	1
133	Rab	1996.1	%	conc	clearcut	sawlog	burn	1	0-5	Ash	H	7.6-10	>1800	10	0-10	10	Top	A	F	W-B	ULT	30S146E	AUS	15.4	15.4	10.7	10.7	-4.7	-0.364124	1
134	Rab	1996.1	%	conc	clearcut	sawlog	burn	1	0-5	Ash	H	7.6-10	>1800	10	0-10	10	Top	A	F	W-B	ULT	30S146E	AUS	8.7	8.7	11.5	11.5	2.8	0.279024	1
135	Rab	1996.1	%	conc	clearcut	sawlog	burn	1	0-5	Ash	H	7.6-10	>1800	10	0-10	10	Top	A	F	W-B	ULT	30S146E	AUS	8.7	8.7	10.2	10.2	1.5	0.159065	1
136	Rab	1996.1	%	conc	clearcut	sawlog	burn	1	0-5	Ash	H	7.6-10	>1800	10	0-10	10	Top	A	F	W-B	ULT	30S146E	AUS	5.2	5.2	6.3	6.3	1.1	0.191891	1
137	Rab	1996.1	%	conc	clearcut	sawlog	burn	1	0-5	Ash	H	7.6-10	>1800	10	0-10	10	Top	A	F	W-B	ULT	30S146E	AUS	5.2	5.2	5.8	5.8	0.6	0.109199	1
138	Rab	1996.1	%	conc	clearcut	sawlog	burn	1	0-5	Ash	H	7.6-10	>1800	10	0-10	10	Top	A	F	W-B	ULT	30S146E	AUS	5.3	5.3	5.4	5.4	0.1	0.0186921	1
139	Rab	1996.1	%	conc	clearcut	sawlog	burn	1	0-5	Ash	H	7.6-10	>1800	10	0-10	10	Top	A	F	W-B	ULT	30S146E	AUS	5.3	5.3	5	5	-0.3	-0.0582689	1
140	McLaughlin	1996.5	kg ha-1	pool	clearcut	WTH	retain	5	0-5	Mix	C	5-7.5	500-750	50	O	0	O	O	O	LOI	SPOD	46N87W	NE NAM	31387	31.387	8904	8.904	-22.483	-1.25989	1	depth is average of control and two treatment sites
141	McLaughlin	1996.5	kg ha-1	pool	clearcut	WTH	intensive	5	0-5	Mix	C	5-7.5	500-750	50	O	0	O	O	O	LOI	SPOD	46N87W	NE NAM	31387	31.387	12692	12.692	-18.695	-0.905422	1	depth is average of control and two treatment sites
142	McLaughlin	1996.5	kg ha-1	pool	clearcut	WTH	retain	5	0-5	Mix	C	5-7.5	500-750	50	0-5	5	Top	A	C	LOI	SPOD	46N87W	NE NAM	3090	3.09	3920	3.92	0.83	0.237921	1	depth is average of control and two treatment sites
143	McLaughlin	1996.5	kg ha-1	pool	clearcut	WTH	intensive	5	0-5	Mix	C	5-7.5	500-750	50	0-5	5	Top	A	C	LOI	SPOD	46N87W	NE NAM	3090	3.09	6323	6.323	3.233	0.716023	1	depth is average of control and two treatment sites
144	McLaughlin	1996.5	kg ha-1	pool	clearcut	WTH	retain	5	0-5	Mix	C	5-7.5	500-750	50	5-15	15	Top	BC	C	LOI	SPOD	46N87W	NE NAM	9394	9.394	7362	7.362	-2.032	-0.24374	1	depth is average of control and two treatment sites
145	McLaughlin	1996.5	kg ha-1	pool	clearcut	WTH	intensive	5	0-5	Mix	C	5-7.5	500-750	50	5-15	15	Top	BC	C	LOI	SPOD	46N87W	NE NAM	9394	9.394	11495	11.495	2.101	0.201841	1	depth is average of control and two treatment sites
146	McLaughlin	1996.5	kg ha-1	pool	clearcut	WTH	retain	5	0-5	Mix	C	5-7.5	500-750	50	15-26	26	Mid	BC	C	LOI	SPOD	46N87W	NE NAM	12995	12.995	10629	10.629	-2.366	-0.200979	1	depth is average of control and two treatment sites
147	McLaughlin	1996.5	kg ha-1	pool	clearcut	WTH	intensive	5	0-5	Mix	C	5-7.5	500-750	50	15-26	26	Mid	BC	C	LOI	SPOD	46N87W	NE NAM	12995	12.995	15746	15.746	2.751	0.192022	1	depth is average of control and two treatment sites
148	McLaughlin	1996.5	kg ha-1	pool	clearcut	WTH	retain	5	0-5	Mix	C	5-7.5	500-750	50	26-42	42	Deep	BC	C	LOI	SPOD	46N87W	NE NAM	43859	43.859	29120	29.12	-14.739	-0.409555	1	depth is average of control and two treatment sites
149	McLaughlin	1996.5	kg ha-1	pool	clearcut	WTH	intensive	5	0-5	Mix	C	5-7.5	500-750	50	26-42	42	Deep	BC	C	LOI	SPOD	46N87W	NE NAM	43859	43.859	31916	31.916	-11.943	-0.317872	1	depth is average of control and two treatment sites
150	Strong	1997.1	Mg ha-1	pool	thin	sawlog		10	6-20	Mix	C	0-5	751-1000	40	0-10	10	Top	A		CHN	SPOD	MN, USA	NE NAM	51.8	51.8	50.2	50.2	-1.6	-0.0313751	1
151	Strong	1997.1	Mg ha-1	pool	thin	sawlog		10	6-20	Mix	C	0-5	751-1000	40	0-10	10	Top	A		CHN	SPOD	MN, USA	NE NAM	51.8	51.8	50.9	50.9	-0.9	-0.0175272	1
152	Strong	1997.1	Mg ha-1	pool	thin	sawlog		10	6-20	Mix	C	0-5	751-1000	40	0-10	10	Top	A		CHN	SPOD	MN, USA	NE NAM	51.8	51.8	45.2	45.2	-6.6	-0.136293	1
153	Strong	1997.1	Mg ha-1	pool	clearcut	sawlog		40	21-40	Mix	C	0-5	751-1000	40	0-10	10	Top	A		CHN	SPOD	MN, USA	NE NAM	51.8	51.8	38.9	38.9	-12.9	-0.286396	1
154	Strong	1997.1	Mg ha-1	pool	thin	sawlog		10	6-20	Mix	C	0-5	751-1000	40	10-40	40	Mid	BC		CHN	SPOD	MN, USA	NE NAM	68.1	68.1	61	61	-7.1	-0.110103	1
155	Strong	1997.1	Mg ha-1	pool	thin	sawlog		10	6-20	Mix	C	0-5	751-1000	40	10-40	40	Mid	BC		CHN	SPOD	MN, USA	NE NAM	68.1	68.1	54.6	54.6	-13.5	-0.220943	1
156	Strong	1997.1	Mg ha-1	pool	thin	sawlog		10	6-20	Mix	C	0-5	751-1000	40	10-40	40	Mid	BC		CHN	SPOD	MN, USA	NE NAM	68.1	68.1	56.7	56.7	-11.4	-0.183203	1
157	Strong	1997.1	Mg ha-1	pool	clearcut	sawlog		40	21-40	Mix	C	0-5	751-1000	40	10-40	40	Mid	BC		CHN	SPOD	MN, USA	NE NAM	68.1	68.1	51	51	-17.1	-0.289152	1
158	Knoepp and Swank	1997.3	g kg-1	conc	clearcut			50	>40	Mix	C	10.1-15	>1800	30	0-10	10		A	F	W-B	ULT	NC, USA	SE NAM	38.2	38.2	39.5	39.5	1.3	0.0334652	1
159	Knoepp and Swank	1997.3	g kg-1	conc	clearcut	WTH		14	6-20	Mix	H	10.1-15	>1800	30	0-10	10		A	F	W-B	INCEP	NC, USA	SE NAM	27.9	27.9	50.7	50.7	22.8	0.597299	1
160	Knoepp and Swank	1997.3	g kg-1	conc	clearcut	sawlog		17	6-20	Mix	H	10.1-15	>1800	30	0-10	10		A	F	W-B	INCEP	NC, USA	SE NAM	27.9	27.9	44.3	44.3	16.4	0.462358	1
161	Knoepp and Swank	1997.3	g kg-1	conc	clearcut			50	>40	Mix	C	10.1-15	>1800	30	10-30	30		BC	F	W-B	ULT	NC, USA	SE NAM	19.6	19.6	26.7	26.7	7.1	0.309134	1
162	Johnson c	1997.5	%	conc	clearcut	WTH		3	0-5	Mix	C	5-7.5	1001-1400	53	O	0	O	O	O	LOI	SPOD	44N72W	NE NAM	51.6	51.6	41.6	41.6	-10	-0.215422	1
163	Johnson c	1997.5	%	conc	clearcut	WTH		8	6-20	Mix	C	5-7.5	1001-1400	53	O	0	O	O	O	LOI	SPOD	44N72W	NE NAM	51.6	51.6	47.2	47.2	-4.4	-0.0891278	1
164	Johnson c	1997.5	%	conc	clearcut	WTH		3	0-5	Mix	C	5-7.5	1001-1400	53			Deep	BC	C	LOI	SPOD	44N72W	NE NAM	13.6	13.6	12.3	12.3	-1.3	-0.100471	1
165	Johnson c	1997.5	%	conc	clearcut	WTH		8	6-20	Mix	C	5-7.5	1001-1400	53			Deep	BC	C	LOI	SPOD	44N72W	NE NAM	13.6	13.6	15.1	15.1	1.5	0.104625	1
166	Johnson c	1997.5	%	conc	clearcut	WTH		3	0-5	Mix	C	5-7.5	1001-1400	53			Deep	BC	C	LOI	SPOD	44N72W	NE NAM	8.1	8.1	8	8	-0.1	-0.0124225	1
167	Johnson c	1997.5	%	conc	clearcut	WTH		8	6-20	Mix	C	5-7.5	1001-1400	53			Deep	BC	C	LOI	SPOD	44N72W	NE NAM	8.1	8.1	8.5	8.5	0.4	0.0482021	1
168	Johnson c	1997.5	%	conc	clearcut	WTH		3	0-5	Mix	C	5-7.5	1001-1400	53			Mid	BC	C	LOI	SPOD	44N72W	NE NAM	13.8	13.8	14.5	14.5	0.7	0.0494801	1
169	Johnson c	1997.5	%	conc	clearcut	WTH		8	6-20	Mix	C	5-7.5	1001-1400	53			Mid	BC	C	LOI	SPOD	44N72W	NE NAM	13.8	13.8	19.7	19.7	5.9	0.35595	1
170	Johnson c	1997.5	%	conc	clearcut	WTH		3	0-5	Mix	C	5-7.5	1001-1400	53			Top	A	C	LOI	SPOD	44N72W	NE NAM	14.8	14.8	24.6	24.6	9.8	0.508119	1
171	Johnson c	1997.5	%	conc	clearcut	WTH		8	6-20	Mix	C	5-7.5	1001-1400	53			Top	A	C	LOI	SPOD	44N72W	NE NAM	14.8	14.8	16.9	16.9	2.1	0.132686	1
172	Johnson c	1997.5	%	conc	clearcut	WTH		3	0-5	Mix	C	5-7.5	1001-1400	53			Top	A	C	LOI	SPOD	44N72W	NE NAM	4.6	4.6	2.9	2.9	-1.7	-0.461346	1
173	Johnson c	1997.5	%	conc	clearcut	WTH		8	6-20	Mix	C	5-7.5	1001-1400	53			Top	A	C	LOI	SPOD	44N72W	NE NAM	4.6	4.6	6.3	6.3	1.7	0.314493	1
174	Johnson c	1997.5	%	conc	clearcut	WTH		3	0-5	Mix	C	5-7.5	1001-1400	53			V_Deep	C	C	LOI	SPOD	44N72W	NE NAM	3.8	3.8	3.6	3.6	-0.2	-0.0540672	1
175	Johnson c	1997.5	%	conc	clearcut	WTH		8	6-20	Mix	C	5-7.5	1001-1400	53			V_Deep	C	C	LOI	SPOD	44N72W	NE NAM	3.8	3.8	2.9	2.9	-0.9	-0.27029	1
176	Stone and Elioff	1998.1	Mg ha-1	pool	clearcut	WTH		5	0-5	Aspen	H	0-5	751-1000	30	O	0	O	O	O	TOC	ALF	47N93W	NE NAM	21.1	21.1	19.8	19.8	-1.3	-0.0635911	1
177	Stone and Elioff	1998.1	Mg ha-1	pool	clearcut	WTH		5	0-5	Aspen	H	0-5	751-1000	30	0-10	10	Top	A	C	TOC	ALF	47N93W	NE NAM	22.5	22.5	21.7	21.7	-0.8	-0.036203	1
178	Stone and Elioff	1998.1	Mg ha-1	pool	clearcut	WTH		5	0-5	Aspen	H	0-5	751-1000	30	10-20	20	Top	A	C	TOC	ALF	47N93W	NE NAM	11.4	11.4	9.8	9.8	-1.6	-0.151231	1
179	Stone and Elioff	1998.1	Mg ha-1	pool	clearcut	WTH		5	0-5	Aspen	H	0-5	751-1000	30	20-30	30	Mid	BC	C	TOC	ALF	47N93W	NE NAM	7.6	7.6	7.8	7.8	0.2	0.0259755	1
180	Johnson and Todd	1998.2	mg kg-1	conc	clearcut	sawlog		15	6-20	Mix	H	10.1-15	1401-1800	45	0-15	15	Top	A	F	CHN	ULT	Oak Ridge	SE NAM	28.2	28.2	25.4	25.4	-2.8	-0.104573	1
181	Johnson and Todd	1998.2	mg kg-1	conc	clearcut	WTH		15	6-20	Mix	H	10.1-15	1401-1800	45	0-15	15	Top	A	F	CHN	ULT	Oak Ridge	SE NAM	28.2	28.2	26.8	26.8	-1.4	-0.0509201	1
182	Johnson and Todd	1998.2	mg kg-1	conc	clearcut	sawlog		15	6-20	Mix	H	10.1-15	1401-1800	45	15-30	30	Mid	BC	F	CHN	ULT	Oak Ridge	SE NAM	9	9	10	10	1	0.105361	1
183	Johnson and Todd	1998.2	mg kg-1	conc	clearcut	WTH		15	6-20	Mix	H	10.1-15	1401-1800	45	15-30	30	Mid	BC	F	CHN	ULT	Oak Ridge	SE NAM	9	9	11.6	11.6	2.6	0.253781	1
184	Johnson and Todd	1998.2	mg kg-1	conc	clearcut	sawlog		15	6-20	Mix	H	10.1-15	1401-1800	45	30-45	45	Deep	BC	F	CHN	ULT	Oak Ridge	SE NAM	4.9	4.9	5	5	0.1	0.0202027	1
185	Johnson and Todd	1998.2	mg kg-1	conc	clearcut	WTH		15	6-20	Mix	H	10.1-15	1401-1800	45	30-45	45	Deep	BC	F	CHN	ULT	Oak Ridge	SE NAM	4.9	4.9	7	7	2.1	0.356675	1
186	Kaye and Hart	1998.8	g m-2	pool	thin	sawlog	burn	1	0-5	Ponderosa Pine	C	5-7.5	500-750	15	O	0	O	O	O	LOI	MOLL	AZ	SW NAM	3340	33.4	5632	56.32	22.92	0.522494	1
187	Kaye and Hart	1998.8	g m-2	pool	thin	sawlog	burn	1	0-5	Ponderosa Pine	C	5-7.5	500-750	15	0-15	15	Top	A	F	LOI	MOLL	AZ	SW NAM	9251	92.51	11260	112.6	20.09	0.196525	1
188	Cromack	1999.3	Mg ha-1	pool	clearcut		burn	10	6-20	Douglas fir	C			100	O	0	O	O	O	TOC	INCEP	44N124W	NW NAM	26.5	26.5	3.71	3.71	-22.79	-1.96611	1
189	Gillon	1999.5	kg m-2	pool	thin	sawlog	burn	1	0-5	Pine	C			0	O	0	O	O	O			44N5E	EUR	1.25	12.5	0.69	6.9	-5.6	-0.594207	1
190	Gillon	1999.5	kg m-2	pool	thin	sawlog	burn	1	0-5	Pine	C			0	O	0	O	O	O			44N5E	EUR	1.25	12.5	0.59	5.9	-6.6	-0.750776	1
191	Merino and Edeso	1999.8	Mg ha-1	pool	clearcut	sawlog		1	0-5	Radiata Pine	C	10.1-15	1401-1800	15	0-15	15	Top	A	F	CHN	INCEP	N Spain	EUR	70.8	70.8	56.2326	56.2326	-14.5674	-0.230363	1
192	Merino and Edeso	1999.8	Mg ha-1	pool	clearcut	sawlog		1	0-5	Radiata Pine	C	10.1-15	1401-1800	15	0-15	15	Top	A	F	CHN	INCEP	N Spain	EUR	70.8	70.8	60.6628	60.6628	-10.1372	-0.154528	1
193	Merino and Edeso	1999.8	Mg ha-1	pool	clearcut	WTH		1	0-5	Radiata Pine	C	10.1-15	1401-1800	15	0-15	15	Top	A	F	CHN	INCEP	N Spain	EUR	70.8	70.8	42.8547	42.8547	-27.9453	-0.502045	1
194	Merino and Edeso	1999.8	Mg ha-1	pool	clearcut	WTH		1	0-5	Radiata Pine	C	10.1-15	1401-1800	15	0-15	15	Top	A	F	CHN	INCEP	N Spain	EUR	70.8	70.8	60.2791	60.2791	-10.5209	-0.160874	1
195	Merino and Edeso	1999.8	Mg ha-1	pool	clearcut	WTH	intensive	1	0-5	Radiata Pine	C	10.1-15	1401-1800	15	0-15	15	Top	A	F	CHN	INCEP	N Spain	EUR	70.8	70.8	34.1424	34.1424	-36.6576	-0.729318	1
196	Merino and Edeso	1999.8	Mg ha-1	pool	clearcut	WTH	intensive	1	0-5	Radiata Pine	C	10.1-15	1401-1800	15	0-15	15	Top	A	F	CHN	INCEP	N Spain	EUR	70.8	70.8	32.6512	32.6512	-38.1488	-0.773979	1
197	Stone	1999.9	%	conc	thin			1	0-5	Ponderosa Pine	C	5-7.5	500-750	15	0-15	15	Top	A	F	LOI	MOLL	35N112W	SW NAM	8.05	8.05	7.29	7.29	-0.76	-0.0991685	1
198	Cade-Menun	2000.2	%	conc	clearcut		burn	1	0-5	Cedar, Hemlock	C	7.6-10	1401-1800	26	O	0	O	O	O	TOC	SPOD	51N127W	NW NAM	48	48	35.5	35.5	-12.5	-0.301668	1
199	Cade-Menun	2000.2	%	conc	clearcut		burn	5	0-5	Cedar, Hemlock	C	7.6-10	1401-1800	26	O	0	O	O	O	TOC	SPOD	51N127W	NW NAM	48	48	43.8	43.8	-4.2	-0.0915672	1
200	Cade-Menun	2000.2	%	conc	clearcut		burn	10	6-20	Cedar, Hemlock	C	7.6-10	1401-1800	26	O	0	O	O	O	TOC	SPOD	51N127W	NW NAM	48	48	39	39	-9	-0.207639	1
201	Cade-Menun	2000.2	%	conc	clearcut		burn	1	0-5	Cedar, Hemlock	C	7.6-10	1401-1800	26	O	0	O	O	O	TOC	SPOD	51N127W	NW NAM	47.3	47.3	41.6	41.6	-5.7	-0.12841	1
202	Cade-Menun	2000.2	%	conc	clearcut		burn	5	0-5	Cedar, Hemlock	C	7.6-10	1401-1800	26	O	0	O	O	O	TOC	SPOD	51N127W	NW NAM	47.3	47.3	41	41	-6.3	-0.142938	1
203	Cade-Menun	2000.2	%	conc	clearcut		burn	10	6-20	Cedar, Hemlock	C	7.6-10	1401-1800	26	O	0	O	O	O	TOC	SPOD	51N127W	NW NAM	47.3	47.3	41.5	41.5	-5.8	-0.130817	1
204	Cade-Menun	2000.2	%	conc	clearcut		burn	1	0-5	Cedar, Hemlock	C	7.6-10	1401-1800	26	0-6	6	Top	BC	C	TOC	SPOD	51N127W	NW NAM	14.3	14.3	15.1	15.1	0.8	0.0544352	1
205	Cade-Menun	2000.2	%	conc	clearcut		burn	5	0-5	Cedar, Hemlock	C	7.6-10	1401-1800	26	0-6	6	Top	BC	C	TOC	SPOD	51N127W	NW NAM	14.3	14.3	19.4	19.4	5.1	0.305014	1
206	Cade-Menun	2000.2	%	conc	clearcut		burn	10	6-20	Cedar, Hemlock	C	7.6-10	1401-1800	26	0-6	6	Top	BC	C	TOC	SPOD	51N127W	NW NAM	14.3	14.3	16.7	16.7	2.4	0.155149	1
207	Cade-Menun	2000.2	%	conc	clearcut		burn	1	0-5	Cedar, Hemlock	C	7.6-10	1401-1800	26	6-26	26	Mid	BC	C	TOC	SPOD	51N127W	NW NAM	6.7	6.7	6.2	6.2	-0.5	-0.0775582	1
208	Cade-Menun	2000.2	%	conc	clearcut		burn	5	0-5	Cedar, Hemlock	C	7.6-10	1401-1800	26	6-26	26	Mid	BC	C	TOC	SPOD	51N127W	NW NAM	6.7	6.7	5.1	5.1	-1.6	-0.272867	1
209	Cade-Menun	2000.2	%	conc	clearcut		burn	10	6-20	Cedar, Hemlock	C	7.6-10	1401-1800	26	6-26	26	Mid	BC	C	TOC	SPOD	51N127W	NW NAM	6.7	6.7	4.1	4.1	-2.6	-0.491121	1
210	Deluca and Zouhar	2000.3	g kg-1	conc	clearcut			2	0-5	Pine, Fir	C	5-7.5	<500	7.5	0-7.5	7.5	Top	A	C	CHN	INCEP	Montana	NW NAM	20.7	20.7	21.3	21.3	0.6	0.0285734	1
211	Deluca and Zouhar	2000.3	g kg-1	conc	clearcut		remove	2	0-5	Pine, Fir	C	5-7.5	<500	7.5	0-7.5	7.5	Top	A	C	CHN	INCEP	Montana	NW NAM	20.7	20.7	21.5	21.5	0.8	0.0379192	1
212	Deluca and Zouhar	2000.3	g kg-1	conc	clearcut			11	6-20	Pine, Fir	C	5-7.5	500-750	7.5	0-7.5	7.5	Top	A	C	CHN	INCEP	Montana	NW NAM	29.1	29.1	33.3	33.3	4.2	0.134819	1
213	Deluca and Zouhar	2000.3	g kg-1	conc	clearcut		remove	11	6-20	Pine, Fir	C	5-7.5	500-750	7.5	0-7.5	7.5	Top	A	C	CHN	INCEP	Montana	NW NAM	29.1	29.1	22.9	22.9	-6.2	-0.239601	1
214	Deluca and Zouhar	2000.3	g kg-1	conc	clearcut			1	0-5	Pine, Fir	C	5-7.5	500-750	10	0-10	10	Top	A	F	CHN	ALF	Montana	NW NAM	7.3	7.3	6.7	6.7	-0.6	-0.0857668	1
215	Deluca and Zouhar	2000.3	g kg-1	conc	clearcut		remove	1	0-5	Pine, Fir	C	5-7.5	500-750	10	0-10	10	Top	A	F	CHN	ALF	Montana	NW NAM	7.3	7.3	10.2	10.2	2.9	0.334513	1
216	Yanai	2000.9	Mg ha-1	pool	clearcut			1	0-5	Mix	H	5-7.5	1001-1400	0	O	0	O	O	O	LOI	SPOD	44N72W	NE NAM	78.5	78.5	60	60	-18.5	-0.268754	1
217	Yanai	2000.9	Mg ha-1	pool	clearcut			1	0-5	Mix	H	5-7.5	1001-1400	0	O	0	O	O	O	LOI	SPOD	44N72W	NE NAM	78.5	78.5	47	47	-31.5	-0.512951	1
218	Yanai	2000.9	Mg ha-1	pool	clearcut			4	0-5	Mix	H	5-7.5	1001-1400	0	O	0	O	O	O	LOI	SPOD	44N72W	NE NAM	78.5	78.5	38	38	-40.5	-0.725512	1
219	Yanai	2000.9	Mg ha-1	pool	clearcut			10	6-20	Mix	H	5-7.5	1001-1400	0	O	0	O	O	O	LOI	SPOD	44N72W	NE NAM	78.5	78.5	30	30	-48.5	-0.961901	1
220	Yanai	2000.9	Mg ha-1	pool	clearcut			12	6-20	Mix	H	5-7.5	1001-1400	0	O	0	O	O	O	LOI	SPOD	44N72W	NE NAM	78.5	78.5	46	46	-32.5	-0.534457	1
221	Yanai	2000.9	Mg ha-1	pool	clearcut			23	21-40	Mix	H	5-7.5	1001-1400	0	O	0	O	O	O	LOI	SPOD	44N72W	NE NAM	78.5	78.5	40	40	-38.5	-0.674219	1
222	Yanai	2000.9	Mg ha-1	pool	clearcut			31	21-40	Mix	H	5-7.5	1001-1400	0	O	0	O	O	O	LOI	SPOD	44N72W	NE NAM	78.5	78.5	53	53	-25.5	-0.392807	1
223	Yanai	2000.9	Mg ha-1	pool	clearcut			32	21-40	Mix	H	5-7.5	1001-1400	0	O	0	O	O	O	LOI	SPOD	44N72W	NE NAM	78.5	78.5	36	36	-42.5	-0.77958	1
224	Yanai	2000.9	Mg ha-1	pool	clearcut			40	21-40	Mix	H	5-7.5	1001-1400	0	O	0	O	O	O	LOI	SPOD	44N72W	NE NAM	78.5	78.5	52	52	-26.5	-0.411855	1
225	Yanai	2000.9	Mg ha-1	pool	clearcut			45	>40	Mix	H	5-7.5	1001-1400	0	O	0	O	O	O	LOI	SPOD	44N72W	NE NAM	78.5	78.5	47	47	-31.5	-0.512951	1
226	Yanai	2000.9	Mg ha-1	pool	clearcut			70	>40	Mix	H	5-7.5	1001-1400	0	O	0	O	O	O	LOI	SPOD	44N72W	NE NAM	78.5	78.5	63	63	-15.5	-0.219964	1
227	Yanai	2000.9	Mg ha-1	pool	clearcut			16	6-20	Mix	H	5-7.5	1001-1400	0	O	0	O	O	O	LOI	SPOD	44N72W	NE NAM	74.5	74.5	55	55	-19.5	-0.303466	1
228	Yanai	2000.9	Mg ha-1	pool	clearcut			16	6-20	Mix	H	5-7.5	1001-1400	0	O	0	O	O	O	LOI	SPOD	44N72W	NE NAM	74.5	74.5	52	52	-22.5	-0.359555	1
229	Yanai	2000.9	Mg ha-1	pool	clearcut			19	6-20	Mix	H	5-7.5	1001-1400	0	O	0	O	O	O	LOI	SPOD	44N72W	NE NAM	74.5	74.5	45	45	-29.5	-0.504137	1
230	Yanai	2000.9	Mg ha-1	pool	clearcut			25	21-40	Mix	H	5-7.5	1001-1400	0	O	0	O	O	O	LOI	SPOD	44N72W	NE NAM	74.5	74.5	42	42	-32.5	-0.57313	1
231	Yanai	2000.9	Mg ha-1	pool	clearcut			27	21-40	Mix	H	5-7.5	1001-1400	0	O	0	O	O	O	LOI	SPOD	44N72W	NE NAM	74.5	74.5	48	48	-26.5	-0.439598	1
232	Yanai	2000.9	Mg ha-1	pool	clearcut			38	21-40	Mix	H	5-7.5	1001-1400	0	O	0	O	O	O	LOI	SPOD	44N72W	NE NAM	74.5	74.5	32	32	-42.5	-0.845063	1
233	Yanai	2000.9	Mg ha-1	pool	clearcut			46	>40	Mix	H	5-7.5	1001-1400	0	O	0	O	O	O	LOI	SPOD	44N72W	NE NAM	74.5	74.5	63	63	-11.5	-0.167664	1
234	Yanai	2000.9	Mg ha-1	pool	clearcut			47	>40	Mix	H	5-7.5	1001-1400	0	O	0	O	O	O	LOI	SPOD	44N72W	NE NAM	74.5	74.5	35	35	-39.5	-0.755451	1
235	Yanai	2000.9	Mg ha-1	pool	clearcut			55	>40	Mix	H	5-7.5	1001-1400	0	O	0	O	O	O	LOI	SPOD	44N72W	NE NAM	74.5	74.5	61	61	-13.5	-0.199925	1
236	Yanai	2000.9	Mg ha-1	pool	clearcut			60	>40	Mix	H	5-7.5	1001-1400	0	O	0	O	O	O	LOI	SPOD	44N72W	NE NAM	74.5	74.5	35	35	-39.5	-0.755451	1
237	Yanai	2000.9	Mg ha-1	pool	clearcut			85	>40	Mix	H	5-7.5	1001-1400	0	O	0	O	O	O	LOI	SPOD	44N72W	NE NAM	74.5	74.5	95	95	20.5	0.243078	1
238	Yanai	2000.9	Mg ha-1	pool	clearcut			2	0-5	Mix	H	5-7.5	1001-1400	0	O	0	O	O	O	LOI	SPOD		NE NAM	89	89	64	64	-25	-0.329753	1
239	Yanai	2000.9	Mg ha-1	pool	clearcut			3	0-5	Mix	H	5-7.5	1001-1400	0	O	0	O	O	O	LOI	SPOD		NE NAM	89	89	57	57	-32	-0.445585	1
240	Yanai	2000.9	Mg ha-1	pool	clearcut			6	6-20	Mix	H	5-7.5	1001-1400	0	O	0	O	O	O	LOI	SPOD		NE NAM	89	89	60	60	-29	-0.394292	1
241	Yanai	2000.9	Mg ha-1	pool	clearcut			10	6-20	Mix	H	5-7.5	1001-1400	0	O	0	O	O	O	LOI	SPOD		NE NAM	89	89	52	52	-37	-0.537393	1
242	Yanai	2000.9	Mg ha-1	pool	clearcut			17	6-20	Mix	H	5-7.5	1001-1400	0	O	0	O	O	O	LOI	SPOD		NE NAM	89	89	30	30	-59	-1.08744	1
243	Yanai	2000.9	Mg ha-1	pool	clearcut			18	6-20	Mix	H	5-7.5	1001-1400	0	O	0	O	O	O	LOI	SPOD		NE NAM	89	89	41	41	-48	-0.775064	1
244	Yanai	2000.9	Mg ha-1	pool	clearcut			21	21-40	Mix	H	5-7.5	1001-1400	0	O	0	O	O	O	LOI	SPOD		NE NAM	89	89	35	35	-54	-0.933288	1
245	Yanai	2000.9	Mg ha-1	pool	clearcut			29	21-40	Mix	H	5-7.5	1001-1400	0	O	0	O	O	O	LOI	SPOD		NE NAM	89	89	60	60	-29	-0.394292	1
246	Yanai	2000.9	Mg ha-1	pool	clearcut			34	21-40	Mix	H	5-7.5	1001-1400	0	O	0	O	O	O	LOI	SPOD		NE NAM	89	89	58	58	-31	-0.428193	1
247	Yanai	2000.9	Mg ha-1	pool	clearcut			39	21-40	Mix	H	5-7.5	1001-1400	0	O	0	O	O	O	LOI	SPOD		NE NAM	89	89	67	67	-22	-0.283944	1
248	Yanai	2000.9	Mg ha-1	pool	clearcut			43	>40	Mix	H	5-7.5	1001-1400	0	O	0	O	O	O	LOI	SPOD		NE NAM	89	89	75	75	-14	-0.171148	1
249	Yanai	2000.9	Mg ha-1	pool	clearcut			48	>40	Mix	H	5-7.5	1001-1400	0	O	0	O	O	O	LOI	SPOD		NE NAM	89	89	80	80	-9	-0.10661	1
250	Yanai	2000.9	Mg ha-1	pool	clearcut			56	>40	Mix	H	5-7.5	1001-1400	0	O	0	O	O	O	LOI	SPOD		NE NAM	89	89	72	72	-17	-0.21197	1
251	Law	2001.11	kg m-2	pool	clearcut			21	21-40	Ponderosa Pine	C	7.6-10	500-750	100	0-20	20	Top	A	C	CHN	ALF	44N122W	NW NAM	2.79	27.9	2.62	26.2	-1.7	-0.0628673	1
252	Law	2001.11	kg m-2	pool	clearcut			21	21-40	Ponderosa Pine	C	7.6-10	500-750	100	20-50	50	Deep	BC	C	CHN	ALF	44N122W	NW NAM	1.65	16.5	0.84	8.4	-8.1	-0.675129	1
253	Law	2001.11	kg m-2	pool	clearcut			21	21-40	Ponderosa Pine	C	7.6-10	500-750	100	50-100	100	V_Deep	BC	C	CHN	ALF	44N122W	NW NAM	1.44	14.4	0.86	8.6	-5.8	-0.515466	1
254	Dai	2001.15	g kg-1	conc	clearcut	WTH		14	6-20	Mix	H			70		0	O	O	O	CHN	SPOD	44N72W	NE NAM	187.9	187.9	259.6	259.6	71.7	0.323232	1
255	Dai	2001.15	g kg-1	conc	clearcut	WTH		14	6-20	Mix	H			70	0-3	3	Top	A	C	CHN	SPOD	44N72W	NE NAM	120.4	120.4	73.6	73.6	-46.8	-0.492175	1
256	Dai	2001.15	g kg-1	conc	clearcut	WTH		14	6-20	Mix	H			70	3-8	8	Top	A	C	CHN	SPOD	44N72W	NE NAM	80.6	80.6	67.8	67.8	-12.8	-0.172936	1
257	Griffiths and Swanson	2001.17	%	conc	clearcut	sawlog	burn	5	0-5	Douglas fir	C			10	0-10	10	Top	A	C	LOI	INCEP	HJ Andrews	NW NAM	24.4	24.4	23.8	23.8	-0.6	-0.0248976	1
258	Griffiths and Swanson	2001.17	%	conc	clearcut	sawlog	burn	15	6-20	Douglas fir	C			10	0-10	10	Top	A	C	LOI	INCEP	HJ Andrews	NW NAM	24.4	24.4	24.2	24.2	-0.2	-0.0082305	1
259	Griffiths and Swanson	2001.17	%	conc	clearcut	sawlog	burn	40	21-40	Douglas fir	C			10	0-10	10	Top	A	C	LOI	INCEP	HJ Andrews	NW NAM	24.4	24.4	24	24	-0.4	-0.0165293	1
260	Goodale and Aber	2001.8	Mg ha-1	pool	clearcut			85	>40	Mix	H	0-5	1001-1400	10	O	0	O	O	O	CHN	SPOD	NH	NE NAM	16	16	25	25	9	0.446287	1
261	Goodale and Aber	2001.8	Mg ha-1	pool	clearcut			85	>40	Mix	H	0-5	1001-1400	10	0-10	10	Top	A	C	CHN	SPOD	NH	NE NAM	33	33	37	37	4	0.11441	1
262	Holscher	2001.9	Mg ha-1	pool	clearcut			22	21-40	Mix	H	5-7.5	1001-1400	20	O	0	O	O	O	CHN	SPOD	51N8E	EUR	27.5	27.5	4.6	4.6	-22.9	-1.78813	1
263	Holscher	2001.9	Mg ha-1	pool	clearcut			22	21-40	Mix	H	5-7.5	1001-1400	20	0-20	20	Top	A	C	CHN	SPOD	51N8E	EUR	58.9	58.9	55.3	55.3	-3.6	-0.0630682	1
264	Klopatek	2002.13	Mg ha-1	pool	clearcut	sawlog		20	6-20	Douglas fir	C	7.6-10	>1800	20	O	0	O	O	O	CHN	AND	Wind River	NW NAM	13.6	13.6	12	12	-1.6	-0.125163	1
265	Klopatek	2002.13	Mg ha-1	pool	clearcut	sawlog		40	21-40	Douglas fir	C	7.6-10	>1800	20	O	0	O	O	O	CHN	AND	Wind River	NW NAM	13.6	13.6	16.1	16.1	2.5	0.168749	1
266	Klopatek	2002.13	Mg ha-1	pool	clearcut	sawlog		20	6-20	Douglas fir	C	7.6-10	>1800	20	0-10	10	Top	A	C	CHN	AND	Wind River	NW NAM	56.8	56.8	73	73	16.2	0.250923	1
267	Klopatek	2002.13	Mg ha-1	pool	clearcut	sawlog		40	21-40	Douglas fir	C	7.6-10	>1800	20	0-10	10	Top	A	C	CHN	AND	Wind River	NW NAM	56.8	56.8	94.2	94.2	37.4	0.505884	1
268	Klopatek	2002.13	Mg ha-1	pool	clearcut	sawlog		20	6-20	Douglas fir	C	7.6-10	>1800	20	10-20	20	Mid	A	C	CHN	AND	Wind River	NW NAM	40.6	40.6	84	84	43.4	0.727049	1
269	Klopatek	2002.13	Mg ha-1	pool	clearcut	sawlog		40	21-40	Douglas fir	C	7.6-10	>1800	20	10-20	20	Mid	A	C	CHN	AND	Wind River	NW NAM	40.6	40.6	80.3	80.3	39.7	0.682002	1
270	Carter	2002.2	Mg ha-1	pool	thin	sawlog	intensive	2	0-5	Loblolly Pine	C	16-20	1001-1400	15	0-15	15	Top	A	F	CHN	ULT	31N91W	SE NAM	33	33	29.6	29.6	-3.4	-0.108733	1
271	Carter	2002.2	Mg ha-1	pool	clearcut	WTH	intensive	2	0-5	Loblolly Pine	C	16-20	1001-1400	15	0-15	15	Top	A	F	CHN	ULT	31N91W	SE NAM	34.9	34.9	32.4	32.4	-2.5	-0.0743284	1
272	Carter	2002.2	Mg ha-1	pool	thin	sawlog	intensive	2	0-5	Loblolly Pine	C	16-20	1001-1400	15	0-15	15	Top	A	F	CHN	ULT	31N94W	SE NAM	24.6	24.6	20.4	20.4	-4.2	-0.187212	1
273	Carter	2002.2	Mg ha-1	pool	clearcut	WTH	intensive	2	0-5	Loblolly Pine	C	16-20	1001-1400	15	0-15	15	Top	A	F	CHN	ULT	31N94W	SE NAM	23.8	23.8	23.1	23.1	-0.7	-0.029853	1
274	Carter	2002.2	Mg ha-1	pool	thin	sawlog	intensive	1	0-5	Loblolly Pine	C	16-20	1001-1400	15	0-15	15	Top	A	F	CHN	ULT	31N94W	SE NAM	24.6	24.6	16.1	16.1	-8.5	-0.423927	1
275	Carter	2002.2	Mg ha-1	pool	clearcut	WTH	intensive	1	0-5	Loblolly Pine	C	16-20	1001-1400	15	0-15	15	Top	A	F	CHN	ULT	31N94W	SE NAM	23.8	23.8	17	17	-6.8	-0.336472	1
276	Carter	2002.2	Mg ha-1	pool	thin	sawlog	intensive	1	0-5	Loblolly Pine	C	16-20	1001-1400	15	0-15	15	Top	A	F	CHN	ULT	31N91W	SE NAM	33	33	24.6	24.6	-8.4	-0.293761	1
277	Carter	2002.2	Mg ha-1	pool	clearcut	WTH	intensive	1	0-5	Loblolly Pine	C	16-20	1001-1400	15	0-15	15	Top	A	F	CHN	ULT	31N91W	SE NAM	34.9	34.9	26.7	26.7	-8.2	-0.267823	1
278	Gresham	2002.4	Mg ha-1	pool	clearcut	sawlog	intensive	10	6-20	Loblolly Pine	C	16-20	1001-1400	30	0-30	30	Mid	ABC	F		ULT		SE NAM	131.7	131.7	131.6	131.6	-0.1	-0.00075959	1
279	Gresham	2002.4	Mg ha-1	pool	clearcut	sawlog	intensive	10	6-20	Loblolly Pine	C	16-20	1001-1400	30	0-30	30	Mid	ABC	F		ULT		SE NAM	131.7	131.7	110	110	-21.7	-0.180046	1
280	Gresham	2002.4	Mg ha-1	pool	clearcut	sawlog	herbicide	10	6-20	Loblolly Pine	C	16-20	1001-1400	30	0-30	30	Mid	ABC	F		ULT		SE NAM	131.7	131.7	93.7	93.7	-38	-0.340428	1
281	Gresham	2002.4	Mg ha-1	pool	clearcut	sawlog	intensive	10	6-20	Loblolly Pine	C	16-20	1001-1400	30	0-30	30	Mid	ABC	F		ULT		SE NAM	81.6	81.6	94.7	94.7	13.1	0.148885	1
282	Gresham	2002.4	Mg ha-1	pool	clearcut	sawlog	intensive	10	6-20	Loblolly Pine	C	16-20	1001-1400	30	0-30	30	Mid	ABC	F		ULT		SE NAM	81.6	81.6	101.1	101.1	19.5	0.214281	1
283	Gresham	2002.4	Mg ha-1	pool	clearcut	sawlog	herbicide	10	6-20	Loblolly Pine	C	16-20	1001-1400	30	0-30	30	Mid	ABC	F		ULT		SE NAM	81.6	81.6	80.1	80.1	-1.5	-0.0185534	1
284	Riley and Jones	2003.14	%	conc	clearcut		burn	1	0-5	Pine	C	16-20	1001-1400	10	0-10	10	Top	A	C	CHN	ULT		SE NAM	0.75	0.75	0.59	0.59	-0.16	-0.239951	1
285	Riley and Jones	2003.14	%	conc	clearcut		burn	1	0-5	Pine	C	16-20	1001-1400	10	0-10	10	Top	A	C	CHN	ULT		SE NAM	0.64	0.64	0.39	0.39	-0.25	-0.495321	1
286	Riley and Jones	2003.14	%	conc	clearcut		intensive	1	0-5	Pine	C	16-20	1001-1400	10	0-10	10	Top	A	F	CHN	ULT		SE NAM	1.31	1.31	0.92	0.92	-0.39	-0.353409	1
287	Waldrop	2003.18	g kg-1	conc	clearcut	sawlog	retain	1	0-5	Mix	C	10.1-15	1001-1400	0	O	0	O	O	O	CHN	ALF	39N121W	SW NAM	390	390	370	370	-20	-0.0526437	1
288	Waldrop	2003.18	g kg-1	conc	clearcut	sawlog	intensive	1	0-5	Mix	C	10.1-15	1001-1400	0	O	0	O	O	O	CHN	ALF	39N121W	SW NAM	390	390	420	420	30	0.074108	1
289	Waldrop	2003.18	g kg-1	conc	clearcut	sawlog	burn	1	0-5	Mix	C	10.1-15	1001-1400	0	O	0	O	O	O	CHN	ALF	39N121W	SW NAM	390	390	390	390	0	0	1
290	Zhong and Makeshin	2003.19	Mg ha-1	pool	clearcut			16	6-20	Spruce	C	7.6-10	751-1000	10	O	0	O	O	O	CHN	INCEP	51N14E	EUR	124.2	124.2	73	73	-51.2	-0.531434	1
291	Zhong and Makeshin	2003.19	Mg ha-1	pool	clearcut			16	6-20	Spruce	C	7.6-10	751-1000	10	0-10	10	Top	A	C	CHN	INCEP	51N14E	EUR	40.2	40.2	55.6	55.6	15.4	0.324316	1
292	Law	2003.23	g m-2	pool	clearcut	sawlog		23	21-40	Ponderosa Pine	C	7.6-10	500-750	100	0-100	100	Whole	ABC		CHN		44N122W	NW NAM	6496	64.96	6918	69.18	4.22	0.0629401	1
293	Law	2003.23	g m-2	pool	clearcut	sawlog		9	6-20	Ponderosa Pine	C	7.6-10	500-750	100	0-100	100	Whole	ABC		CHN		44N122W	NW NAM	6496	64.96	12686	126.86	61.9	0.669312	1
294	Law	2003.23	g m-2	pool	clearcut	sawlog		16	6-20	Ponderosa Pine	C	7.6-10	500-750	100	0-100	100	Whole	ABC		CHN		44N122W	NW NAM	6496	64.96	5380	53.8	-11.16	-0.188498	1
295	Law	2003.23	g m-2	pool	clearcut	sawlog		69	>40	Ponderosa Pine	C	7.6-10	500-750	100	0-100	100	Whole	ABC		CHN		44N122W	NW NAM	6496	64.96	4060	40.6	-24.36	-0.470004	1
296	Law	2003.23	g m-2	pool	clearcut	sawlog		56	>40	Ponderosa Pine	C	7.6-10	500-750	100	0-100	100	Whole	ABC		CHN		44N122W	NW NAM	6496	64.96	7634	76.34	11.38	0.161425	1
297	Law	2003.23	g m-2	pool	clearcut	sawlog		89	>40	Ponderosa Pine	C	7.6-10	500-750	100	0-100	100	Whole	ABC		CHN		44N122W	NW NAM	6496	64.96	7868	78.68	13.72	0.191617	1
298	Law	2003.23	g m-2	pool	clearcut	sawlog		106	>40	Ponderosa Pine	C	7.6-10	500-750	100	0-100	100	Whole	ABC		CHN		44N122W	NW NAM	6496	64.96	9699	96.99	32.03	0.400836	1
299	Law	2003.23	g m-2	pool	clearcut			93	>40	Ponderosa Pine	C	7.6-10	500-750	100	0-100	100	Whole	ABC		CHN		44N122W	NW NAM	6496	64.96	6906	69.06	4.1	0.061204	1
300	Law	2003.23	g m-2	pool	clearcut			96	>40	Ponderosa Pine	C	7.6-10	500-750	100	0-100	100	Whole	ABC		CHN		44N122W	NW NAM	6496	64.96	7361	73.61	8.65	0.125009	1
301	Neher	2003.25	%	conc				1	0-5	Pine	C	10.1-15	1001-1400	20	0-20	20	Top	A	F	LOI	ULT	NC, USA	SE US	5.8	5.8	4.9	4.9	-0.9	-0.168623	1
302	Neher	2003.25	%	conc				2	0-5	Pine	C	10.1-15	1001-1400	20	0-20	20	Top	A	F	LOI	ULT	NC, USA	SE US	6.7	6.7	5.1	5.1	-1.6	-0.272867	1
303	Neher	2003.25	%	conc				2	0-5	Pine	C	15.1-20	1001-1400	20	0-20	20	Top	A	F	LOI	ULT	NC, USA	SE US	2.2	2.2	4.9	4.9	2.7	0.800778	1
304	O'Brien	2003.26	tonnes ha-1	pool	clearcut		burn	10	6-20	Ash	H		1001-1400	50	0-50	50	Whole	ABC	F	W-B		38S146E	PAC	285	285	219	219	-66	-0.263417	1
305	O'Brien	2003.26	tonnes ha-1	pool	clearcut		burn	11	6-20	Ash	H		1001-1400	50	0-50	50	Whole	ABC	F	W-B		38S146E	PAC	285	285	288	288	3	0.0104713	1
306	O'Brien	2003.26	tonnes ha-1	pool	clearcut		burn	12	6-20	Ash	H		1001-1400	50	0-50	50	Whole	ABC	F	W-B		38S146E	PAC	285	285	328	328	43	0.140524	1
307	O'Brien	2003.26	tonnes ha-1	pool	clearcut		burn	25	21-40	Ash	H		1001-1400	50	0-50	50	Whole	ABC	F	W-B		38S146E	PAC	285	285	224	224	-61	-0.240843	1
308	O'Brien	2003.26	tonnes ha-1	pool	clearcut		burn	25	21-40	Ash	H		1001-1400	50	0-50	50	Whole	ABC	F	W-B		38S146E	PAC	285	285	236	236	-49	-0.188657	1
309	O'Brien	2003.26	tonnes ha-1	pool	clearcut		burn	26	21-40	Ash	H		1001-1400	50	0-50	50	Whole	ABC	F	W-B		38S146E	PAC	285	285	284	284	-1	-0.00351494	1
310	Sanscrainte	2003.28	Mg ha-1	pool	clearcut	sawlog	burn		21-40	Mix	C	0-5	>1800	70	O	0	O	O	O	CHN	SPOD	WA, USA	NW NAM	48.8	48.8	29.5	29.5	-19.3	-0.50334	1	Time from harvesting estimated using sampling year of 2000
311	Sanscrainte	2003.28	Mg ha-1	pool	clearcut	sawlog	retain		21-40	Mix	C	0-5	>1800	70	O	0	O	O	O	CHN	SPOD	WA, USA	NW NAM	48.8	48.8	30.6	30.6	-18.2	-0.46673	1	Time from harvesting estimated using sampling year of 2000
312	Sanscrainte	2003.28	Mg ha-1	pool	clearcut	sawlog	burn		21-40	Mix	C	0-5	>1800	70	0-70	70	Whole	ABC	F	CHN	SPOD	WA, USA	NW NAM	95.4	95.4	114.2	114.2	18.8	0.179873	1	Time from harvesting estimated using sampling year of 2000
313	Sanscrainte	2003.28	Mg ha-1	pool	clearcut	sawlog	retain		21-40	Mix	C	0-5	>1800	70	0-70	70	Whole	ABC	F	CHN	SPOD	WA, USA	NW NAM	95.4	95.4	148.4	148.4	53	0.441833	1	Time from harvesting estimated using sampling year of 2000
314	Herman	2003.3	Mg ha-1	pool	clearcut			7	6-20	Oak	H	10.1-15	500-750	9	0-9	9	Top	A	F	CHN	ALF	39N121W	SW NAM	79.3	79.3	36.9	36.9	-42.4	-0.765027	1
315	Herman	2003.3	Mg ha-1	pool	clearcut			9	6-20	Oak	H	10.1-15	500-750	9	0-9	9	Top	A	F	CHN	ALF	39N121W	SW NAM	79.3	79.3	33.8	33.8	-45.5	-0.852777	1
316	Laiho	2003.6	Mg ha-1	pool	clearcut	sawlog	retain	5	0-5	Mix	C	15.1-20	1401-1800	10	0-10	10	Top	A	F	CHN	ULT	31N92W	SE NAM	18	18	18	18	0	0	1
317	Laiho	2003.6	Mg ha-1	pool	clearcut	WTH	remove	5	0-5	Mix	C	15.1-20	1401-1800	10	0-10	10	Top	A	F	CHN	ULT	31N92W	SE NAM	18	18	15	15	-3	-0.182322	1
318	Laiho	2003.6	Mg ha-1	pool	clearcut	sawlog	retain	5	0-5	Mix	C	15.1-20	1001-1400	30	0-30	30	Top	ABC	F	CHN	ULT	35N76W	SE NAM	52	52	62	62	10	0.175891	1
319	Laiho	2003.6	Mg ha-1	pool	clearcut	WTH	remove	5	0-5	Mix	C	15.1-20	1001-1400	30	0-30	30	Top	ABC	F	CHN	ULT	35N76W	SE NAM	52	52	55	55	3	0.0560895	1
320	Laiho	2003.6	Mg ha-1	pool	clearcut	WTH	intensive	5	0-5	Mix	C	15.1-20	1001-1400	30	0-30	30	Top	ABC	F	CHN	ULT	35N76W	SE NAM	52	52	74	74	22	0.352821	1
321	May and Attiwill	2003.8	tonnes ha-1	pool	clearcut	sawlog	retain	5	0-5	Ash	H	7.6-10	>1800	10	0-10	10	Top	A	F	W-B	ULT	38S146E	PAC	43.2	43.2	43.5	43.5	0.3	0.00692044	1
322	May and Attiwill	2003.8	tonnes ha-1	pool	clearcut	sawlog	burn	5	0-5	Ash	H	7.6-10	>1800	10	0-10	10	Top	A	F	W-B	ULT	38S146E	PAC	43.2	43.2	36.1	36.1	-7.1	-0.179548	1
323	Kelliher	2004.19	g kg-1	conc	clearcut	sawlog		22	21-40	Ponderosa Pine	C	5-7.5	500-750	50	O	0	O	O	O	CHN	AND	44N121W	NW NAM	474	474	481	481	7	0.0146599	1
324	Kelliher	2004.19	g kg-1	conc	clearcut	sawlog		22	21-40	Ponderosa Pine	C	5-7.5	500-750	50	0-10	10	Top	A	C	CHN	AND	44N121W	NW NAM	23	23	23	23	0	0	1
325	Kelliher	2004.19	g kg-1	conc	clearcut	sawlog		22	21-40	Ponderosa Pine	C	5-7.5	500-750	50	10-30	30	Mid	BC	C	CHN	AND	44N121W	NW NAM	8	8	9.9	9.9	1.9	0.213093	1
326	Kelliher	2004.19	g kg-1	conc	clearcut	sawlog		22	21-40	Ponderosa Pine	C	5-7.5	500-750	50	30-50	50	Deep	BC	C	CHN	AND	44N121W	NW NAM	6.4	6.4	8	8	1.6	0.223144	1
327	Korb	2004.21	%	conc	thin	sawlog	burn	1	0-5	Ponderosa Pine	C	7.6-10	500-750	10	0-10	10	Top	A	F	LOI	MOLL	35N111W	NW NAM	11.3	11.3	8.7	8.7	-2.6	-0.26148	1
328	Bauhus	2004.22	kg m-2	pool	clearcut	WTH	retain	9	6-20	Beech	H	5-7.5	1001-1400	40	O	0	O	O	O	CHN	INCEP	51N9E	EUR	1.7	17	1.5	15	-2	-0.125163	1	data and units needed fixing, though proportions were correct
329	Bauhus	2004.22	kg m-2	pool	clearcut	WTH	lime	9	6-20	Beech	H	5-7.5	1001-1400	40	O	0	O	O	O	CHN	INCEP	51N9E	EUR	1.7	17	0.6	6	-11	-1.04145	1	data and units needed fixing, though proportions were correct
330	Bauhus	2004.22	kg m-2	pool	clearcut	WTH	retain	9	6-20	Beech	H	5-7.5	1001-1400	40	0-10	10	Top	A	F	CHN	INCEP	51N9E	EUR	4.54	45.4	3.9	39	-6.4	-0.15195	1	data and units needed fixing, though proportions were correct
331	Bauhus	2004.22	kg m-2	pool	clearcut	WTH	lime	9	6-20	Beech	H	5-7.5	1001-1400	40	0-10	10	Top	A	F	CHN	INCEP	51N9E	EUR	4.54	45.4	5.93	59.3	13.9	0.267097	1	data and units needed fixing, though proportions were correct
332	Bauhus	2004.22	kg m-2	pool	clearcut	WTH	retain	9	6-20	Beech	H	5-7.5	1001-1400	40	10-40	40	Mid	BC	F	CHN	INCEP	51N9E	EUR	4.13	41.3	3.38	33.8	-7.5	-0.200402	1	data and units needed fixing, though proportions were correct
333	Bauhus	2004.22	kg m-2	pool	clearcut	WTH	lime	9	6-20	Beech	H	5-7.5	1001-1400	40	10-40	40	Mid	BC	F	CHN	INCEP	51N9E	EUR	4.13	41.3	3.84	38.4	-2.9	-0.072805	1	data and units needed fixing, though proportions were correct
334	Prietzel	2004.27	Mg ha-1	pool	clearcut	sawlog	retain	2	0-5	Douglas fir	C	7.6-10	751-1000	0	O	0	O	O	O	CHN	ALF	46N122W	NW NAM	14	14	11	11	-3	-0.241162	1
335	Prietzel	2004.27	Mg ha-1	pool	clearcut	sawlog	retain	1	0-5	Douglas fir	C	7.6-10	751-1000	0	O	0	O	O	O	CHN	INCEP	47N122W	NW NAM	11.4	11.4	16.2	16.2	4.8	0.351398	1
336	Prietzel	2004.27	Mg ha-1	pool	clearcut	sawlog	retain	1	0-5	Douglas fir	C	7.6-10	1401-1800	0	O	0	O	O	O	CHN	INCEP	47N123W	NW NAM	11.4	11.4	12.8	12.8	1.4	0.115832	1
337	Prietzel	2004.27	Mg ha-1	pool	clearcut	sawlog	retain	1	0-5	Douglas fir	C	7.6-10	>1800	0	O	0	O	O	O	CHN	INCEP	47N123W	NW NAM	11.4	11.4	9.1	9.1	-2.3	-0.225339	1
338	Latty	2004.39	Mg ha-1	pool	thin			90	>40	Mix	H	5-7.5	751-1000	15	O	0	O	O	O	CHN	SPOD	44N74W	NE NAM	24.1	24.1	24.5	24.5	0.4	0.0164613	1
339	Latty	2004.39	Mg ha-1	pool	thin			90	>40	Mix	H	5-7.5	751-1000	15	0-15	15	Top	A	F	CHN	SPOD	44N74W	NE NAM	42.6	42.6	29	29	-13.6	-0.384558	1
340	Maassen and Wirth	2004.4	%	conc	thin					Pine	C			5	O	0	O	O	O	CHN		Germany	EUR	26.2	26.2	25.8	25.8	-0.4	-0.0153849	1
341	Maassen and Wirth	2004.4	%	conc	thin					Pine	C			5	0-5	5	Top	A	C	CHN		Germany	EUR	6.95	6.95	9.17	9.17	2.22	0.277196	1
342	Shelburne	2004.41	%	conc	thin	sawlog	retain	1	0-5	Pine	C			10	O	0	O	O	O	CHN	ULT	SC, USA	SE NAM	25	25	20.3	20.3	-4.7	-0.208255	1
343	Shelburne	2004.41	%	conc	thin	sawlog	burn	1	0-5	Pine	C			10	O	0	O	O	O	CHN	ULT	SC, USA	SE NAM	25	25	16.3	16.3	-8.7	-0.427711	1
344	Shelburne	2004.41	%	conc	thin	sawlog	retain	1	0-5	Pine	C			10	0-10	10	Top	A	F	CHN	ULT	SC, USA	SE NAM	2.38	2.38	2.17	2.17	-0.21	-0.0923733	1	Added
345	Shelburne	2004.41	%	conc	thin	sawlog	burn	1	0-5	Pine	C			10	0-10	10	Top	A	F	CHN	ULT	SC, USA	SE NAM	2.38	2.38	2.07	2.07	-0.31	-0.139552	1	Added
346	Fraterrigo	2005.18	Mg ha-1	pool	clearcut	sawlog		30	21-40	Mix	H	10.1-15	1401-1800	15	0-15	15	Top	A	F	TOC	INCEP	W. NC	SE NAM	38.7	38.7	38.8	38.8	0.1	0.00258065	1
347	Elliott and Knoepp	2005.23	Mg ha-1	pool	thin	sawlog	retain	3	0-5	Oak	H	10.1-15	1401-1800	15	0-15	15	Top	A	F		INCEP	35N83W	SE NAM	68.86	68.86	42.3	42.3	-26.56	-0.487288	1
348	Elliott and Knoepp	2005.23	Mg ha-1	pool	thin	sawlog	retain	3	0-5	Oak	H	10.1-15	1401-1800	15	0-15	15	Top	A	F		INCEP	35N83W	SE NAM	72.62	72.62	47.05	47.05	-25.57	-0.434029	1
349	Elliott and Knoepp	2005.23	Mg ha-1	pool	thin	sawlog	retain	3	0-5	Oak	H	10.1-15	1401-1800	15	0-15	15	Top	A	F		INCEP	35N83W	SE NAM	67.12	67.12	50.705	50.705	-16.415	-0.280458	1
350	Gundale	2005.25	Mg ha-1	pool	thin	sawlog	retain	3	0-5	Mix	C	5-7.5	500-750	10	O	0	O	O	O	CHN	ALF	47N113W	NW NAM	19.2	19.2	20.7	20.7	1.5	0.0752234	1
351	Gundale	2005.25	Mg ha-1	pool	thin	sawlog	burn	3	0-5	Mix	C	5-7.5	500-750	10	O	0	O	O	O	CHN	ALF	47N113W	NW NAM	19.2	19.2	14.4	14.4	-4.8	-0.287682	1
352	Gundale	2005.25	Mg ha-1	pool	thin	sawlog	retain	3	0-5	Mix	C	5-7.5	500-750	10	0-10	10	Top	A	F	CHN	ALF	47N113W	NW NAM	22.9	22.9	15.5	15.5	-7.4	-0.390297	1
353	Gundale	2005.25	Mg ha-1	pool	thin	sawlog	burn	3	0-5	Mix	C	5-7.5	500-750	10	0-10	10	Top	A	F	CHN	ALF	47N113W	NW NAM	22.9	22.9	18.5	18.5	-4.4	-0.213366	1
354	Small and McCarthy	2005.34	%	conc	clearcut	sawlog		7	6-20	Mix	H	10.1-15	1001-1400	10	0-10	10	Top	A	F	CHN	ALF	39N82W	SE NAM	2.1	2.1	2.4	2.4	0.3	0.133531	1
355	Small and McCarthy	2005.34	%	conc	clearcut	sawlog		7	6-20	Mix	H	10.1-15	1001-1400	10	0-10	10	Top	A	F	CHN	ALF	39N82W	SE NAM	2.3	2.3	2.2	2.2	-0.1	-0.0444518	1
356	Small and McCarthy	2005.34	%	conc	clearcut	sawlog		7	6-20	Mix	H	10.1-15	1001-1400	10	0-10	10	Top	A	F	CHN	ALF	39N82W	SE NAM	2.4	2.4	2.4	2.4	0	0	1
357	McGloughlin and Phillips	2006.14	Mg ha-1	pool	clearcut	sawlog		17	6-20	Mix	C	0-5	1001-1400	50	O	0	O	O	O	LOI	SPOD	46N69W	NE NAM	4.4	4.4	3.8	3.8	-0.6	-0.146603	1
358	McGloughlin and Phillips	2006.14	Mg ha-1	pool	clearcut	sawlog		17	6-20	Mix	C	0-5	1001-1400	50	0-50	50	Mid	ABC	C	LOI	SPOD	46N69W	NE NAM	18	18	19.1	19.1	1.1	0.0593166	1
359	Murphy	2006.15	Mg ha-1	pool	thin	sawlog	burn	1	0-5	Pine	C	5-7.5	751-1000	60	O	0	O	O	O	CHN	ALF	CA, USA	SW NAM	16	16	15	15	-1	-0.0645385	1
360	Murphy	2006.15	Mg ha-1	pool	thin	sawlog	retain	1	0-5	Pine	C	5-7.5	751-1000	60	O	0	O	O	O	CHN	ALF	CA, USA	SW NAM	16	16	38	38	22	0.864997	1
361	Murphy	2006.15	Mg ha-1	pool	thin	WTH	burn	1	0-5	Pine	C	5-7.5	751-1000	60	O	0	O	O	O	CHN	ALF	CA, USA	SW NAM	16	16	16	16	0	0	1
362	Murphy	2006.15	Mg ha-1	pool	thin	WTH	retain	1	0-5	Pine	C	5-7.5	751-1000	60	O	0	O	O	O	CHN	ALF	CA, USA	SW NAM	16	16	26	26	10	0.485508	1
363	Murphy	2006.15	mg g-1	conc	thin	sawlog	burn	1	0-5	Pine	C	5-7.5	751-1000	60	0-20	20	Top	A	F	CHN	ALF	CA, USA	SW NAM	35.8	35.8	41.8	41.8	6	0.154948	1
364	Murphy	2006.15	mg g-1	conc	thin	sawlog	retain	1	0-5	Pine	C	5-7.5	751-1000	60	0-20	20	Top	A	F	CHN	ALF	CA, USA	SW NAM	35.8	35.8	37.9	37.9	2.1	0.0570032	1
365	Murphy	2006.15	mg g-1	conc	thin	WTH	burn	1	0-5	Pine	C	5-7.5	751-1000	60	0-20	20	Top	A	F	CHN	ALF	CA, USA	SW NAM	35.8	35.8	40.6	40.6	4.8	0.12582	1
366	Murphy	2006.15	mg g-1	conc	thin	WTH	retain	1	0-5	Pine	C	5-7.5	751-1000	60	0-20	20	Top	A	F	CHN	ALF	CA, USA	SW NAM	35.8	35.8	38.5	38.5	2.7	0.0727103	1
367	Murphy	2006.15	mg g-1	conc	thin	sawlog	burn	1	0-5	Pine	C	5-7.5	751-1000	60	0-20	20	Top	A	F	CHN	ALF	CA, USA	SW NAM	35.8	35.8	51.9	51.9	16.1	0.371371	1
368	Murphy	2006.15	mg g-1	conc	thin	sawlog	intensive	1	0-5	Pine	C	5-7.5	751-1000	60	0-20	20	Top	A	F	CHN	ALF	CA, USA	SW NAM	35.8	35.8	32.7	32.7	-3.1	-0.0905728	1
369	Murphy	2006.15	mg g-1	conc	thin	WTH	burn	1	0-5	Pine	C	5-7.5	751-1000	60	0-20	20	Top	A	F	CHN	ALF	CA, USA	SW NAM	35.8	35.8	62.1	62.1	26.3	0.550798	1
370	Murphy	2006.15	mg g-1	conc	thin	WTH	remove	1	0-5	Pine	C	5-7.5	751-1000	60	0-20	20	Top	A	F	CHN	ALF	CA, USA	SW NAM	35.8	35.8	28.7	28.7	-7.1	-0.221051	1
371	Murphy	2006.15	mg g-1	conc	thin	sawlog	burn	1	0-5	Pine	C	5-7.5	751-1000	60	20-60	60	Deep	BC	F	CHN	ALF	CA, USA	SW NAM	19.3	19.3	26.9	26.9	7.6	0.332021	1
372	Murphy	2006.15	mg g-1	conc	thin	sawlog	retain	1	0-5	Pine	C	5-7.5	751-1000	60	20-60	60	Deep	BC	F	CHN	ALF	CA, USA	SW NAM	19.3	19.3	25.1	25.1	5.8	0.262763	1
373	Murphy	2006.15	mg g-1	conc	thin	WTH	burn	1	0-5	Pine	C	5-7.5	751-1000	60	20-60	60	Deep	BC	F	CHN	ALF	CA, USA	SW NAM	19.3	19.3	24.7	24.7	5.4	0.246698	1
374	Murphy	2006.15	mg g-1	conc	thin	WTH	retain	1	0-5	Pine	C	5-7.5	751-1000	60	20-60	60	Deep	BC	F	CHN	ALF	CA, USA	SW NAM	19.3	19.3	24.6	24.6	5.3	0.242641	1
375	Murphy	2006.15	mg g-1	conc	thin	sawlog	burn	1	0-5	Pine	C	5-7.5	751-1000	60	20-60	60	Deep	BC	F	CHN	ALF	CA, USA	SW NAM	19.3	19.3	19.5	19.5	0.2	0.0103094	1
376	Murphy	2006.15	mg g-1	conc	thin	sawlog	intensive	1	0-5	Pine	C	5-7.5	751-1000	60	20-60	60	Deep	BC	F	CHN	ALF	CA, USA	SW NAM	19.3	19.3	20.7	20.7	1.4	0.0700286	1
377	Murphy	2006.15	mg g-1	conc	thin	WTH	burn	1	0-5	Pine	C	5-7.5	751-1000	60	20-60	60	Deep	BC	F	CHN	ALF	CA, USA	SW NAM	19.3	19.3	42.6	42.6	23.3	0.791749	1
378	Murphy	2006.15	mg g-1	conc	thin	WTH	remove	1	0-5	Pine	C	5-7.5	751-1000	60	20-60	60	Deep	BC	F	CHN	ALF	CA, USA	SW NAM	19.3	19.3	19.3	19.3	0	0	1
379	Boerner	2006.26	g kg-1	conc	thin	sawlog		1	0-5	Loblolly Pine	C			10	0-10	10	Top	A	F	CHN	ULT	S. Carolina	SE NAM	25.4	25.4	19.4	19.4	-6	-0.269476	1
380	Boerner	2006.26	g kg-1	conc	thin	sawlog	burn	1	0-5	Loblolly Pine	C			10	0-10	10	Top	A	F	CHN	ULT	S. Carolina	SE NAM	25.4	25.4	18.9	18.9	-6.5	-0.295587	1
381	Boerner	2006.26	g kg-1	conc	thin	sawlog		4	0-5	Loblolly Pine	C			10	0-10	10	Top	A	F	CHN	ULT	S. Carolina	SE NAM	20.1	20.1	12.1	12.1	-8	-0.507514	1
382	Boerner	2006.26	g kg-1	conc	thin	sawlog	burn	3	0-5	Loblolly Pine	C			10	0-10	10	Top	A	F	CHN	ULT	S. Carolina	SE NAM	20.1	20.1	14.1	14.1	-6	-0.354545	1
383	Hart	2006.27	g m-2	pool	thin	WTH	burn	1	0-5	Ponderosa Pine	C		500-750	15	O	0	O	O	O	CHN	ALF	35N112W	SW NAM	3440	34.4	662	6.62	-27.78	-1.64796	1
384	Hart	2006.27	g m-2	pool	thin	WTH	burn	1	0-5	Ponderosa Pine	C		500-750	15	0-15	15	Top	A	F	CHN	ALF	35N112W	SW NAM	2540	25.4	2960	29.6	4.2	0.153025	1
385	Skovsgaard	2006.28	Mg ha-1	pool	thin			0	0-5	Spruce	C	7.6-10	751-1000	30	O	0	O	O	O	CHN	ALF	Denmark	EUR	17	17	15	15	-2	-0.125163	1
386	Skovsgaard	2006.28	Mg ha-1	pool	thin			0	0-5	Spruce	C	7.6-10	751-1000	30	O	0	O	O	O	CHN	ALF	Denmark	EUR	17	17	14	14	-3	-0.194156	1
387	Skovsgaard	2006.28	Mg ha-1	pool	thin			0	0-5	Spruce	C	7.6-10	751-1000	30	O	0	O	O	O	CHN	ALF	Denmark	EUR	17	17	11	11	-6	-0.435318	1
388	Skovsgaard	2006.28	Mg ha-1	pool	thin			0	0-5	Spruce	C	7.6-10	751-1000	30	0-5	5	Top	A	F	CHN	ALF	Denmark	EUR	21.7	21.7	20.9	20.9	-0.8	-0.0375631	1
389	Skovsgaard	2006.28	Mg ha-1	pool	thin			0	0-5	Spruce	C	7.6-10	751-1000	30	0-5	5	Top	A	F	CHN	ALF	Denmark	EUR	21.7	21.7	20.9	20.9	-0.8	-0.0375631	1
390	Skovsgaard	2006.28	Mg ha-1	pool	thin			0	0-5	Spruce	C	7.6-10	751-1000	30	0-5	5	Top	A	F	CHN	ALF	Denmark	EUR	21.7	21.7	22.1	22.1	0.4	0.0182653	1
391	Skovsgaard	2006.28	Mg ha-1	pool	thin			0	0-5	Spruce	C	7.6-10	751-1000	30	5-15	15	Top	A	F	CHN	ALF	Denmark	EUR	22.9	22.9	24.7	24.7	1.8	0.0756663	1
392	Skovsgaard	2006.28	Mg ha-1	pool	thin			0	0-5	Spruce	C	7.6-10	751-1000	30	5-15	15	Top	A	F	CHN	ALF	Denmark	EUR	22.9	22.9	25.9	25.9	3	0.123106	1
393	Skovsgaard	2006.28	Mg ha-1	pool	thin			0	0-5	Spruce	C	7.6-10	751-1000	30	5-15	15	Top	A	F	CHN	ALF	Denmark	EUR	22.9	22.9	26.8	26.8	3.9	0.157265	1
394	Skovsgaard	2006.28	Mg ha-1	pool	thin			0	0-5	Spruce	C	7.6-10	751-1000	30	15-30	30	Mid	BC	F	CHN	ALF	Denmark	EUR	26.1	26.1	30.6	30.6	4.5	0.159065	1
395	Skovsgaard	2006.28	Mg ha-1	pool	thin			0	0-5	Spruce	C	7.6-10	751-1000	30	15-30	30	Mid	BC	F	CHN	ALF	Denmark	EUR	26.1	26.1	27.9	27.9	1.8	0.0666914	1
396	Skovsgaard	2006.28	Mg ha-1	pool	thin			0	0-5	Spruce	C	7.6-10	751-1000	30	15-30	30	Mid	BC	F	CHN	ALF	Denmark	EUR	26.1	26.1	29.8	29.8	3.7	0.132573	1
397	Grady and Hart	2006.7	Mg ha-1	pool	thin	sawlog	retain	12	6-20	Ponderosa Pine	C	5-7.5	500-750	15	0-15	15	Top	A		CHN	MOLL	AZ, USA	SW NAM	30	30	35	35	5	0.154151	1
398	Grady and Hart	2006.7	Mg ha-1	pool	thin	sawlog	burn	12	6-20	Ponderosa Pine	C	5-7.5	500-750	15	0-15	15	Top	A		CHN	MOLL	AZ, USA	SW NAM	30	30	35.4	35.4	5.4	0.165514	1
399	Hwang and Son	2006.8	Mg ha-1	pool	thin	sawlog		2	0-5	Mix	C	10.1-15	1001-1400	30	0-30	30	Mid	ABC		LOI		37N127E	ASIA	61.3	61.3	68.8	68.8	7.5	0.115424	1
400	Hwang and Son	2006.8	Mg ha-1	pool	thin	sawlog		2	0-5	Mix	C	10.1-15	1001-1400	30	0-30	30	Mid	ABC		LOI		37N127E	ASIA	87.5	87.5	92.1	92.1	4.6	0.0512361	1
401	Sanchez	2007.12	Mg ha-1	pool	clearcut	WTH	intensive	1	0-5	Mix	C	16-20	1001-1400	105	0-15	15	Top	A	F	CHN	ULT	33N82W	SE NAM	22.2	22.2	21.4	21.4	-0.8	-0.0367014	1
402	Sanchez	2007.12	Mg ha-1	pool	clearcut	WTH	intensive	3	0-5	Mix	C	16-20	1001-1400	105	0-15	15	Top	A	F	CHN	ULT	33N82W	SE NAM	22.2	22.2	15.6	15.6	-6.6	-0.352821	1
403	Sanchez	2007.12	Mg ha-1	pool	clearcut	WTH	intensive	1	0-5	Mix	C	16-20	1001-1400	105	15-45	45	Mid	BC	F	CHN	ULT	33N82W	SE NAM	13	13	31.5	31.5	18.5	0.885038	1	Added
404	Sanchez	2007.12	Mg ha-1	pool	clearcut	WTH	intensive	3	0-5	Mix	C	16-20	1001-1400	105	15-45	45	Mid	BC	F	CHN	ULT	33N82W	SE NAM	13	13	20.3	20.3	7.3	0.445672	1	Added
405	Sanchez	2007.12	Mg ha-1	pool	clearcut	WTH	intensive	1	0-5	Mix	C	16-20	1001-1400	105	45-105	105	V_Deep	BC	F	CHN	ULT	33N82W	SE NAM	10.5	10.5	11.2	11.2	0.7	0.0645385	1
406	Sanchez	2007.12	Mg ha-1	pool	clearcut	WTH	intensive	3	0-5	Mix	C	16-20	1001-1400	105	45-105	105	V_Deep	BC	F	CHN	ULT	33N82W	SE NAM	10.5	10.5	12.7	12.7	2.2	0.190227	1
407	Ussiri and Johnson	2007.16	g kg-1	conc	clearcut	WTH		2	0-5	Mix	H			60	O	0	O	O	O	CHN	SPOD	46N72W	NE NAM	309	309	194	194	-115	-0.465483	1
408	Ussiri and Johnson	2007.16	g kg-1	conc	clearcut	WTH		7	6-20	Mix	H			60	O	0	O	O	O	CHN	SPOD	46N72W	NE NAM	309	309	283	283	-26	-0.0878944	1
409	Ussiri and Johnson	2007.16	g kg-1	conc	clearcut	WTH		14	6-20	Mix	H			60	O	0	O	O	O	CHN	SPOD	46N72W	NE NAM	309	309	331	331	22	0.0687771	1
410	Ussiri and Johnson	2007.16	g kg-1	conc	clearcut	WTH		2	0-5	Mix	H			60	Bs2		Deep	BC	C	CHN	SPOD	46N72W	NE NAM	32	32	33	33	1	0.0307717	1
411	Ussiri and Johnson	2007.16	g kg-1	conc	clearcut	WTH		7	6-20	Mix	H			60	Bs2		Deep	BC	C	CHN	SPOD	46N72W	NE NAM	32	32	44	44	12	0.318454	1
412	Ussiri and Johnson	2007.16	g kg-1	conc	clearcut	WTH		14	6-20	Mix	H			60	Bs2		Deep	BC	C	CHN	SPOD	46N72W	NE NAM	32	32	48	48	16	0.405465	1
413	Ussiri and Johnson	2007.16	g kg-1	conc	clearcut	WTH		2	0-5	Mix	H			60	Bh		Mid	BC	C	CHN	SPOD	46N72W	NE NAM	65	65	74	74	9	0.129678	1
414	Ussiri and Johnson	2007.16	g kg-1	conc	clearcut	WTH		7	6-20	Mix	H			60	Bh		Mid	BC	C	CHN	SPOD	46N72W	NE NAM	65	65	90	90	25	0.325422	1
415	Ussiri and Johnson	2007.16	g kg-1	conc	clearcut	WTH		14	6-20	Mix	H			60	Bh		Mid	BC	C	CHN	SPOD	46N72W	NE NAM	65	65	125	125	60	0.653926	1
416	Ussiri and Johnson	2007.16	g kg-1	conc	clearcut	WTH		2	0-5	Mix	H			60	Bs1		Mid	BC	C	CHN	SPOD	46N72W	NE NAM	62	62	50	50	-12	-0.215111	1
417	Ussiri and Johnson	2007.16	g kg-1	conc	clearcut	WTH		7	6-20	Mix	H			60	Bs1		Mid	BC	C	CHN	SPOD	46N72W	NE NAM	62	62	72	72	10	0.149532	1
418	Ussiri and Johnson	2007.16	g kg-1	conc	clearcut	WTH		14	6-20	Mix	H			60	Bs1		Mid	BC	C	CHN	SPOD	46N72W	NE NAM	62	62	77	77	15	0.216671	1
419	Ussiri and Johnson	2007.16	g kg-1	conc	clearcut	WTH		2	0-5	Mix	H			60	E		Top	A	C	CHN	SPOD	46N72W	NE NAM	22	22	15	15	-7	-0.382992	1
420	Ussiri and Johnson	2007.16	g kg-1	conc	clearcut	WTH		7	6-20	Mix	H			60	E		Top	A	C	CHN	SPOD	46N72W	NE NAM	22	22	20	20	-2	-0.0953102	1
421	Ussiri and Johnson	2007.16	g kg-1	conc	clearcut	WTH		14	6-20	Mix	H			60	E		Top	A	C	CHN	SPOD	46N72W	NE NAM	22	22	19	19	-3	-0.146603	1
422	Gough	2007.6	Mg ha-1	pool	clearcut	sawlog	burn	6	6-20	Aspen	H	5-7.5	751-1000	80	0-20	20	Top	A	C	CHN	SPOD	46N85W	NE NAM	6.4	6.4	11.9	11.9	5.5	0.62024	1
423	Gough	2007.6	Mg ha-1	pool	clearcut	sawlog	burn	24	21-40	Aspen	H	5-7.5	751-1000	80	0-20	20	Top	A	C	CHN	SPOD	46N85W	NE NAM	6.4	6.4	6.6	6.6	0.2	0.0307717	1
424	Gough	2007.6	Mg ha-1	pool	clearcut	sawlog	burn	50	>40	Aspen	H	5-7.5	751-1000	80	0-20	20	Top	A	C	CHN	SPOD	46N85W	NE NAM	6.4	6.4	5.3	5.3	-1.1	-0.188591	1
425	Gough	2007.6	Mg ha-1	pool	clearcut	sawlog	burn	56	>40	Aspen	H	5-7.5	751-1000	80	0-20	20	Top	A	C	CHN	SPOD	46N85W	NE NAM	6.4	6.4	6.3	6.3	-0.1	-0.0157484	1
426	Gough	2007.6	Mg ha-1	pool	clearcut	sawlog	burn	68	>40	Aspen	H	5-7.5	751-1000	80	0-20	20	Top	A	C	CHN	SPOD	46N85W	NE NAM	6.4	6.4	8.7	8.7	2.3	0.307025	1
427	Gough	2007.6	Mg ha-1	pool	clearcut	sawlog	burn	6	6-20	Aspen	H	5-7.5	751-1000	80	20-40	40	Mid	BC	C	CHN	SPOD	46N85W	NE NAM	11.5	11.5	11.8	11.8	0.3	0.0257525	1
428	Gough	2007.6	Mg ha-1	pool	clearcut	sawlog	burn	24	21-40	Aspen	H	5-7.5	751-1000	80	20-40	40	Mid	BC	C	CHN	SPOD	46N85W	NE NAM	11.5	11.5	11.4	11.4	-0.1	-0.00873368	1
429	Gough	2007.6	Mg ha-1	pool	clearcut	sawlog	burn	50	>40	Aspen	H	5-7.5	751-1000	80	20-40	40	Mid	BC	C	CHN	SPOD	46N85W	NE NAM	11.5	11.5	8.8	8.8	-2.7	-0.267595	1
430	Gough	2007.6	Mg ha-1	pool	clearcut	sawlog	burn	56	>40	Aspen	H	5-7.5	751-1000	80	20-40	40	Mid	BC	C	CHN	SPOD	46N85W	NE NAM	11.5	11.5	11.7	11.7	0.2	0.0172418	1
431	Gough	2007.6	Mg ha-1	pool	clearcut	sawlog	burn	68	>40	Aspen	H	5-7.5	751-1000	80	20-40	40	Mid	BC	C	CHN	SPOD	46N85W	NE NAM	11.5	11.5	12.3	12.3	0.8	0.0672522	1
432	Gough	2007.6	Mg ha-1	pool	clearcut	sawlog	burn	6	6-20	Aspen	H	5-7.5	751-1000	80	40-80	80	Deep	BC	C	CHN	SPOD	46N85W	NE NAM	13.2	13.2	11	11	-2.2	-0.182322	1
433	Gough	2007.6	Mg ha-1	pool	clearcut	sawlog	burn	24	21-40	Aspen	H	5-7.5	751-1000	80	40-80	80	Deep	BC	C	CHN	SPOD	46N85W	NE NAM	13.2	13.2	15.6	15.6	2.4	0.167054	1
434	Gough	2007.6	Mg ha-1	pool	clearcut	sawlog	burn	50	>40	Aspen	H	5-7.5	751-1000	80	40-80	80	Deep	BC	C	CHN	SPOD	46N85W	NE NAM	13.2	13.2	11.5	11.5	-1.7	-0.13787	1
435	Gough	2007.6	Mg ha-1	pool	clearcut	sawlog	burn	56	>40	Aspen	H	5-7.5	751-1000	80	40-80	80	Deep	BC	C	CHN	SPOD	46N85W	NE NAM	13.2	13.2	17.5	17.5	4.3	0.281984	1
436	Gough	2007.6	Mg ha-1	pool	clearcut	sawlog	burn	68	>40	Aspen	H	5-7.5	751-1000	80	40-80	80	Deep	BC	C	CHN	SPOD	46N85W	NE NAM	13.2	13.2	11.2	11.2	-2	-0.164303	1
437	Leduc and Rothstein	2007.9	mg g-1	conc	clearcut	WTH		5	0-5	Jack Pine	C	5-7.5	500-750	10	O + 0-10	10	O	O+M	O	CHN	ENT	44N84W	NE NAM	27.5	27.5	26.5	26.5	-1	-0.0370413	1
438	Zabowski	2008.1	mg g-1	conc	clearcut			25	21-40	Douglas fir	C	7.6-10	>1800	20	0-20	20	Top	A	C	CHN		WA/OR, USA	NW NAM	72.78	72.78	61.9	61.9	-10.88	-0.161921	1	Age average of 5 sites; soils varied by site
439	Zabowski	2008.1	mg g-1	conc	clearcut		intensive	25	21-40	Douglas fir	C	7.6-10	>1800	20	0-20	20	Top	A	C	CHN		WA/OR, USA	NW NAM	72.78	72.78	45.69	45.69	-27.09	-0.465562	1	Age average of 5 sites; soils varied by site
440	Esquilin	2008.3	g kg-1	conc	thin	sawlog	intensive	14	6-20	Ponderosa Pine	C	0-5	<500	10	0-10	10	Top	A	C	W-B	ALF	39N105W	SW NAM	44	44	24	24	-20	-0.606136	1
441	Selig	2008.5	%	conc	thin	sawlog	remove	14	6-20	Loblolly Pine	C	10.1-15	1001-1400	30	0-10	10	Top	A	F	CHN	ULT	VA, USA	SE NAM	1.66	1.66	1.86	1.86	0.2	0.113759	1
442	Selig	2008.5	%	conc	thin	sawlog	remove	14	6-20	Loblolly Pine	C	10.1-15	1001-1400	30	10-20	20	Top	A	F	CHN	ULT	VA, USA	SE NAM	0.76	0.76	1.04	1.04	0.28	0.313658	1
443	Selig	2008.5	%	conc	thin	sawlog	remove	14	6-20	Loblolly Pine	C	10.1-15	1001-1400	30	20-30	30	Mid	BC	F	CHN	ULT	VA, USA	SE NAM	0.45	0.45	0.59	0.59	0.14	0.270875	1
444	Diochon	2009.1	Mg ha-1	pool	clearcut	sawlog	retain	1	0-5	Red Spruce	C	5-7.5	1001-1400	50	O	0	O	O	F	CHN	SPOD	Nova Scotia	NE NAM	37.87	37.87	11.98	11.98	-25.89	-1.15092	1
445	Diochon	2009.1	Mg ha-1	pool	clearcut	sawlog	retain	15	6-20	Red Spruce	C	5-7.5	1001-1400	50	O	0	O	O	F	CHN	SPOD	Nova Scotia	NE NAM	37.87	37.87	12.07	12.07	-25.8	-1.14344	1
446	Diochon	2009.1	Mg ha-1	pool	clearcut	sawlog	retain	45	>40	Red Spruce	C	5-7.5	1001-1400	50	O	0	O	O	F	CHN	SPOD	Nova Scotia	NE NAM	37.87	37.87	10.37	10.37	-27.5	-1.29524	1
447	Diochon	2009.1	Mg ha-1	pool	clearcut	sawlog	retain	80	>40	Red Spruce	C	5-7.5	1001-1400	50	O	0	O	O	F	CHN	SPOD	Nova Scotia	NE NAM	37.87	37.87	28.87	28.87	-9	-0.271356	1
448	Diochon	2009.1	Mg ha-1	pool	clearcut	sawlog	retain	1	0-5	Red Spruce	C	5-7.5	1001-1400	50	0-5	5	Top	A	F	CHN	SPOD	Nova Scotia	NE NAM	26.34	26.34	28.91	28.91	2.57	0.0930989	1
449	Diochon	2009.1	Mg ha-1	pool	clearcut	sawlog	retain	15	6-20	Red Spruce	C	5-7.5	1001-1400	50	0-5	5	Top	A	F	CHN	SPOD	Nova Scotia	NE NAM	26.34	26.34	12.47	12.47	-13.87	-0.747763	1
450	Diochon	2009.1	Mg ha-1	pool	clearcut	sawlog	retain	45	>40	Red Spruce	C	5-7.5	1001-1400	50	0-5	5	Top	A	F	CHN	SPOD	Nova Scotia	NE NAM	26.34	26.34	11.69	11.69	-14.65	-0.812355	1
451	Diochon	2009.1	Mg ha-1	pool	clearcut	sawlog	retain	80	>40	Red Spruce	C	5-7.5	1001-1400	50	0-5	5	Top	A	F	CHN	SPOD	Nova Scotia	NE NAM	26.34	26.34	8.32	8.32	-18.02	-1.15243	1
452	Diochon	2009.1	Mg ha-1	pool	clearcut	sawlog	retain	1	0-5	Red Spruce	C	5-7.5	1001-1400	50	5-10	10	Top	BC	F	CHN	SPOD	Nova Scotia	NE NAM	7.92	7.92	7.73	7.73	-0.19	-0.0242823	1
453	Diochon	2009.1	Mg ha-1	pool	clearcut	sawlog	retain	15	6-20	Red Spruce	C	5-7.5	1001-1400	50	5-10	10	Top	BC	F	CHN	SPOD	Nova Scotia	NE NAM	7.92	7.92	7.33	7.33	-0.59	-0.0774157	1
454	Diochon	2009.1	Mg ha-1	pool	clearcut	sawlog	retain	45	>40	Red Spruce	C	5-7.5	1001-1400	50	5-10	10	Top	BC	F	CHN	SPOD	Nova Scotia	NE NAM	7.92	7.92	8.51	8.51	0.59	0.0718507	1
455	Diochon	2009.1	Mg ha-1	pool	clearcut	sawlog	retain	80	>40	Red Spruce	C	5-7.5	1001-1400	50	5-10	10	Top	BC	F	CHN	SPOD	Nova Scotia	NE NAM	7.92	7.92	11.09	11.09	3.17	0.336653	1
456	Diochon	2009.1	Mg ha-1	pool	clearcut	sawlog	retain	1	0-5	Red Spruce	C	5-7.5	1001-1400	50	10-15	15	Top	BC	F	CHN	SPOD	Nova Scotia	NE NAM	12.48	12.48	7.52	7.52	-4.96	-0.506561	1
457	Diochon	2009.1	Mg ha-1	pool	clearcut	sawlog	retain	15	6-20	Red Spruce	C	5-7.5	1001-1400	50	10-15	15	Top	BC	F	CHN	SPOD	Nova Scotia	NE NAM	12.48	12.48	9.7	9.7	-2.78	-0.252001	1
458	Diochon	2009.1	Mg ha-1	pool	clearcut	sawlog	retain	45	>40	Red Spruce	C	5-7.5	1001-1400	50	10-15	15	Top	BC	F	CHN	SPOD	Nova Scotia	NE NAM	12.48	12.48	7.13	7.13	-5.35	-0.559816	1
459	Diochon	2009.1	Mg ha-1	pool	clearcut	sawlog	retain	80	>40	Red Spruce	C	5-7.5	1001-1400	50	10-15	15	Top	BC	F	CHN	SPOD	Nova Scotia	NE NAM	12.48	12.48	15.84	15.84	3.36	0.238411	1
460	Diochon	2009.1	Mg ha-1	pool	clearcut	sawlog	retain	1	0-5	Red Spruce	C	5-7.5	1001-1400	50	15-20	20	Mid	BC	F	CHN	SPOD	Nova Scotia	NE NAM	12.47	12.47	2.38	2.38	-10.09	-1.65623	1
461	Diochon	2009.1	Mg ha-1	pool	clearcut	sawlog	retain	15	6-20	Red Spruce	C	5-7.5	1001-1400	50	15-20	20	Mid	BC	F	CHN	SPOD	Nova Scotia	NE NAM	12.47	12.47	5.55	5.55	-6.92	-0.809528	1
462	Diochon	2009.1	Mg ha-1	pool	clearcut	sawlog	retain	45	>40	Red Spruce	C	5-7.5	1001-1400	50	15-20	20	Mid	BC	F	CHN	SPOD	Nova Scotia	NE NAM	12.47	12.47	9.5	9.5	-2.97	-0.272034	1
463	Diochon	2009.1	Mg ha-1	pool	clearcut	sawlog	retain	80	>40	Red Spruce	C	5-7.5	1001-1400	50	15-20	20	Mid	BC	F	CHN	SPOD	Nova Scotia	NE NAM	12.47	12.47	9.31	9.31	-3.16	-0.292237	1
464	Diochon	2009.1	Mg ha-1	pool	clearcut	sawlog	retain	1	0-5	Red Spruce	C	5-7.5	1001-1400	50	20-35	35	Mid	BC	F	CHN	SPOD	Nova Scotia	NE NAM	36.63	36.63	20.79	20.79	-15.84	-0.566395	1
465	Diochon	2009.1	Mg ha-1	pool	clearcut	sawlog	retain	15	6-20	Red Spruce	C	5-7.5	1001-1400	50	20-35	35	Mid	BC	F	CHN	SPOD	Nova Scotia	NE NAM	36.63	36.63	17.42	17.42	-19.21	-0.743249	1
466	Diochon	2009.1	Mg ha-1	pool	clearcut	sawlog	retain	45	>40	Red Spruce	C	5-7.5	1001-1400	50	20-35	35	Mid	BC	F	CHN	SPOD	Nova Scotia	NE NAM	36.63	36.63	12.87	12.87	-23.76	-1.04597	1
467	Diochon	2009.1	Mg ha-1	pool	clearcut	sawlog	retain	80	>40	Red Spruce	C	5-7.5	1001-1400	50	20-35	35	Mid	BC	F	CHN	SPOD	Nova Scotia	NE NAM	36.63	36.63	24.75	24.75	-11.88	-0.392042	1
468	Diochon	2009.1	Mg ha-1	pool	clearcut	sawlog	retain	1	0-5	Red Spruce	C	5-7.5	1001-1400	50	35-50	50	Deep	BC	F	CHN	SPOD	Nova Scotia	NE NAM	28.32	28.32	35.05	35.05	6.73	0.213207	1
469	Diochon	2009.1	Mg ha-1	pool	clearcut	sawlog	retain	15	6-20	Red Spruce	C	5-7.5	1001-1400	50	35-50	50	Deep	BC	F	CHN	SPOD	Nova Scotia	NE NAM	28.32	28.32	16.84	16.84	-11.48	-0.519811	1
470	Diochon	2009.1	Mg ha-1	pool	clearcut	sawlog	retain	45	>40	Red Spruce	C	5-7.5	1001-1400	50	35-50	50	Deep	BC	F	CHN	SPOD	Nova Scotia	NE NAM	28.32	28.32	18.02	18.02	-10.3	-0.452086	1
471	Diochon	2009.1	Mg ha-1	pool	clearcut	sawlog	retain	80	>40	Red Spruce	C	5-7.5	1001-1400	50	35-50	50	Deep	BC	F	CHN	SPOD	Nova Scotia	NE NAM	28.32	28.32	29.9	29.9	1.58	0.0542902	1
472	Xiang	2009.2	t ha-1	pool	clearcut	sawlog	retain	0.33	0-5	Fir	C	16-20	1401-1800	30	0-15	15	Top	A	F	W-B	ULT	China	ASIA	21.7	21.7	32	32	10.3	0.388424	1
473	Xiang	2009.2	t ha-1	pool	clearcut	sawlog	retain	0.42	0-5	Fir	C	16-20	1401-1800	30	0-15	15	Top	A	F	W-B	ULT	China	ASIA	21.7	21.7	35.1	35.1	13.4	0.480889	1
474	Xiang	2009.2	t ha-1	pool	clearcut	sawlog	burn	0.43	0-5	Fir	C	16-20	1401-1800	30	0-15	15	Top	A	F	W-B	ULT	China	ASIA	21.7	21.7	16.1	16.1	-5.6	-0.298493	1
475	Xiang	2009.2	t ha-1	pool	clearcut	sawlog	burn	0.67	0-5	Fir	C	16-20	1401-1800	30	0-15	15	Top	A	F	W-B	ULT	China	ASIA	21.7	21.7	24.7	24.7	3	0.129491	1
476	Xiang	2009.2	t ha-1	pool	clearcut	sawlog	retain	0.33	0-5	Fir	C	16-20	1401-1800	30	15-30	30	Mid	BC	F	W-B	ULT	China	ASIA	16	16	13.5	13.5	-2.5	-0.169899	1
477	Xiang	2009.2	t ha-1	pool	clearcut	sawlog	retain	0.42	0-5	Fir	C	16-20	1401-1800	30	15-30	30	Mid	BC	F	W-B	ULT	China	ASIA	16	16	23.1	23.1	7.1	0.367244	1
478	Xiang	2009.2	t ha-1	pool	clearcut	sawlog	burn	0.43	0-5	Fir	C	16-20	1401-1800	30	15-30	30	Mid	BC	F	W-B	ULT	China	ASIA	16	16	15	15	-1	-0.0645385	1
479	Xiang	2009.2	t ha-1	pool	clearcut	sawlog	burn	0.67	0-5	Fir	C	16-20	1401-1800	30	15-30	30	Mid	BC	F	W-B	ULT	China	ASIA	16	16	15.7	15.7	-0.3	-0.018928	1
480	Chatterjee	2009.3	Mg ha-1	pool	clearcut			16	6-20	Ponderosa Pine	C			60	O	0	O	O	F	CHN	ALF	WY, USA	NW NAM	17.2	17.2	18.6	18.6	1.4	0.0782522	1	Even-age stand, clearcut in 1960, followed by regeneration, commercial harvesting in 1990, thinning in 1995
481	Chatterjee	2009.3	Mg ha-1	pool	clearcut			14	6-20	Ponderosa Pine	C			60	O	0	O	O	F	CHN	ALF	WY, USA	NW NAM	17.2	17.2	21.8	21.8	4.6	0.237001	1	Uneven-age stand, selectively harvested in 1979 and 1992, thinning in 1995
482	Chatterjee	2009.3	Mg ha-1	pool	clearcut			13	6-20	Ponderosa Pine	C			60	O	0	O	O	F	CHN	ALF	WY, USA	NW NAM	17.2	17.2	24.4	24.4	7.2	0.349674	1	Intensively harvested stand, selectively harvested in 1985, 1989, and 1993
483	Chatterjee	2009.3	Mg ha-1	pool	clearcut			45	>40	Lodgepole Pine	C		500-750	30	O	0	O	O	F	CHN	ALF	WY, USA	NW NAM	32.1	32.1	23.7	23.7	-8.4	-0.303381	1	Even-age stand
484	Chatterjee	2009.3	Mg ha-1	pool	clearcut			16	6-20	Ponderosa Pine	C			60	0-5	5	Top	A	F	CHN	ALF	WY, USA	NW NAM	18.2	18.2	20.9	20.9	2.7	0.138328	1	Even-age stand
485	Chatterjee	2009.3	Mg ha-1	pool	clearcut			14	6-20	Ponderosa Pine	C			60	0-5	5	Top	A	F	CHN	ALF	WY, USA	NW NAM	18.2	18.2	23.1	23.1	4.9	0.238411	1	Uneven-age stand
486	Chatterjee	2009.3	Mg ha-1	pool	clearcut			13	6-20	Ponderosa Pine	C			60	0-5	5	Top	A	F	CHN	ALF	WY, USA	NW NAM	18.2	18.2	21.4	21.4	3.2	0.161969	1	Intensively harvested stand
487	Chatterjee	2009.3	Mg ha-1	pool	clearcut			45	>40	Lodgepole Pine	C		500-750	30	0-5	5	Top	A	F	CHN	ALF	WY, USA	NW NAM	18.3	18.3	22.2	22.2	3.9	0.193191	1	Even-age stand
488	Chatterjee	2009.3	Mg ha-1	pool	clearcut			16	6-20	Ponderosa Pine	C			60	5-15	15	Top	A	F	CHN	ALF	WY, USA	NW NAM	20.2	20.2	19.9	19.9	-0.3	-0.0149629	1	Even-age stand
489	Chatterjee	2009.3	Mg ha-1	pool	clearcut			14	6-20	Ponderosa Pine	C			60	5-15	15	Top	A	F	CHN	ALF	WY, USA	NW NAM	20.2	20.2	24.7	24.7	4.5	0.201121	1	Uneven-age stand
490	Chatterjee	2009.3	Mg ha-1	pool	clearcut			13	6-20	Ponderosa Pine	C			60	5-15	15	Top	A	F	CHN	ALF	WY, USA	NW NAM	20.2	20.2	26.1	26.1	5.9	0.256253	1	Intensively harvested stand
491	Chatterjee	2009.3	Mg ha-1	pool	clearcut			45	>40	Lodgepole Pine	C		500-750	30	5-15	15	Top	A	F	CHN	ALF	WY, USA	NW NAM	16.3	16.3	14.8	14.8	-1.5	-0.0965379	1	Even-age stand
492	Chatterjee	2009.3	Mg ha-1	pool	clearcut			16	6-20	Ponderosa Pine	C			60	15-30	30	Mid	BC	F	CHN	ALF	WY, USA	NW NAM	20.9	20.9	19.4	19.4	-1.5	-0.0744761	1	Even-age stand
493	Chatterjee	2009.3	Mg ha-1	pool	clearcut			14	6-20	Ponderosa Pine	C			60	15-30	30	Mid	BC	F	CHN	ALF	WY, USA	NW NAM	20.9	20.9	23.3	23.3	2.4	0.108704	1	Uneven-age stand
494	Chatterjee	2009.3	Mg ha-1	pool	clearcut			13	6-20	Ponderosa Pine	C			60	15-30	30	Mid	BC	F	CHN	ALF	WY, USA	NW NAM	20.9	20.9	21.7	21.7	0.8	0.0375631	1	Intensively harvested stand
495	Chatterjee	2009.3	Mg ha-1	pool	clearcut			45	>40	Lodgepole Pine	C		500-750	30	15-30	30	Mid	BC	F	CHN	ALF	WY, USA	NW NAM	10.8	10.8	6.9	6.9	-3.9	-0.448025	1	Even-age stand
496	Chatterjee	2009.3	Mg ha-1	pool	clearcut			16	6-20	Ponderosa Pine	C			60	30-60	60	Deep	BC	F	CHN	ALF	WY, USA	NW NAM	26.6	26.6	29	29	2.4	0.0863846	1	Even-age stand
497	Chatterjee	2009.3	Mg ha-1	pool	clearcut			14	6-20	Ponderosa Pine	C			60	30-60	60	Deep	BC	F	CHN	ALF	WY, USA	NW NAM	26.6	26.6	33.2	33.2	6.6	0.221639	1	Uneven-age stand
498	Chatterjee	2009.3	Mg ha-1	pool	clearcut			13	6-20	Ponderosa Pine	C			60	30-60	60	Deep	BC	F	CHN	ALF	WY, USA	NW NAM	26.6	26.6	33.6	33.6	7	0.233615	1	Intensively harvested stand
499	Norris	2009.4	kg m-2	pool	clearcut	WTH	intensive	4	0-5	Jack Pine	C	0-5	<500	100	O	0	O	O	C	CHN	INCEP	Saskatchewan, Canada	NE NAM	1.02	10.2	0.03	0.3	-9.9	-3.52636	1
500	Norris	2009.4	kg m-2	pool	clearcut	WTH	intensive	12	6-20	Jack Pine	C	0-5	<500	100	O	0	O	O	C	CHN	INCEP	Saskatchewan, Canada	NE NAM	1.02	10.2	0.575	5.75	-4.45	-0.573188	1
501	Norris	2009.4	kg m-2	pool	clearcut	WTH	intensive	31	21-40	Jack Pine	C	0-5	<500	100	O	0	O	O	C	CHN	INCEP	Saskatchewan, Canada	NE NAM	1.02	10.2	0.356	3.56	-6.64	-1.05263	1
502	Norris	2009.4	kg m-2	pool	clearcut	WTH	intensive	4	0-5	Jack Pine	C	0-5	<500	100	0-8 (avg)	8	Top	A	C	CHN	INCEP	Saskatchewan, Canada	NE NAM	1.039	10.39	1.316	13.16	2.77	0.236338	1
503	Norris	2009.4	kg m-2	pool	clearcut	WTH	intensive	12	6-20	Jack Pine	C	0-5	<500	100	0-8 (avg)	8	Top	A	C	CHN	INCEP	Saskatchewan, Canada	NE NAM	1.039	10.39	0.892	8.92	-1.47	-0.152548	1
504	Norris	2009.4	kg m-2	pool	clearcut	WTH	intensive	31	21-40	Jack Pine	C	0-5	<500	100	0-8 (avg)	8	Top	A	C	CHN	INCEP	Saskatchewan, Canada	NE NAM	1.039	10.39	2.123	21.23	10.84	0.714571	1
505	Norris	2009.4	kg m-2	pool	clearcut	WTH	intensive	4	0-5	Jack Pine	C	0-5	<500	100	8-19 (avg)	19	Top	BC	C	CHN	INCEP	Saskatchewan, Canada	NE NAM	0.471	4.71	0.571	5.71	1	0.192531	1
506	Norris	2009.4	kg m-2	pool	clearcut	WTH	intensive	12	6-20	Jack Pine	C	0-5	<500	100	8-19 (avg)	19	Top	BC	C	CHN	INCEP	Saskatchewan, Canada	NE NAM	0.471	4.71	0.511	5.11	0.4	0.0815115	1
507	Norris	2009.4	kg m-2	pool	clearcut	WTH	intensive	31	21-40	Jack Pine	C	0-5	<500	100	8-19 (avg)	19	Top	BC	C	CHN	INCEP	Saskatchewan, Canada	NE NAM	0.471	4.71	0.777	7.77	3.06	0.500582	1
508	Norris	2009.4	kg m-2	pool	clearcut	WTH	intensive	4	0-5	Jack Pine	C	0-5	<500	100	19-42 (avg)	42	Mid	BC	C	CHN	INCEP	Saskatchewan, Canada	NE NAM	0.201	2.01	0.374	3.74	1.73	0.620951	1
509	Norris	2009.4	kg m-2	pool	clearcut	WTH	intensive	12	6-20	Jack Pine	C	0-5	<500	100	19-42 (avg)	42	Mid	BC	C	CHN	INCEP	Saskatchewan, Canada	NE NAM	0.201	2.01	0.304	3.04	1.03	0.413723	1
510	Norris	2009.4	kg m-2	pool	clearcut	WTH	intensive	31	21-40	Jack Pine	C	0-5	<500	100	19-42 (avg)	42	Mid	BC	C	CHN	INCEP	Saskatchewan, Canada	NE NAM	0.201	2.01	0.591	5.91	3.9	1.07851	1
511	Norris	2009.4	kg m-2	pool	clearcut	WTH	intensive	4	0-5	Jack Pine	C	0-5	<500	100	42-100 (avg)	100	V_Deep	BC	C	CHN	INCEP	Saskatchewan, Canada	NE NAM	0.359	3.59	0.508	5.08	1.49	0.347159	1
512	Norris	2009.4	kg m-2	pool	clearcut	WTH	intensive	12	6-20	Jack Pine	C	0-5	<500	100	42-100 (avg)	100	V_Deep	BC	C	CHN	INCEP	Saskatchewan, Canada	NE NAM	0.359	3.59	0.288	2.88	-0.71	-0.220362	1
513	Norris	2009.4	kg m-2	pool	clearcut	WTH	intensive	31	21-40	Jack Pine	C	0-5	<500	100	42-100 (avg)	100	V_Deep	BC	C	CHN	INCEP	Saskatchewan, Canada	NE NAM	0.359	3.59	0.695	6.95	3.36	0.660589	1
514	Gartzia-Bengoetxea	2009.5	g kg-1	conc	clearcut	sawlog	intensive	3	0-5	Radiata Pine	C	10.1-15	1401-1800	5	0-5	5	Top	A	C	CHN	ENT	Spain	EUR	84.1	84.1	52.06	52.06	-32.04	-0.47961	1
515	Gartzia-Bengoetxea	2009.5	g kg-1	conc	clearcut	sawlog	intensive	16	6-20	Radiata Pine	C	10.1-15	1401-1800	5	0-5	5	Top	A	C	CHN	ENT	Spain	EUR	84.1	84.1	65.53	65.53	-18.57	-0.249499	1
516	Tang	2009.6	g m-2	pool	clearcut			2		Aspen	H	0-5	751-1000	60	0-10	10	Top	A	C	CHN	SPOD	WI/MI, USA	NE NAM	2168.5	21.685	1552.5	15.525	-6.16	-0.334169	1	CTRL is mixed hardwoods
517	Tang	2009.6	g m-2	pool	clearcut			11		Aspen	H	0-5	751-1000	60	0-10	10	Top	A	C	CHN	SPOD	WI/MI, USA	NE NAM	2168.5	21.685	2690.9	26.909	5.224	0.21584	1	CTRL is mixed hardwoods
518	Tang	2009.6	g m-2	pool	clearcut			27		Aspen	H	0-5	751-1000	60	0-10	10	Top	A	C	CHN	SPOD	WI/MI, USA	NE NAM	2168.5	21.685	1589	15.89	-5.795	-0.310931	1	CTRL is mixed hardwoods
519	Tang	2009.6	g m-2	pool	clearcut			74		Mix	H	0-5	751-1000	60	0-10	10	Top	A	C	CHN	SPOD	WI/MI, USA	NE NAM	2168.5	21.685	3179.2	31.792	10.107	0.382594	1	CTRL is mixed hardwoods
520	Tang	2009.6	g m-2	pool	clearcut			2		Aspen	H	0-5	751-1000	60	10-30	30	Mid	BC	C	CHN	SPOD	WI/MI, USA	NE NAM	3548.3	35.483	2551.3	25.513	-9.97	-0.329866	1	CTRL is mixed hardwoods
521	Tang	2009.6	g m-2	pool	clearcut			11		Aspen	H	0-5	751-1000	60	10-30	30	Mid	BC	C	CHN	SPOD	WI/MI, USA	NE NAM	3548.3	35.483	2484.1	24.841	-10.642	-0.356558	1	CTRL is mixed hardwoods
522	Tang	2009.6	g m-2	pool	clearcut			27		Aspen	H	0-5	751-1000	60	10-30	30	Mid	BC	C	CHN	SPOD	WI/MI, USA	NE NAM	3548.3	35.483	3382.1	33.821	-1.662	-0.0479718	1	CTRL is mixed hardwoods
523	Tang	2009.6	g m-2	pool	clearcut			74		Mix	H	0-5	751-1000	60	10-30	30	Mid	BC	C	CHN	SPOD	WI/MI, USA	NE NAM	3548.3	35.483	3213.7	32.137	-3.346	-0.0990457	1	CTRL is mixed hardwoods
524	Tang	2009.6	g m-2	pool	clearcut			2		Aspen	H	0-5	751-1000	60	30-60	60	Deep	BC	C	CHN	SPOD	WI/MI, USA	NE NAM	4858.7	48.587	4380.1	43.801	-4.786	-0.103699	1	CTRL is mixed hardwoods
525	Tang	2009.6	g m-2	pool	clearcut			11		Aspen	H	0-5	751-1000	60	30-60	60	Deep	BC	C	CHN	SPOD	WI/MI, USA	NE NAM	4858.7	48.587	1966.9	19.669	-28.918	-0.904312	1	CTRL is mixed hardwoods
526	Tang	2009.6	g m-2	pool	clearcut			27		Aspen	H	0-5	751-1000	60	30-60	60	Deep	BC	C	CHN	SPOD	WI/MI, USA	NE NAM	4858.7	48.587	4347.6	43.476	-5.111	-0.111147	1	CTRL is mixed hardwoods
527	Tang	2009.6	g m-2	pool	clearcut			74		Mix	H	0-5	751-1000	60	30-60	60	Deep	BC	C	CHN	SPOD	WI/MI, USA	NE NAM	4858.7	48.587	3025.9	30.259	-18.328	-0.473562	1	CTRL is mixed hardwoods
528	Bisbing	2010.1	Mg ha-1	pool	clearcut			45	>40	Larch / Douglas fir	C	0-5	500-750	100	O	0	O	O	F	CHN	INCEP	MT, USA	NW NAM	22.48	22.48	6.23	6.23	-16.25	-1.28325	1
529	Bisbing	2010.1	Mg ha-1	pool	clearcut			30	21-40	Larch / Douglas fir	C	0-5	500-750	100	O	0	O	O	F	CHN	ALF	MT, USA	NW NAM	24.74	24.74	4.53	4.53	-20.21	-1.6977	1
530	Bisbing	2010.1	Mg ha-1	pool	clearcut			45	>40	Larch / Douglas fir	C	0-5	500-750	100	O	0	O	O	F	CHN	ALF	MT, USA	NW NAM	24.06	24.06	4.01	4.01	-20.05	-1.79176	1
531	Bisbing	2010.1	Mg ha-1	pool	clearcut			45	>40	Larch / Douglas fir	C	0-5	500-750	100	0-100	100	Whole	ABC	F	CHN	INCEP	MT, USA	NW NAM	86.38	86.38	81.88	81.88	-4.5	-0.0535014	1
532	Bisbing	2010.1	Mg ha-1	pool	clearcut			30	21-40	Larch / Douglas fir	C	0-5	500-750	100	0-100	100	Whole	ABC	F	CHN	ALF	MT, USA	NW NAM	53.86	53.86	51.34	51.34	-2.52	-0.0479179	1
533	Bisbing	2010.1	Mg ha-1	pool	clearcut			45	>40	Larch / Douglas fir	C	0-5	500-750	100	0-100	100	Whole	ABC	F	CHN	ALF	MT, USA	NW NAM	86.38	86.38	50.02	50.02	-36.36	-0.546333	1
534	Wu	2010.2	g kg-1	conc	clearcut			10	6-20	Chestnut	H	16-20	1401-1800	20	0-20	20	Top	A	F	W-B	OX	China	ASIA	24.6	24.6	13.4	13.4	-11.2	-0.607492	1	CTRL is natural broadleaf forest
535	Rothstein and Spaulding	2010.3	kg m-2	pool	clearcut	WTH			0-5	Jack Pine	C	5-7.5		30	O	0	O	O	C	CHN	ENT	MI, USA	NE NAM	1.16	11.6	1.22	12.2	0.6	0.0504309	1
536	Rothstein and Spaulding	2010.3	kg m-2	pool	clearcut	WTH			6-20	Jack Pine	C	5-7.5		30	O	0	O	O	C	CHN	ENT	MI, USA	NE NAM	1.16	11.6	0.93	9.3	-2.3	-0.220991	1
537	Rothstein and Spaulding	2010.3	kg m-2	pool	clearcut	WTH			0-5	Jack Pine	C	5-7.5		30	0-15	15	Top	A	C	CHN	ENT	MI, USA	NE NAM	2.13	21.3	2.58	25.8	4.5	0.191667	1
538	Rothstein and Spaulding	2010.3	kg m-2	pool	clearcut	WTH			6-20	Jack Pine	C	5-7.5		30	0-15	15	Top	A	C	CHN	ENT	MI, USA	NE NAM	2.13	21.3	2.45	24.5	3.2	0.139966	1
539	Rothstein and Spaulding	2010.3	kg m-2	pool	clearcut	WTH			0-5	Jack Pine	C	5-7.5		30	15-30	30	Mid	BC	C	CHN	ENT	MI, USA	NE NAM	1.32	13.2	1.1	11	-2.2	-0.182322	1
540	Rothstein and Spaulding	2010.3	kg m-2	pool	clearcut	WTH			6-20	Jack Pine	C	5-7.5		30	15-30	30	Mid	BC	C	CHN	ENT	MI, USA	NE NAM	1.32	13.2	1.15	11.5	-1.7	-0.13787	1
541	Jones	2011.1	Mg ha-1	pool	clearcut	WTH	remove	15	6-20	Radiata Pine	C	10.1-15	1401-1800	30	O	0	O	O	C	CHN	AND	New Zealand	PAC	17.88	17.88	14.81	14.81	-3.07	-0.18838	1	yes, forest floor data is pool, soil only as conc
542	Jones	2011.1	Mg ha-1	pool	clearcut	WTH		15	6-20	Radiata Pine	C	10.1-15	1401-1800	30	O	0	O	O	C	CHN	AND	New Zealand	PAC	18.09	18.09	14.36	14.36	-3.73	-0.230913	1
543	Jones	2011.1	Mg ha-1	pool	clearcut	sawlog		15	6-20	Radiata Pine	C	10.1-15	1401-1800	30	O	0	O	O	C	CHN	AND	New Zealand	PAC	14.14	14.14	16.85	16.85	2.71	0.175343	1
544	Jones	2011.1	g kg-1	conc	clearcut	WTH	remove	15	6-20	Radiata Pine	C	10.1-15	1401-1800	30	0-10	10	Top	A	C	CHN	AND	New Zealand	PAC	6.49	6.49	5.75	5.75	-0.74	-0.121063	1
545	Jones	2011.1	g kg-1	conc	clearcut	WTH		15	6-20	Radiata Pine	C	10.1-15	1401-1800	30	0-10	10	Top	A	C	CHN	AND	New Zealand	PAC	6.28	6.28	6.74	6.74	0.46	0.0706899	1
546	Jones	2011.1	g kg-1	conc	clearcut	sawlog		15	6-20	Radiata Pine	C	10.1-15	1401-1800	30	0-10	10	Top	A	C	CHN	AND	New Zealand	PAC	6.37	6.37	7.06	7.06	0.69	0.102846	1
547	Jones	2011.1	g kg-1	conc	clearcut	WTH	remove	15	6-20	Radiata Pine	C	10.1-15	1401-1800	30	10-20	20	Mid	BC	C	CHN	AND	New Zealand	PAC	3.14	3.14	2.73	2.73	-0.41	-0.139921	1
548	Jones	2011.1	g kg-1	conc	clearcut	WTH		15	6-20	Radiata Pine	C	10.1-15	1401-1800	30	10-20	20	Mid	BC	C	CHN	AND	New Zealand	PAC	3.2	3.2	3.42	3.42	0.22	0.0664897	1
549	Jones	2011.1	g kg-1	conc	clearcut	sawlog		15	6-20	Radiata Pine	C	10.1-15	1401-1800	30	10-20	20	Mid	BC	C	CHN	AND	New Zealand	PAC	3.03	3.03	3.21	3.21	0.18	0.0577083	1
550	Jones	2011.1	g kg-1	conc	clearcut	WTH	remove	15	6-20	Radiata Pine	C	10.1-15	1401-1800	30	20-30	30	Mid	BC	C	CHN	AND	New Zealand	PAC	1.54	1.54	1.51	1.51	-0.03	-0.0196728	1
551	Jones	2011.1	g kg-1	conc	clearcut	WTH		15	6-20	Radiata Pine	C	10.1-15	1401-1800	30	20-30	30	Mid	BC	C	CHN	AND	New Zealand	PAC	2.01	2.01	1.88	1.88	-0.13	-0.0668629	1
552	Jones	2011.1	g kg-1	conc	clearcut	sawlog		15	6-20	Radiata Pine	C	10.1-15	1401-1800	30	20-30	30	Mid	BC	C	CHN	AND	New Zealand	PAC	1.73	1.73	1.6	1.6	-0.13	-0.0781178	1
553	Trettin	2011.2	t ha-1	pool	clearcut	WTH		11	6-20	Mix	C	5-7.5	751-1000	150	O	0	O	O	C	CHN	SPOD	MI, USA	NE NAM	75.9	75.9	67.8	67.8	-8.1	-0.112854	1
554	Trettin	2011.2	t ha-1	pool	clearcut	WTH	intensive	11	6-20	Mix	C	5-7.5	751-1000	150	O	0	O	O	C	CHN	SPOD	MI, USA	NE NAM	75.9	75.9	50.1	50.1	-25.8	-0.415396	1
555	Trettin	2011.2	t ha-1	pool	clearcut	WTH		11	6-20	Mix	C	5-7.5	751-1000	150	0-30	30	Top	A	C	CHN	SPOD	MI, USA	NE NAM	24.7	24.7	25.4	25.4	0.7	0.0279459	1
556	Trettin	2011.2	t ha-1	pool	clearcut	WTH	intensive	11	6-20	Mix	C	5-7.5	751-1000	150	0-30	30	Top	A	C	CHN	SPOD	MI, USA	NE NAM	24.7	24.7	28.8	28.8	4.1	0.153572	1
557	Trettin	2011.2	t ha-1	pool	clearcut	WTH		11	6-20	Mix	C	5-7.5	751-1000	150	30-150	150	V_Deep	BC	C	CHN	SPOD	MI, USA	NE NAM	20.8	20.8	22	22	1.2	0.0560895	1
558	Trettin	2011.2	t ha-1	pool	clearcut	WTH	intensive	11	6-20	Mix	C	5-7.5	751-1000	150	30-150	150	V_Deep	BC	C	CHN	SPOD	MI, USA	NE NAM	20.8	20.8	26.1	26.1	5.3	0.226982	1
559	Zummo and Friedland	2011.3	Mg ha-1	pool	clearcut	sawlog	retain	3	0-5	Mix	H			60	0-10	10	Top	A	C	CHN	SPOD	NH, USA	NE NAM	21.9	21.9	20.7	20.7	-1.2	-0.0563529	1	retain - FF Low D. = forest floor low disturbance
560	Zummo and Friedland	2011.3	Mg ha-1	pool	clearcut	sawlog		3	0-5	Mix	H			60	0-10	10	Top	A	C	CHN	SPOD	NH, USA	NE NAM	21.9	21.9	24.2	24.2	2.3	0.099866	1	FF Mod D. = forest floor moderate disturbance
561	Zummo and Friedland	2011.3	Mg ha-1	pool	clearcut	sawlog	remove	3	0-5	Mix	H			60	0-10	10	Top	A	C	CHN	SPOD	NH, USA	NE NAM	21.9	21.9	20.5	20.5	-1.4	-0.0660618	1	remove - FF High D. = forest floor high disturbance
562	Zummo and Friedland	2011.3	Mg ha-1	pool	clearcut	sawlog	retain	3	0-5	Mix	H			60	10-20	20	Mid	BC	C	CHN	SPOD	NH, USA	NE NAM	20.8	20.8	24.6	24.6	3.8	0.167793	1	retain - FF Low D. = forest floor low disturbance
563	Zummo and Friedland	2011.3	Mg ha-1	pool	clearcut	sawlog		3	0-5	Mix	H			60	10-20	20	Mid	BC	C	CHN	SPOD	NH, USA	NE NAM	20.8	20.8	19	19	-1.8	-0.090514	1	FF Mod D. = forest floor moderate disturbance
564	Zummo and Friedland	2011.3	Mg ha-1	pool	clearcut	sawlog	remove	3	0-5	Mix	H			60	10-20	20	Mid	BC	C	CHN	SPOD	NH, USA	NE NAM	20.8	20.8	13.3	13.3	-7.5	-0.447189	1	remove - FF High D. = forest floor high disturbance
565	Zummo and Friedland	2011.3	Mg ha-1	pool	clearcut	sawlog	retain	3	0-5	Mix	H			60	20-30	30	Mid	BC	C	CHN	SPOD	NH, USA	NE NAM	13.4	13.4	20.7	20.7	7.3	0.434879	1	retain - FF Low D. = forest floor low disturbance
566	Zummo and Friedland	2011.3	Mg ha-1	pool	clearcut	sawlog		3	0-5	Mix	H			60	20-30	30	Mid	BC	C	CHN	SPOD	NH, USA	NE NAM	13.4	13.4	15.6	15.6	2.2	0.152016	1	FF Mod D. = forest floor moderate disturbance
567	Zummo and Friedland	2011.3	Mg ha-1	pool	clearcut	sawlog	remove	3	0-5	Mix	H			60	20-30	30	Mid	BC	C	CHN	SPOD	NH, USA	NE NAM	13.4	13.4	12	12	-1.4	-0.110348	1	remove - FF High D. = forest floor high disturbance
568	Zummo and Friedland	2011.3	Mg ha-1	pool	clearcut	sawlog	retain	3	0-5	Mix	H			60	30-45	45	Deep	BC	C	CHN	SPOD	NH, USA	NE NAM	15.3	15.3	18.5	18.5	3.2	0.189918	1	retain - FF Low D. = forest floor low disturbance
569	Zummo and Friedland	2011.3	Mg ha-1	pool	clearcut	sawlog		3	0-5	Mix	H			60	30-45	45	Deep	BC	C	CHN	SPOD	NH, USA	NE NAM	15.3	15.3	12.6	12.6	-2.7	-0.194156	1	FF Mod D. = forest floor moderate disturbance
570	Zummo and Friedland	2011.3	Mg ha-1	pool	clearcut	sawlog	remove	3	0-5	Mix	H			60	30-45	45	Deep	BC	C	CHN	SPOD	NH, USA	NE NAM	15.3	15.3	13.3	13.3	-2	-0.140089	1	remove - FF High D. = forest floor high disturbance
571	Zummo and Friedland	2011.3	Mg ha-1	pool	clearcut	sawlog	retain	3	0-5	Mix	H			60	45-60	60	Deep	BC	C	CHN	SPOD	NH, USA	NE NAM	13.8	13.8	8.9	8.9	-4.9	-0.438617	1	retain - FF Low D. = forest floor low disturbance
572	Zummo and Friedland	2011.3	Mg ha-1	pool	clearcut	sawlog		3	0-5	Mix	H			60	45-60	60	Deep	BC	C	CHN	SPOD	NH, USA	NE NAM	13.8	13.8	8.4	8.4	-5.4	-0.496437	1	FF Mod D. = forest floor moderate disturbance
573	Zummo and Friedland	2011.3	Mg ha-1	pool	clearcut	sawlog	remove	3	0-5	Mix	H			60	45-60	60	Deep	BC	C	CHN	SPOD	NH, USA	NE NAM	13.8	13.8	11	11	-2.8	-0.226773	1	remove - FF High D. = forest floor high disturbance
574	Powers	2011.4	Mg ha-1	pool	thin	sawlog		29	21-40	Red Pine	C			30	O	0	O	O	C	CHN		MN, USA	NE NAM	9.93	9.93	10.47	10.47	0.54	0.0529535	1	thin(1) = thin to 14 m2 ha-1 density
575	Powers	2011.4	Mg ha-1	pool	thin	sawlog		29	21-40	Red Pine	C			30	O	0	O	O	C	CHN		MN, USA	NE NAM	9.93	9.93	12.22	12.22	2.29	0.207513	1	thin(2) = thin to 18 m2 ha-1 density
576	Powers	2011.4	Mg ha-1	pool	thin	sawlog		8	6-20	Red Pine	C			30	O	0	O	O	C	CHN		MN, USA	NE NAM	9.93	9.93	7.99	7.99	-1.94	-0.21737	1	thin(3) = thin to 23 m2 ha-1 density
577	Powers	2011.4	Mg ha-1	pool	thin	sawlog		8	6-20	Red Pine	C			30	O	0	O	O	C	CHN		MN, USA	NE NAM	9.93	9.93	8.59	8.59	-1.34	-0.144962	1	thin(4) = thin to 28 m2 ha-1 density
578	Powers	2011.4	Mg ha-1	pool	thin	sawlog		8	6-20	Red Pine	C			30	O	0	O	O	C	CHN		MN, USA	NE NAM	9.93	9.93	9.33	9.33	-0.6	-0.0623255	1	thin(5) = thin to 32 m2 ha-1 density
579	Powers	2011.4	Mg ha-1	pool	thin	sawlog		3	0-5	Mix	H			30	O	0	O	O	C	CHN		WI, USA	NE NAM	6.17	6.17	4.4	4.4	-1.77	-0.338094	1	selection(1) = single tree selection to 14 m2 ha-1 residual density
580	Powers	2011.4	Mg ha-1	pool	thin	sawlog		3	0-5	Mix	H			30	O	0	O	O	C	CHN		WI, USA	NE NAM	6.17	6.17	4.08	4.08	-2.09	-0.413602	1	selection(2) = single tree selection to 17 m2 ha-1 residual density
581	Powers	2011.4	Mg ha-1	pool	thin	sawlog		3	0-5	Mix	H			30	O	0	O	O	C	CHN		WI, USA	NE NAM	6.17	6.17	4.83	4.83	-1.34	-0.244852	1	selection(3) = single tree selection to 21 m2 ha-1 residual density
582	Powers	2011.4	Mg ha-1	pool	thin	sawlog		12	6-20	Mix	H			30	O	0	O	O	C	CHN		WI, USA	NE NAM	6.17	6.17	3.27	3.27	-2.9	-0.634909	1	thin(6) = thin all stems > 20 cm diameter
583	Powers	2011.4	Mg ha-1	pool	thin	sawlog		29	21-40	Mix	H			30	O	0	O	O	C	CHN		WI, USA	NE NAM	6.17	6.17	4.19	4.19	-1.98	-0.386998	1	see article for description
584	Powers	2011.4	Mg ha-1	pool	thin	sawlog		29	21-40	Red Pine	C			30	0-30	30	Top	A	C	CHN		MN, USA	NE NAM	52.35	52.35	51.54	51.54	-0.81	-0.0155937	1	thin(1) = thin to 14 m2 ha-1 density
585	Powers	2011.4	Mg ha-1	pool	thin	sawlog		29	21-40	Red Pine	C			30	0-30	30	Top	A	C	CHN		MN, USA	NE NAM	52.35	52.35	45.64	45.64	-6.71	-0.137167	1	thin(2) = thin to 18 m2 ha-1 density
586	Powers	2011.4	Mg ha-1	pool	thin	sawlog		8	6-20	Red Pine	C			30	0-30	30	Top	A	C	CHN		MN, USA	NE NAM	52.35	52.35	42.95	42.95	-9.4	-0.197915	1	thin(3) = thin to 23 m2 ha-1 density
587	Powers	2011.4	Mg ha-1	pool	thin	sawlog		8	6-20	Red Pine	C			30	0-30	30	Top	A	C	CHN		MN, USA	NE NAM	52.35	52.35	42.95	42.95	-9.4	-0.197915	1	thin(4) = thin to 28 m2 ha-1 density
588	Powers	2011.4	Mg ha-1	pool	thin	sawlog		8	6-20	Red Pine	C			30	0-30	30	Top	A	C	CHN		MN, USA	NE NAM	52.35	52.35	41.07	41.07	-11.28	-0.242674	1	thin(5) = thin to 32 m2 ha-1 density
589	Powers	2011.4	Mg ha-1	pool	thin	sawlog		3	0-5	Mix	H			30	0-30	30	Top	A	C	CHN		WI, USA	NE NAM	77.32	77.32	75.3	75.3	-2.02	-0.0264725	1	selection(1) = single tree selection to 14 m2 ha-1 residual density
590	Powers	2011.4	Mg ha-1	pool	thin	sawlog		3	0-5	Mix	H			30	0-30	30	Top	A	C	CHN		WI, USA	NE NAM	77.32	77.32	78.52	78.52	1.2	0.0154007	1	selection(2) = single tree selection to 17 m2 ha-1 residual density
591	Powers	2011.4	Mg ha-1	pool	thin	sawlog		3	0-5	Mix	H			30	0-30	30	Top	A	C	CHN		WI, USA	NE NAM	77.32	77.32	78.52	78.52	1.2	0.0154007	1	selection(3) = single tree selection to 21 m2 ha-1 residual density
592	Powers	2011.4	Mg ha-1	pool	thin	sawlog		12	6-20	Mix	H			30	0-30	30	Top	A	C	CHN		WI, USA	NE NAM	77.32	77.32	79.3	79.3	1.98	0.0252855	1	thin(6) = thin all stems > 20 cm diameter
593	Powers	2011.4	Mg ha-1	pool	thin	sawlog		29	21-40	Mix	H			30	0-30	30	Top	A	C	CHN		WI, USA	NE NAM	77.32	77.32	71.68	71.68	-5.64	-0.0757409	1	see article for description
594	Falsone	2012.1	kg m-2	pool	clearcut	sawlog		5	0-5	Norway Spruce	C	0-5	500-750	130	O	0	O	O	C	CHN	SPOD	Russia	EUR	0.94	9.4	1.46	14.6	5.2	0.440312	1
595	Falsone	2012.1	kg m-2	pool	clearcut	sawlog		5	0-5	Norway Spruce	C	0-5	500-750	130	0-47	47	Mid	BC	C	CHN	SPOD	Russia	EUR	2.21	22.1	4.42	44.2	22.1	0.693147	1
596	Falsone	2012.1	kg m-2	pool	clearcut	sawlog		5	0-5	Norway Spruce	C	0-5	500-750	130	47-130	130	V_Deep	BC	C	CHN	SPOD	Russia	EUR	1.32	13.2	1.55	15.5	2.3	0.160623	1
597	Grand and LavKulich	2012.2	kg m-2	pool	clearcut	sawlog			0-5	Douglas Fir	C	10.1-15	1001-1400	80	O	0	O	O	C	CHN	SPOD	Brit. Col.	NW NAM	3.6	36	5.9	59	23	0.494019	1
598	Grand and LavKulich	2012.2	kg m-2	pool	clearcut	sawlog			6-20	Douglas Fir	C	10.1-15	1001-1400	80	O	0	O	O	C	CHN	SPOD	Brit. Col.	NW NAM	3.6	36	7.6	76	40	0.747214	1
599	Grand and LavKulich	2012.2	kg m-2	pool	clearcut	sawlog			0-5	Douglas Fir	C	10.1-15	1001-1400	80			Deep	BC	C	CHN	SPOD	Brit. Col.	NW NAM	11.1	111	13.1	131	20	0.165667	1
600	Grand and LavKulich	2012.2	kg m-2	pool	clearcut	sawlog			6-20	Douglas Fir	C	10.1-15	1001-1400	80			Deep	BC	C	CHN	SPOD	Brit. Col.	NW NAM	11.1	111	8.5	85	-26	-0.266879	1
601	Grand and LavKulich	2012.2	kg m-2	pool	clearcut	sawlog			0-5	Douglas Fir	C	10.1-15	1001-1400	80			Top	A	C	CHN	SPOD	Brit. Col.	NW NAM	1.1	11	1	10	-1	-0.0953102	1
602	Grand and LavKulich	2012.2	kg m-2	pool	clearcut	sawlog			6-20	Douglas Fir	C	10.1-15	1001-1400	80			Top	A	C	CHN	SPOD	Brit. Col.	NW NAM	1.1	11	1.1	11	0	0	1
603	Gupta and DeLuca	2012.3	Mg ha-1	pool	clearcut	sawlog		3	0-5	Sitka Spruce	C			50	O	0	O	O	F	CHN	SPOD	Wales	EUR	35.12	35.12	0.5	0.5	-34.62	-4.25192	1
604	Gupta and DeLuca	2012.3	Mg ha-1	pool	clearcut	sawlog		5	0-5	Sitka Spruce	C			50	O	0	O	O	F	CHN	SPOD	Wales	EUR	22	22	9.46	9.46	-12.54	-0.84397	1
605	Gupta and DeLuca	2012.3	Mg ha-1	pool	clearcut	sawlog		8	6-20	Sitka Spruce	C			50	O	0	O	O	F	CHN	SPOD	Wales	EUR	10.05	10.05	0.5	0.5	-9.55	-3.00072	1
606	Gupta and DeLuca	2012.3	Mg ha-1	pool	clearcut	sawlog		3	0-5	Sitka Spruce	C			50	0-10	10	Top	A	F	CHN	SPOD	Wales	EUR	24.68	24.68	35.24	35.24	10.56	0.356189	1
607	Gupta and DeLuca	2012.3	Mg ha-1	pool	clearcut	sawlog		5	0-5	Sitka Spruce	C			50	0-10	10	Top	A	F	CHN	SPOD	Wales	EUR	31.97	31.97	71.87	71.87	39.9	0.810061	1
608	Gupta and DeLuca	2012.3	Mg ha-1	pool	clearcut	sawlog		8	6-20	Sitka Spruce	C			50	0-10	10	Top	A	F	CHN	SPOD	Wales	EUR	41.85	41.85	42.05	42.05	0.2	0.00476759	1
609	Gupta and DeLuca	2012.3	Mg ha-1	pool	clearcut	sawlog		3	0-5	Sitka Spruce	C			50	10-20	20	Mid	BC	F	CHN	SPOD	Wales	EUR	10.94	10.94	25.06	25.06	14.12	0.828847	1
610	Gupta and DeLuca	2012.3	Mg ha-1	pool	clearcut	sawlog		5	0-5	Sitka Spruce	C			50	10-20	20	Mid	BC	F	CHN	SPOD	Wales	EUR	8.44	8.44	24.3	24.3	15.86	1.05749	1
611	Gupta and DeLuca	2012.3	Mg ha-1	pool	clearcut	sawlog		8	6-20	Sitka Spruce	C			50	10-20	20	Mid	BC	F	CHN	SPOD	Wales	EUR	30.77	30.77	20.31	20.31	-10.46	-0.415427	1
612	Gupta and DeLuca	2012.3	Mg ha-1	pool	clearcut	sawlog		3	0-5	Sitka Spruce	C			50	20-50	50	Deep	BC	F	CHN	SPOD	Wales	EUR	18.19	18.19	39.44	39.44	21.25	0.773909	1
613	Gupta and DeLuca	2012.3	Mg ha-1	pool	clearcut	sawlog		5	0-5	Sitka Spruce	C			50	20-50	50	Deep	BC	F	CHN	SPOD	Wales	EUR	14.83	14.83	32.74	32.74	17.91	0.791945	1
614	Gupta and DeLuca	2012.3	Mg ha-1	pool	clearcut	sawlog		8	6-20	Sitka Spruce	C			50	20-50	50	Deep	BC	F	CHN	SPOD	Wales	EUR	59.59	59.59	32	32	-27.59	-0.621752	1
615	Saynes	2012.4	mg g-1	conc	thin			1	0-5	Mix	C	16-20	751-1000	5	0-5	5	Top	A	C	TOC	ULT	Mexico	SW NAM	158.8	158.8	93.7	93.7	-65.1	-0.527547	1	dry region / dry
616	Saynes	2012.4	mg g-1	conc	thin			1	0-5	Mix	C	16-20	751-1000	5	0-5	5	Top	A	C	TOC	ULT	Mexico	SW NAM	220.2	220.2	85	85	-135.2	-0.951885	1	dry region / wet
617	Saynes	2012.4	mg g-1	conc	thin			20	6-20	Mix	C	16-20	751-1000	5	0-5	5	Top	A	C	TOC	ULT	Mexico	SW NAM	158.8	158.8	154.5	154.5	-4.3	-0.0274515	1	dry region / dry
618	Saynes	2012.4	mg g-1	conc	thin			20	6-20	Mix	C	16-20	751-1000	5	0-5	5	Top	A	C	TOC	ULT	Mexico	SW NAM	220.2	220.2	163.8	163.8	-56.4	-0.29589	1	dry region / wet
619	Saynes	2012.4	mg g-1	conc	thin			1	0-5	Mix	C	16-20	1001-1400	5	0-5	5	Top	A	C	TOC	ULT	Mexico	SW NAM	146.4	146.4	189.8	189.8	43.4	0.259628	1	wet region / dry
620	Saynes	2012.4	mg g-1	conc	thin			1	0-5	Mix	C	16-20	1001-1400	5	0-5	5	Top	A	C	TOC	ULT	Mexico	SW NAM	124.5	124.5	222.5	222.5	98	0.580621	1	wet region / wet
621	Saynes	2012.4	mg g-1	conc	thin			20	6-20	Mix	C	16-20	1001-1400	5	0-5	5	Top	A	C	TOC	ULT	Mexico	SW NAM	146.4	146.4	109.3	109.3	-37.1	-0.292246	1	wet region / dry
622	Saynes	2012.4	mg g-1	conc	thin			20	6-20	Mix	C	16-20	1001-1400	5	0-5	5	Top	A	C	TOC	ULT	Mexico	SW NAM	124.5	124.5	150	150	25.5	0.18633	1	wet region / wet
623	Slesak	2012.5	%	conc	clearcut	sawlog	retain	5	0-5	Fir	C	10.1-15	>1800	60	0-15	15	Top	A	C	CHN	ENT	WA, USA	NW NAM	5.7	5.7	6.09	6.09	0.39	0.0661819	1
624	Slesak	2012.5	%	conc	clearcut	WTH	remove	5	0-5	Fir	C	10.1-15	>1800	60	0-15	15	Top	A	C	CHN	ENT	WA, USA	NW NAM	5.81	5.81	5.7	5.7	-0.11	-0.0191144	1
625	Slesak	2012.5	%	conc	clearcut	sawlog	retain	5	0-5	Fir	C	10.1-15	1401-1800	60	0-15	15	Top	A	F	CHN	INCEP	OR, USA	NW NAM	6.44	6.44	6.93	6.93	0.49	0.0733313	1
626	Slesak	2012.5	%	conc	clearcut	WTH	remove	5	0-5	Fir	C	10.1-15	1401-1800	60	0-15	15	Top	A	F	CHN	INCEP	OR, USA	NW NAM	6.69	6.69	7.57	7.57	0.88	0.123579	1
627	Slesak	2012.5	%	conc	clearcut	sawlog	retain	5	0-5	Fir	C	10.1-15	>1800	60	15-30	30	Mid	BC	C	CHN	ENT	WA, USA	NW NAM	3.5	3.5	4.03	4.03	0.53	0.141003	1
628	Slesak	2012.5	%	conc	clearcut	WTH	remove	5	0-5	Fir	C	10.1-15	>1800	60	15-30	30	Mid	BC	C	CHN	ENT	WA, USA	NW NAM	3.06	3.06	3.72	3.72	0.66	0.195309	1
629	Slesak	2012.5	%	conc	clearcut	sawlog	retain	5	0-5	Fir	C	10.1-15	1401-1800	60	15-30	30	Mid	BC	F	CHN	INCEP	OR, USA	NW NAM	4.4	4.4	4.26	4.26	-0.14	-0.0323354	1
630	Slesak	2012.5	%	conc	clearcut	WTH	remove	5	0-5	Fir	C	10.1-15	1401-1800	60	15-30	30	Mid	BC	F	CHN	INCEP	OR, USA	NW NAM	4.92	4.92	4.98	4.98	0.06	0.0121214	1
631	Slesak	2012.5	%	conc	clearcut	sawlog	retain	5	0-5	Fir	C	10.1-15	>1800	60	30-60	60	Deep	BC	C	CHN	ENT	WA, USA	NW NAM	2.03	2.03	2.36	2.36	0.33	0.150626	1
632	Slesak	2012.5	%	conc	clearcut	WTH	remove	5	0-5	Fir	C	10.1-15	>1800	60	30-60	60	Deep	BC	C	CHN	ENT	WA, USA	NW NAM	2.11	2.11	2.27	2.27	0.16	0.0730919	1
633	Slesak	2012.5	%	conc	clearcut	sawlog	retain	5	0-5	Fir	C	10.1-15	1401-1800	60	30-60	60	Deep	BC	F	CHN	INCEP	OR, USA	NW NAM	2.59	2.59	2.45	2.45	-0.14	-0.0555699	1
634	Slesak	2012.5	%	conc	clearcut	WTH	remove	5	0-5	Fir	C	10.1-15	1401-1800	60	30-60	60	Deep	BC	F	CHN	INCEP	OR, USA	NW NAM	3.01	3.01	2.84	2.84	-0.17	-0.058136	1
635	Christophel a	2013.1	Mg ha-1	pool	thin	sawlog	selective		0-5	Mix	C	5-7.5	>1800	30	O	0	O	O	F	CHN	INCEP	Germany	EUR	142	142	40	40	-102	-1.26695	1	LOI site
636	Christophel a	2013.1	Mg ha-1	pool	thin	sawlog	selective	17	6-20	Mix	C	5-7.5	>1800	30	O	0	O	O	F	CHN	ENT	Germany	EUR	7	7	5	5	-2	-0.336472	1	MANG ste
637	Christophel a	2013.1	Mg ha-1	pool	thin	sawlog	selective	13	6-20	Mix	C	5-7.5	>1800	30	O	0	O	O	F	CHN	ENT	Germany	EUR	114	114	25	25	-89	-1.51732	1	WETT site
638	Christophel a	2013.1	Mg ha-1	pool	thin	sawlog	selective		0-5	Mix	C	5-7.5	>1800	30	0-30	30	Top	A	C	CHN	INCEP	Germany	EUR	54	54	66	66	12	0.200671	1	LOI site
639	Christophel a	2013.1	Mg ha-1	pool	thin	sawlog	selective	17	6-20	Mix	C	5-7.5	>1800	30	0-30	30	Top	A	C	CHN	ENT	Germany	EUR	84	84	67	67	-17	-0.226124	1	MANG ste
640	Christophel a	2013.1	Mg ha-1	pool	thin	sawlog	selective	13	6-20	Mix	C	5-7.5	>1800	30	0-30	30	Top	A	C	CHN	ENT	Germany	EUR	55	55	65	65	10	0.167054	1	WETT site
641	Klockow	2013.2	Mg ha-1	pool	clearcut	WTH	remove	1	0-5	Aspen	H	0-5	500-750	20	O	0	O	O	F	CHN	ALF	MN, USA	NE NAM	10.97	10.97	12.14	12.14	1.17	0.101342	1
642	Klockow	2013.2	Mg ha-1	pool	clearcut	WTH	remove	1	0-5	Aspen	H	0-5	500-750	20	O	0	O	O	F	CHN	ALF	MN, USA	NE NAM	10.97	10.97	13.95	13.95	2.98	0.240315	1
643	Klockow	2013.2	Mg ha-1	pool	clearcut	sawlog	retain	1	0-5	Aspen	H	0-5	500-750	20	O	0	O	O	F	CHN	ALF	MN, USA	NE NAM	10.97	10.97	13.24	13.24	2.27	0.188078	1
644	Klockow	2013.2	Mg ha-1	pool	clearcut	WTH	remove	1	0-5	Aspen	H	0-5	500-750	20	0-5	5	Top	A	F	CHN	ALF	MN, USA	NE NAM	25.51	25.51	23.91	23.91	-1.6	-0.0647738	1
645	Klockow	2013.2	Mg ha-1	pool	clearcut	WTH	remove	1	0-5	Aspen	H	0-5	500-750	20	0-5	5	Top	A	F	CHN	ALF	MN, USA	NE NAM	25.51	25.51	26.93	26.93	1.42	0.0541704	1
646	Klockow	2013.2	Mg ha-1	pool	clearcut	sawlog	retain	1	0-5	Aspen	H	0-5	500-750	20	0-5	5	Top	A	F	CHN	ALF	MN, USA	NE NAM	25.51	25.51	25.41	25.41	-0.1	-0.00392773	1
647	Klockow	2013.2	Mg ha-1	pool	clearcut	WTH	remove	1	0-5	Aspen	H	0-5	500-750	20	5-20	20	Mid	BC	F	CHN	ALF	MN, USA	NE NAM	31.37	31.37	32.1	32.1	0.73	0.023004	1
648	Klockow	2013.2	Mg ha-1	pool	clearcut	WTH	remove	1	0-5	Aspen	H	0-5	500-750	20	5-20	20	Mid	BC	F	CHN	ALF	MN, USA	NE NAM	31.37	31.37	33.04	33.04	1.67	0.0518669	1
649	Klockow	2013.2	Mg ha-1	pool	clearcut	sawlog	retain	1	0-5	Aspen	H	0-5	500-750	20	5-20	20	Mid	BC	F	CHN	ALF	MN, USA	NE NAM	31.37	31.37	30.55	30.55	-0.82	-0.0264873	1
650	McKee	2013.3	Mg ha-1	pool	clearcut	sawlog		24	21-40	Mix	H	>20	1401-1800	60	0-15	15	Top	A	F	CHN		AL, USA	SE NAM	28.3	28.3	28.9	28.9	0.6	0.0209798	1
651	McKee	2013.3	Mg ha-1	pool	clearcut	sawlog	intensive	24	21-40	Mix	H	>20	1401-1800	60	0-15	15	Top	A	F	CHN		AL, USA	SE NAM	28.3	28.3	33.6	33.6	5.3	0.171664	1
652	McKee	2013.3	Mg ha-1	pool	clearcut	sawlog		24	21-40	Mix	H	>20	1401-1800	60	15-30	30	Mid	BC	F	CHN		AL, USA	SE NAM	22.8	22.8	22.8	22.8	0	0	1
653	McKee	2013.3	Mg ha-1	pool	clearcut	sawlog	intensive	24	21-40	Mix	H	>20	1401-1800	60	15-30	30	Mid	BC	F	CHN		AL, USA	SE NAM	22.8	22.8	24.1	24.1	1.3	0.0554513	1
654	McKee	2013.3	Mg ha-1	pool	clearcut	sawlog		24	21-40	Mix	H	>20	1401-1800	60	30-45	45	Deep	BC	F	CHN		AL, USA	SE NAM	23	23	21.7	21.7	-1.3	-0.058182	1
655	McKee	2013.3	Mg ha-1	pool	clearcut	sawlog	intensive	24	21-40	Mix	H	>20	1401-1800	60	30-45	45	Deep	BC	F	CHN		AL, USA	SE NAM	23	23	21.8	21.8	-1.2	-0.0535842	1
656	McKee	2013.3	Mg ha-1	pool	clearcut	sawlog		24	21-40	Mix	H	>20	1401-1800	60	45-60	60	Deep	BC	F	CHN		AL, USA	SE NAM	26.8	26.8	24.5	24.5	-2.3	-0.0897288	1
657	McKee	2013.3	Mg ha-1	pool	clearcut	sawlog	intensive	24	21-40	Mix	H	>20	1401-1800	60	45-60	60	Deep	BC	F	CHN		AL, USA	SE NAM	26.8	26.8	24.2	24.2	-2.6	-0.102049	1
658	Mu	2013.4	t ha-1	pool	thin	sawlog	retain	5	0-5	Mix	C	<0	500-750	50	O	0	O	O	C	TOC	SPOD	China	ASIA	3.46	3.46	2.04	2.04	-1.42	-0.528319	1	thin-25%
659	Mu	2013.4	t ha-1	pool	thin	sawlog	retain	5	0-5	Mix	C	<0	500-750	50	O	0	O	O	C	TOC	SPOD	China	ASIA	3.46	3.46	2.01	2.01	-1.45	-0.543134	1	thin-35%
660	Mu	2013.4	t ha-1	pool	thin	sawlog	retain	5	0-5	Mix	C	<0	500-750	50	O	0	O	O	C	TOC	SPOD	China	ASIA	3.46	3.46	2.15	2.15	-1.31	-0.475801	1	thin-50%
661	Mu	2013.4	t ha-1	pool	thin	sawlog	retain	5	0-5	Mix	C	<0	500-750	50	0-10	10	Top	A	C	TOC	SPOD	China	ASIA	46.8	46.8	56.93	56.93	10.13	0.195939	1	thin-25%
662	Mu	2013.4	t ha-1	pool	thin	sawlog	retain	5	0-5	Mix	C	<0	500-750	50	0-10	10	Top	A	C	TOC	SPOD	China	ASIA	46.8	46.8	30.72	30.72	-16.08	-0.420969	1	thin-35%
663	Mu	2013.4	t ha-1	pool	thin	sawlog	retain	5	0-5	Mix	C	<0	500-750	50	0-10	10	Top	A	C	TOC	SPOD	China	ASIA	46.8	46.8	44.34	44.34	-2.46	-0.053996	1	thin-50%
664	Mu	2013.4	t ha-1	pool	thin	sawlog	retain	5	0-5	Mix	C	<0	500-750	50	10-20	20	Mid	BC	C	TOC	SPOD	China	ASIA	66.78	66.78	47.3	47.3	-19.48	-0.344893	1	thin-25%
665	Mu	2013.4	t ha-1	pool	thin	sawlog	retain	5	0-5	Mix	C	<0	500-750	50	10-20	20	Mid	BC	C	TOC	SPOD	China	ASIA	66.78	66.78	46.58	46.58	-20.2	-0.360232	1	thin-35%
666	Mu	2013.4	t ha-1	pool	thin	sawlog	retain	5	0-5	Mix	C	<0	500-750	50	10-20	20	Mid	BC	C	TOC	SPOD	China	ASIA	66.78	66.78	38.17	38.17	-28.61	-0.559354	1	thin-50%
667	Mu	2013.4	t ha-1	pool	thin	sawlog	retain	5	0-5	Mix	C	<0	500-750	50	20-30	30	Mid	BC	C	TOC	SPOD	China	ASIA	33.25	33.25	46.15	46.15	12.9	0.327842	1	thin-25%
668	Mu	2013.4	t ha-1	pool	thin	sawlog	retain	5	0-5	Mix	C	<0	500-750	50	20-30	30	Mid	BC	C	TOC	SPOD	China	ASIA	33.25	33.25	7.87	7.87	-25.38	-1.441	1	thin-35%
669	Mu	2013.4	t ha-1	pool	thin	sawlog	retain	5	0-5	Mix	C	<0	500-750	50	20-30	30	Mid	BC	C	TOC	SPOD	China	ASIA	33.25	33.25	14.33	14.33	-18.92	-0.8417	1	thin-50%
670	Mu	2013.4	t ha-1	pool	thin	sawlog	retain	5	0-5	Mix	C	<0	500-750	50	30-40	40	Deep	BC	C	TOC	SPOD	China	ASIA	15.53	15.53	29.53	29.53	14	0.642633	1	thin-25%
671	Mu	2013.4	t ha-1	pool	thin	sawlog	retain	5	0-5	Mix	C	<0	500-750	50	30-40	40	Deep	BC	C	TOC	SPOD	China	ASIA	15.53	15.53	2.63	2.63	-12.9	-1.77579	1	thin-35%
672	Mu	2013.4	t ha-1	pool	thin	sawlog	retain	5	0-5	Mix	C	<0	500-750	50	30-40	40	Deep	BC	C	TOC	SPOD	China	ASIA	15.53	15.53	14.26	14.26	-1.27	-0.0853152	1	thin-50%
673	Mu	2013.4	t ha-1	pool	thin	sawlog	retain	5	0-5	Mix	C	<0	500-750	50	40-50	50	Deep	BC	C	TOC	SPOD	China	ASIA	12.73	12.73	29.03	29.03	16.3	0.824368	1	thin-25%
674	Mu	2013.4	t ha-1	pool	thin	sawlog	retain	5	0-5	Mix	C	<0	500-750	50	40-50	50	Deep	BC	C	TOC	SPOD	China	ASIA	12.73	12.73	2.54	2.54	-10.19	-1.6118	1	thin-35%
675	Mu	2013.4	t ha-1	pool	thin	sawlog	retain	5	0-5	Mix	C	<0	500-750	50	40-50	50	Deep	BC	C	TOC	SPOD	China	ASIA	12.73	12.73	11.46	11.46	-1.27	-0.105099	1	thin-50%
676	Chen	2013.5	t ha-1	pool	clearcut	sawlog	burn	2	0-5	Fir	C	16-20	1401-1800	100	O	0	O	O	F	CHN	ULT	China	ASIA	13.37	13.37	0.07	0.07	-13.3	-5.25227	1	Note: REF (natural) forest is broadleaf, clearcut to make fir plantation
677	Chen	2013.5	t ha-1	pool	clearcut	sawlog	burn	7	6-20	Fir	C	16-20	1401-1800	100	O	0	O	O	F	CHN	ULT	China	ASIA	13.37	13.37	2.08	2.08	-11.29	-1.86065	1
678	Chen	2013.5	t ha-1	pool	clearcut	sawlog	burn	16	6-20	Fir	C	16-20	1401-1800	100	O	0	O	O	F	CHN	ULT	China	ASIA	13.37	13.37	3.15	3.15	-10.22	-1.44561	1
679	Chen	2013.5	t ha-1	pool	clearcut	sawlog	burn	21	21-40	Fir	C	16-20	1401-1800	100	O	0	O	O	F	CHN	ULT	China	ASIA	13.37	13.37	3.34	3.34	-10.03	-1.38704	1
680	Chen	2013.5	t ha-1	pool	clearcut	sawlog	burn	40	21-40	Fir	C	16-20	1401-1800	100	O	0	O	O	F	CHN	ULT	China	ASIA	13.37	13.37	5.42	5.42	-7.95	-0.902918	1
681	Chen	2013.5	t ha-1	pool	clearcut	sawlog	burn	88	>40	Fir	C	16-20	1401-1800	100	O	0	O	O	F	CHN	ULT	China	ASIA	13.37	13.37	6.14	6.14	-7.23	-0.778189	1
682	Chen	2013.5	t ha-1	pool	clearcut	sawlog	burn	2	0-5	Fir	C	16-20	1401-1800	100	0-20	20	Top	A	F	CHN	ULT	China	ASIA	41.97	41.97	36.03	36.03	-5.94	-0.152603	1
683	Chen	2013.5	t ha-1	pool	clearcut	sawlog	burn	7	6-20	Fir	C	16-20	1401-1800	100	0-20	20	Top	A	F	CHN	ULT	China	ASIA	41.97	41.97	32.82	32.82	-9.15	-0.245917	1
684	Chen	2013.5	t ha-1	pool	clearcut	sawlog	burn	16	6-20	Fir	C	16-20	1401-1800	100	0-20	20	Top	A	F	CHN	ULT	China	ASIA	41.97	41.97	34.15	34.15	-7.82	-0.206192	1
685	Chen	2013.5	t ha-1	pool	clearcut	sawlog	burn	21	21-40	Fir	C	16-20	1401-1800	100	0-20	20	Top	A	F	CHN	ULT	China	ASIA	41.97	41.97	30.75	30.75	-11.22	-0.311065	1
686	Chen	2013.5	t ha-1	pool	clearcut	sawlog	burn	40	21-40	Fir	C	16-20	1401-1800	100	0-20	20	Top	A	F	CHN	ULT	China	ASIA	41.97	41.97	27.49	27.49	-14.48	-0.423133	1
687	Chen	2013.5	t ha-1	pool	clearcut	sawlog	burn	88	>40	Fir	C	16-20	1401-1800	100	0-20	20	Top	A	F	CHN	ULT	China	ASIA	41.97	41.97	35.96	35.96	-6.01	-0.154548	1
688	Chen	2013.5	t ha-1	pool	clearcut	sawlog	burn	2	0-5	Fir	C	16-20	1401-1800	100	20-40	40	Mid	BC	F	CHN	ULT	China	ASIA	23.56	23.56	21.77	21.77	-1.79	-0.0790175	1
689	Chen	2013.5	t ha-1	pool	clearcut	sawlog	burn	7	6-20	Fir	C	16-20	1401-1800	100	20-40	40	Mid	BC	F	CHN	ULT	China	ASIA	23.56	23.56	16.89	16.89	-6.67	-0.332829	1
690	Chen	2013.5	t ha-1	pool	clearcut	sawlog	burn	16	6-20	Fir	C	16-20	1401-1800	100	20-40	40	Mid	BC	F	CHN	ULT	China	ASIA	23.56	23.56	14.69	14.69	-8.87	-0.472383	1
691	Chen	2013.5	t ha-1	pool	clearcut	sawlog	burn	21	21-40	Fir	C	16-20	1401-1800	100	20-40	40	Mid	BC	F	CHN	ULT	China	ASIA	23.56	23.56	21.8	21.8	-1.76	-0.0776404	1
692	Chen	2013.5	t ha-1	pool	clearcut	sawlog	burn	40	21-40	Fir	C	16-20	1401-1800	100	20-40	40	Mid	BC	F	CHN	ULT	China	ASIA	23.56	23.56	19.55	19.55	-4.01	-0.186575	1
693	Chen	2013.5	t ha-1	pool	clearcut	sawlog	burn	88	>40	Fir	C	16-20	1401-1800	100	20-40	40	Mid	BC	F	CHN	ULT	China	ASIA	23.56	23.56	12.36	12.36	-11.2	-0.645085	1
694	Chen	2013.5	t ha-1	pool	clearcut	sawlog	burn	2	0-5	Fir	C	16-20	1401-1800	100	40-100	100	V_Deep	BC	F	CHN	ULT	China	ASIA	35.9	35.9	30.97	30.97	-4.93	-0.147718	1
695	Chen	2013.5	t ha-1	pool	clearcut	sawlog	burn	7	6-20	Fir	C	16-20	1401-1800	100	40-100	100	V_Deep	BC	F	CHN	ULT	China	ASIA	35.9	35.9	23.28	23.28	-12.62	-0.433143	1
696	Chen	2013.5	t ha-1	pool	clearcut	sawlog	burn	16	6-20	Fir	C	16-20	1401-1800	100	40-100	100	V_Deep	BC	F	CHN	ULT	China	ASIA	35.9	35.9	13.12	13.12	-22.78	-1.0066	1
697	Chen	2013.5	t ha-1	pool	clearcut	sawlog	burn	21	21-40	Fir	C	16-20	1401-1800	100	40-100	100	V_Deep	BC	F	CHN	ULT	China	ASIA	35.9	35.9	20.64	20.64	-15.26	-0.553506	1
698	Chen	2013.5	t ha-1	pool	clearcut	sawlog	burn	40	21-40	Fir	C	16-20	1401-1800	100	40-100	100	V_Deep	BC	F	CHN	ULT	China	ASIA	35.9	35.9	24.65	24.65	-11.25	-0.37596	1
699	Chen	2013.5	t ha-1	pool	clearcut	sawlog	burn	88	>40	Fir	C	16-20	1401-1800	100	40-100	100	V_Deep	BC	F	CHN	ULT	China	ASIA	35.9	35.9	24.02	24.02	-11.88	-0.40185	1
700	Kishchuk	2014.1	kg ha-1	pool	clearcut	sawlog		1	0-5	Mix	C	0-5		7	O	0	O	O	F	CHN	INCEP	N Alberta	NW NAM	37786	37.786	29476	29.476	-8.31	-0.248362	1
701	Kishchuk	2014.1	kg ha-1	pool	clearcut	sawlog		11	6-20	Mix	C	0-5		7	O	0	O	O	F	CHN	INCEP	N Alberta	NW NAM	38076	38.076	41340	41.34	3.264	0.0822464	1
702	Kishchuk	2014.1	kg ha-1	pool	clearcut	sawlog		1	0-5	Mix	C	0-5		7	0-7	7	Top	A	F	CHN	INCEP	N Alberta	NW NAM	26492	26.492	19641	19.641	-6.851	-0.299224	1
703	Kishchuk	2014.1	kg ha-1	pool	clearcut	sawlog		11	6-20	Mix	C	0-5		7	0-7	7	Top	A	F	CHN	INCEP	N Alberta	NW NAM	21061	21.061	17951	17.951	-3.11	-0.159777	1
704	Roaldson	2014.2	mg g-1	conc	thin	sawlog	retain	1	0-5	Pine	C		751-1000	20	0-20	20	Top	A	F	CHN	ALF	CA, USA	SW NAM	31.16	31.16	34.87	34.87	3.71	0.112492	1
705	Roaldson	2014.2	mg g-1	conc	thin	sawlog	remove	1	0-5	Pine	C		751-1000	20	0-20	20	Top	A	F	CHN	ALF	CA, USA	SW NAM	34.95	34.95	36.61	36.61	1.66	0.046403	1
706	Roaldson	2014.2	mg g-1	conc	thin	sawlog	burn	1	0-5	Pine	C		751-1000	20	0-20	20	Top	A	F	CHN	ALF	CA, USA	SW NAM	49.29	49.29	55.05	55.05	5.76	0.110521	1
707	Roaldson	2014.2	mg g-1	conc	thin	sawlog	burn	1	0-5	Pine	C		751-1000	20	0-20	20	Top	A	F	CHN	ALF	CA, USA	SW NAM	35.74	35.74	44.34	44.34	8.6	0.215617	1
708	Roaldson	2014.2	mg g-1	conc	thin	WTH	retain	1	0-5	Pine	C		751-1000	20	0-20	20	Top	A	F	CHN	ALF	CA, USA	SW NAM	34.17	34.17	41.92	41.92	7.75	0.204415	1
709	Roaldson	2014.2	mg g-1	conc	thin	WTH	remove	1	0-5	Pine	C		751-1000	20	0-20	20	Top	A	F	CHN	ALF	CA, USA	SW NAM	30.2	30.2	35.91	35.91	5.71	0.173174	1
710	Roaldson	2014.2	mg g-1	conc	thin	WTH	burn	1	0-5	Pine	C		751-1000	20	0-20	20	Top	A	F	CHN	ALF	CA, USA	SW NAM	38.99	38.99	42.69	42.69	3.7	0.0906595	1
711	Roaldson	2014.2	mg g-1	conc	thin	WTH	burn	1	0-5	Pine	C		751-1000	20	0-20	20	Top	A	F	CHN	ALF	CA, USA	SW NAM	65.69	65.69	60.85	60.85	-4.84	-0.0765349	1
712	Roaldson	2014.2	mg g-1	conc	thin	sawlog	retain	9	6-20	Pine	C		751-1000	20	0-20	20	Top	A	F	CHN	ALF	CA, USA	SW NAM	31.16	31.16	67.97	67.97	36.81	0.779931	1
713	Roaldson	2014.2	mg g-1	conc	thin	sawlog	remove	9	6-20	Pine	C		751-1000	20	0-20	20	Top	A	F	CHN	ALF	CA, USA	SW NAM	34.95	34.95	55.42	55.42	20.47	0.461022	1
714	Roaldson	2014.2	mg g-1	conc	thin	sawlog	burn	9	6-20	Pine	C		751-1000	20	0-20	20	Top	A	F	CHN	ALF	CA, USA	SW NAM	49.29	49.29	53.86	53.86	4.57	0.0886669	1
715	Roaldson	2014.2	mg g-1	conc	thin	sawlog	burn	9	6-20	Pine	C		751-1000	20	0-20	20	Top	A	F	CHN	ALF	CA, USA	SW NAM	35.74	35.74	58.04	58.04	22.3	0.484862	1
716	Roaldson	2014.2	mg g-1	conc	thin	WTH	retain	9	6-20	Pine	C		751-1000	20	0-20	20	Top	A	F	CHN	ALF	CA, USA	SW NAM	34.17	34.17	36.26	36.26	2.09	0.0593671	1
717	Roaldson	2014.2	mg g-1	conc	thin	WTH	remove	9	6-20	Pine	C		751-1000	20	0-20	20	Top	A	F	CHN	ALF	CA, USA	SW NAM	30.2	30.2	36.77	36.77	6.57	0.19684	1
718	Roaldson	2014.2	mg g-1	conc	thin	WTH	burn	9	6-20	Pine	C		751-1000	20	0-20	20	Top	A	F	CHN	ALF	CA, USA	SW NAM	38.99	38.99	48.62	48.62	9.63	0.22073	1
719	Roaldson	2014.2	mg g-1	conc	thin	WTH	burn	9	6-20	Pine	C		751-1000	20	0-20	20	Top	A	F	CHN	ALF	CA, USA	SW NAM	65.69	65.69	47.48	47.48	-18.21	-0.324638	1
720	Vario	2014.3	Mg ha-1	pool	clearcut	sawlog		5	0-5	Mix	H			60	0-60	60	Whole	ABC	C	CHN	SPOD	NH, USA	NE NAM	87.11	87.11	75.47	75.47	-11.64	-0.143436	1	also cut 120 & 55
721	Vario	2014.3	Mg ha-1	pool	clearcut	sawlog		12	6-20	Mix	H			60	0-60	60	Whole	ABC	C	CHN	SPOD	NH, USA	NE NAM	87.11	87.11	103.88	103.88	16.77	0.176065	1	suspect methodology, also cut 120
722	Vario	2014.3	Mg ha-1	pool	clearcut	sawlog		25	21-40	Mix	H			60	0-60	60	Whole	ABC	C	CHN	SPOD	NH, USA	NE NAM	87.11	87.11	71.74	71.74	-15.37	-0.194123	1	also cut 120
723	Vario	2014.3	Mg ha-1	pool	clearcut	sawlog		55	>40	Mix	H			60	0-60	60	Whole	ABC	C	CHN	SPOD	NH, USA	NE NAM	87.11	87.11	65.22	65.22	-21.89	-0.289406	1	also cut 120
724	Vario	2014.3	Mg ha-1	pool	clearcut	sawlog		75	>40	Mix	H			60	0-60	60	Whole	ABC	C	CHN	SPOD	NH, USA	NE NAM	87.11	87.11	65.22	65.22	-21.89	-0.289406	1	also cut 120
725	Vario	2014.3	Mg ha-1	pool	clearcut	sawlog		120	>40	Mix	H			60	0-60	60	Whole	ABC	C	CHN	SPOD	NH, USA	NE NAM	87.11	87.11	102.95	102.95	15.84	0.167072	1
726	Prest	2014.4	Mg ha-1	pool	clearcut	sawlog		35	21-40	Spruce	C	5-7.5	1001-1400	50	O	0	O	O	C	CHN	SPOD	Nova Scotia	NE NAM	17.34	17.34	25.05	25.05	7.71	0.367858	1	CTRL ste clearcut 110 years previous
727	Prest	2014.4	Mg ha-1	pool	clearcut	sawlog		35	21-40	Spruce	C	5-7.5	1001-1400	50	0-10	10	Top	A	C	CHN	SPOD	Nova Scotia	NE NAM	38.34	38.34	29.57	29.57	-8.77	-0.259733	1	CTRL ste clearcut 110 years previous
728	Prest	2014.4	Mg ha-1	pool	clearcut	sawlog		35	21-40	Spruce	C	5-7.5	1001-1400	50	10-20	20	Mid	A	C	CHN	SPOD	Nova Scotia	NE NAM	35.29	35.29	24.74	24.74	-10.55	-0.355178	1	CTRL ste clearcut 110 years previous
729	Prest	2014.4	Mg ha-1	pool	clearcut	sawlog		35	21-40	Spruce	C	5-7.5	1001-1400	50	20-35	35	Mid	BC	C	CHN	SPOD	Nova Scotia	NE NAM	47.12	47.12	40.98	40.98	-6.14	-0.139613	1	CTRL ste clearcut 110 years previous
730	Prest	2014.4	Mg ha-1	pool	clearcut	sawlog		35	21-40	Spruce	C	5-7.5	1001-1400	50	35-50	50	Deep	BC	C	CHN	SPOD	Nova Scotia	NE NAM	54.86	54.86	42.95	42.95	-11.91	-0.244748	1	CTRL ste clearcut 110 years previous
731	Johnson d	2014.5	Mg ha-1	pool	thin		retain	0	0-5	Mix	C	0-5	810	60	O	0	O	O	F	CHN	ALF	CA, USA	SW NAM	41	41	30	30	-11	-0.312375	1
732	Johnson d	2014.5	Mg ha-1	pool	thin		burn	1	0-5	Mix	C	0-5	810	60	O	0	O	O	F	CHN	ALF	CA, USA	SW NAM	41	41	33	33	-8	-0.217065	1
733	Johnson d	2014.5	Mg ha-1	pool	thin		retain	0	0-5	Mix	C	0-5	810	60	0-60	60	Whole	ABC	F	CHN	ALF	CA, USA	SW NAM	122	122	107	107	-15	-0.131192	1
734	Johnson d	2014.5	Mg ha-1	pool	thin		burn	1	0-5	Mix	C	0-5	810	60	0-60	60	Whole	ABC	F	CHN	ALF	CA, USA	SW NAM	122	122	134	134	12	0.0938188	1
735	Kurth	2014.6	Mg ha-1	pool	clearcut	sawlog		0	0-5	Aspen	H	0-5	500-750	30	O	0	O	O	F	CHN	ALF	MN, USA	NE NAM	30.8	30.8	33.1	33.1	2.3	0.0720186	1
736	Kurth	2014.6	Mg ha-1	pool	clearcut	sawlog		5	0-5	Aspen	H	0-5	500-750	30	O	0	O	O	F	CHN	ALF	MN, USA	NE NAM	30.8	30.8	39	39	8.2	0.236047	1
737	Kurth	2014.6	Mg ha-1	pool	clearcut	sawlog		10	6-20	Aspen	H	0-5	500-750	30	O	0	O	O	F	CHN	ALF	MN, USA	NE NAM	30.8	30.8	54.9	54.9	24.1	0.577999	1
738	Kurth	2014.6	Mg ha-1	pool	clearcut	sawlog		15	6-20	Aspen	H	0-5	500-750	30	O	0	O	O	F	CHN	ALF	MN, USA	NE NAM	30.8	30.8	30.5	30.5	-0.3	-0.00978801	1
739	Kurth	2014.6	Mg ha-1	pool	clearcut	WTH		0	0-5	Aspen	H	0-5	500-750	30	O	0	O	O	F	CHN	ALF	MN, USA	NE NAM	29.7	29.7	31.5	31.5	1.8	0.0588405	1
740	Kurth	2014.6	Mg ha-1	pool	clearcut	WTH		5	0-5	Aspen	H	0-5	500-750	30	O	0	O	O	F	CHN	ALF	MN, USA	NE NAM	29.7	29.7	23.7	23.7	-6	-0.225672	1
741	Kurth	2014.6	Mg ha-1	pool	clearcut	WTH		10	6-20	Aspen	H	0-5	500-750	30	O	0	O	O	F	CHN	ALF	MN, USA	NE NAM	29.7	29.7	36.2	36.2	6.5	0.197912	1
742	Kurth	2014.6	Mg ha-1	pool	clearcut	WTH		15	6-20	Aspen	H	0-5	500-750	30	O	0	O	O	F	CHN	ALF	MN, USA	NE NAM	29.7	29.7	21.1	21.1	-8.6	-0.341874	1
743	Kurth	2014.6	Mg ha-1	pool	clearcut	WTH	remove	0	0-5	Aspen	H	0-5	500-750	30	O	0	O	O	F	CHN	ALF	MN, USA	NE NAM	22.1	22.1	18.9	18.9	-3.2	-0.156416	1
744	Kurth	2014.6	Mg ha-1	pool	clearcut	WTH	remove	5	0-5	Aspen	H	0-5	500-750	30	O	0	O	O	F	CHN	ALF	MN, USA	NE NAM	22.1	22.1	18.5	18.5	-3.6	-0.177807	1
745	Kurth	2014.6	Mg ha-1	pool	clearcut	WTH	remove	10	6-20	Aspen	H	0-5	500-750	30	O	0	O	O	F	CHN	ALF	MN, USA	NE NAM	22.1	22.1	37.5	37.5	15.4	0.528763	1
746	Kurth	2014.6	Mg ha-1	pool	clearcut	WTH	remove	15	6-20	Aspen	H	0-5	500-750	30	O	0	O	O	F	CHN	ALF	MN, USA	NE NAM	22.1	22.1	16.6	16.6	-5.5	-0.286175	1
747	Kurth	2014.6	Mg ha-1	pool	clearcut	sawlog		0	0-5	Aspen	H	5-7.5	500-750	30	O	0	O	O	C	CHN	SPOD	MI, USA	NE NAM	6.4	6.4	16.8	16.8	10.4	0.965081	1
748	Kurth	2014.6	Mg ha-1	pool	clearcut	sawlog		5	0-5	Aspen	H	5-7.5	500-750	30	O	0	O	O	C	CHN	SPOD	MI, USA	NE NAM	6.4	6.4	9.4	9.4	3	0.384412	1
749	Kurth	2014.6	Mg ha-1	pool	clearcut	sawlog		10	6-20	Aspen	H	5-7.5	500-750	30	O	0	O	O	C	CHN	SPOD	MI, USA	NE NAM	6.4	6.4	8.7	8.7	2.3	0.307025	1
750	Kurth	2014.6	Mg ha-1	pool	clearcut	sawlog		15	6-20	Aspen	H	5-7.5	500-750	30	O	0	O	O	C	CHN	SPOD	MI, USA	NE NAM	6.4	6.4	10.8	10.8	4.4	0.523248	1
751	Kurth	2014.6	Mg ha-1	pool	clearcut	WTH		0	0-5	Aspen	H	5-7.5	500-750	30	O	0	O	O	C	CHN	SPOD	MI, USA	NE NAM	14.6	14.6	10.9	10.9	-3.7	-0.292259	1
752	Kurth	2014.6	Mg ha-1	pool	clearcut	WTH		5	0-5	Aspen	H	5-7.5	500-750	30	O	0	O	O	C	CHN	SPOD	MI, USA	NE NAM	14.6	14.6	9.4	9.4	-5.2	-0.440312	1
753	Kurth	2014.6	Mg ha-1	pool	clearcut	WTH		10	6-20	Aspen	H	5-7.5	500-750	30	O	0	O	O	C	CHN	SPOD	MI, USA	NE NAM	14.6	14.6	10.7	10.7	-3.9	-0.310778	1
754	Kurth	2014.6	Mg ha-1	pool	clearcut	WTH		15	6-20	Aspen	H	5-7.5	500-750	30	O	0	O	O	C	CHN	SPOD	MI, USA	NE NAM	14.6	14.6	11.9	11.9	-2.7	-0.204483	1
755	Kurth	2014.6	Mg ha-1	pool	clearcut	WTH	remove	0	0-5	Aspen	H	5-7.5	500-750	30	O	0	O	O	C	CHN	SPOD	MI, USA	NE NAM	8	8	6	6	-2	-0.287682	1
756	Kurth	2014.6	Mg ha-1	pool	clearcut	WTH	remove	5	0-5	Aspen	H	5-7.5	500-750	30	O	0	O	O	C	CHN	SPOD	MI, USA	NE NAM	8	8	2.2	2.2	-5.8	-1.29098	1
757	Kurth	2014.6	Mg ha-1	pool	clearcut	WTH	remove	10	6-20	Aspen	H	5-7.5	500-750	30	O	0	O	O	C	CHN	SPOD	MI, USA	NE NAM	8	8	4.8	4.8	-3.2	-0.510826	1
758	Kurth	2014.6	Mg ha-1	pool	clearcut	WTH	remove	15	6-20	Aspen	H	5-7.5	500-750	30	O	0	O	O	C	CHN	SPOD	MI, USA	NE NAM	8	8	4.8	4.8	-3.2	-0.510826	1
759	Kurth	2014.6	Mg ha-1	pool	clearcut	sawlog		0	0-5	Aspen	H	0-5	751-1000	30	O	0	O	O	F	CHN	ALF	MI, USA	NE NAM	17	17	23.2	23.2	6.2	0.310939	1
760	Kurth	2014.6	Mg ha-1	pool	clearcut	sawlog		5	0-5	Aspen	H	0-5	751-1000	30	O	0	O	O	F	CHN	ALF	MI, USA	NE NAM	17	17	26.3	26.3	9.3	0.436356	1
761	Kurth	2014.6	Mg ha-1	pool	clearcut	sawlog		10	6-20	Aspen	H	0-5	751-1000	30	O	0	O	O	F	CHN	ALF	MI, USA	NE NAM	17	17	20.5	20.5	3.5	0.187212	1
762	Kurth	2014.6	Mg ha-1	pool	clearcut	sawlog		15	6-20	Aspen	H	0-5	751-1000	30	O	0	O	O	F	CHN	ALF	MI, USA	NE NAM	17	17	14.3	14.3	-2.7	-0.172954	1
763	Kurth	2014.6	Mg ha-1	pool	clearcut	WTH		0	0-5	Aspen	H	0-5	751-1000	30	O	0	O	O	F	CHN	ALF	MI, USA	NE NAM	22.7	22.7	27.2	27.2	4.5	0.180852	1
764	Kurth	2014.6	Mg ha-1	pool	clearcut	WTH		5	0-5	Aspen	H	0-5	751-1000	30	O	0	O	O	F	CHN	ALF	MI, USA	NE NAM	22.7	22.7	30.8	30.8	8.1	0.30515	1
765	Kurth	2014.6	Mg ha-1	pool	clearcut	WTH		10	6-20	Aspen	H	0-5	751-1000	30	O	0	O	O	F	CHN	ALF	MI, USA	NE NAM	22.7	22.7	19.9	19.9	-2.8	-0.131645	1
766	Kurth	2014.6	Mg ha-1	pool	clearcut	WTH		15	6-20	Aspen	H	0-5	751-1000	30	O	0	O	O	F	CHN	ALF	MI, USA	NE NAM	22.7	22.7	10.2	10.2	-12.5	-0.799977	1
767	Kurth	2014.6	Mg ha-1	pool	clearcut	WTH	remove	0	0-5	Aspen	H	0-5	751-1000	30	O	0	O	O	F	CHN	ALF	MI, USA	NE NAM	20	20	8.3	8.3	-11.7	-0.879477	1
768	Kurth	2014.6	Mg ha-1	pool	clearcut	WTH	remove	5	0-5	Aspen	H	0-5	751-1000	30	O	0	O	O	F	CHN	ALF	MI, USA	NE NAM	20	20	15.8	15.8	-4.2	-0.235722	1
769	Kurth	2014.6	Mg ha-1	pool	clearcut	WTH	remove	10	6-20	Aspen	H	0-5	751-1000	30	O	0	O	O	F	CHN	ALF	MI, USA	NE NAM	20	20	11.9	11.9	-8.1	-0.519194	1
770	Kurth	2014.6	Mg ha-1	pool	clearcut	WTH	remove	15	6-20	Aspen	H	0-5	751-1000	30	O	0	O	O	F	CHN	ALF	MI, USA	NE NAM	20	20	5.3	5.3	-14.7	-1.32803	1
771	Kurth	2014.6	Mg ha-1	pool	clearcut	sawlog		0	0-5	Aspen	H	0-5	500-750	30	0-30	30	Top		F	CHN	ALF	MN, USA	NE NAM	27.6	27.6	29	29	1.4	0.0494801	1
772	Kurth	2014.6	Mg ha-1	pool	clearcut	sawlog		5	0-5	Aspen	H	0-5	500-750	30	0-30	30	Top		F	CHN	ALF	MN, USA	NE NAM	27.6	27.6	29.1	29.1	1.5	0.0529224	1
773	Kurth	2014.6	Mg ha-1	pool	clearcut	sawlog		10	6-20	Aspen	H	0-5	500-750	30	0-30	30	Top		F	CHN	ALF	MN, USA	NE NAM	27.6	27.6	31.4	31.4	3.8	0.128992	1
774	Kurth	2014.6	Mg ha-1	pool	clearcut	sawlog		15	6-20	Aspen	H	0-5	500-750	30	0-30	30	Top		F	CHN	ALF	MN, USA	NE NAM	27.6	27.6	26.9	26.9	-0.7	-0.0256895	1
775	Kurth	2014.6	Mg ha-1	pool	clearcut	WTH		0	0-5	Aspen	H	0-5	500-750	30	0-30	30	Top		F	CHN	ALF	MN, USA	NE NAM	25.7	25.7	29.3	29.3	3.6	0.131097	1
776	Kurth	2014.6	Mg ha-1	pool	clearcut	WTH		5	0-5	Aspen	H	0-5	500-750	30	0-30	30	Top		F	CHN	ALF	MN, USA	NE NAM	25.7	25.7	28.7	28.7	3	0.110406	1
777	Kurth	2014.6	Mg ha-1	pool	clearcut	WTH		10	6-20	Aspen	H	0-5	500-750	30	0-30	30	Top		F	CHN	ALF	MN, USA	NE NAM	25.7	25.7	28.9	28.9	3.2	0.117351	1
778	Kurth	2014.6	Mg ha-1	pool	clearcut	WTH		15	6-20	Aspen	H	0-5	500-750	30	0-30	30	Top		F	CHN	ALF	MN, USA	NE NAM	25.7	25.7	28.5	28.5	2.8	0.103413	1
779	Kurth	2014.6	Mg ha-1	pool	clearcut	WTH	remove	0	0-5	Aspen	H	0-5	500-750	30	0-30	30	Top		F	CHN	ALF	MN, USA	NE NAM	24	24	26.2	26.2	2.2	0.0877056	1
780	Kurth	2014.6	Mg ha-1	pool	clearcut	WTH	remove	5	0-5	Aspen	H	0-5	500-750	30	0-30	30	Top		F	CHN	ALF	MN, USA	NE NAM	24	24	29.9	29.9	5.9	0.219805	1
781	Kurth	2014.6	Mg ha-1	pool	clearcut	WTH	remove	10	6-20	Aspen	H	0-5	500-750	30	0-30	30	Top		F	CHN	ALF	MN, USA	NE NAM	24	24	30.1	30.1	6.1	0.226471	1
782	Kurth	2014.6	Mg ha-1	pool	clearcut	WTH	remove	15	6-20	Aspen	H	0-5	500-750	30	0-30	30	Top		F	CHN	ALF	MN, USA	NE NAM	24	24	24.9	24.9	0.9	0.036814	1
783	Kurth	2014.6	Mg ha-1	pool	clearcut	sawlog		0	0-5	Aspen	H	5-7.5	500-750	30	0-30	30	Top		C	CHN	SPOD	MI, USA	NE NAM	29.1	29.1	30	30	0.9	0.0304592	1
784	Kurth	2014.6	Mg ha-1	pool	clearcut	sawlog		5	0-5	Aspen	H	5-7.5	500-750	30	0-30	30	Top		C	CHN	SPOD	MI, USA	NE NAM	29.1	29.1	31.4	31.4	2.3	0.0760697	1
785	Kurth	2014.6	Mg ha-1	pool	clearcut	sawlog		10	6-20	Aspen	H	5-7.5	500-750	30	0-30	30	Top		C	CHN	SPOD	MI, USA	NE NAM	29.1	29.1	29.7	29.7	0.6	0.0204089	1
786	Kurth	2014.6	Mg ha-1	pool	clearcut	sawlog		15	6-20	Aspen	H	5-7.5	500-750	30	0-30	30	Top		C	CHN	SPOD	MI, USA	NE NAM	29.1	29.1	31.2	31.2	2.1	0.0696799	1
787	Kurth	2014.6	Mg ha-1	pool	clearcut	WTH		0	0-5	Aspen	H	5-7.5	500-750	30	0-30	30	Top		C	CHN	SPOD	MI, USA	NE NAM	31.1	31.1	29	29	-2.1	-0.069912	1
788	Kurth	2014.6	Mg ha-1	pool	clearcut	WTH		5	0-5	Aspen	H	5-7.5	500-750	30	0-30	30	Top		C	CHN	SPOD	MI, USA	NE NAM	31.1	31.1	33	33	1.9	0.0592997	1
789	Kurth	2014.6	Mg ha-1	pool	clearcut	WTH		10	6-20	Aspen	H	5-7.5	500-750	30	0-30	30	Top		C	CHN	SPOD	MI, USA	NE NAM	31.1	31.1	31.3	31.3	0.2	0.00641028	1
790	Kurth	2014.6	Mg ha-1	pool	clearcut	WTH		15	6-20	Aspen	H	5-7.5	500-750	30	0-30	30	Top		C	CHN	SPOD	MI, USA	NE NAM	31.1	31.1	33.5	33.5	2.4	0.0743376	1
791	Kurth	2014.6	Mg ha-1	pool	clearcut	WTH	remove	0	0-5	Aspen	H	5-7.5	500-750	30	0-30	30	Top		C	CHN	SPOD	MI, USA	NE NAM	31.4	31.4	26.9	26.9	-4.5	-0.154682	1
792	Kurth	2014.6	Mg ha-1	pool	clearcut	WTH	remove	5	0-5	Aspen	H	5-7.5	500-750	30	0-30	30	Top		C	CHN	SPOD	MI, USA	NE NAM	31.4	31.4	31.2	31.2	-0.2	-0.0063898	1
793	Kurth	2014.6	Mg ha-1	pool	clearcut	WTH	remove	10	6-20	Aspen	H	5-7.5	500-750	30	0-30	30	Top		C	CHN	SPOD	MI, USA	NE NAM	31.4	31.4	31.4	31.4	0	0	1
794	Kurth	2014.6	Mg ha-1	pool	clearcut	WTH	remove	15	6-20	Aspen	H	5-7.5	500-750	30	0-30	30	Top		C	CHN	SPOD	MI, USA	NE NAM	31.4	31.4	31.7	31.7	0.3	0.00950879	1
795	Kurth	2014.6	Mg ha-1	pool	clearcut	sawlog		0	0-5	Aspen	H	0-5	751-1000	30	0-30	30	Top		F	CHN	ALF	MI, USA	NE NAM	37.4	37.4	37.6	37.6	0.2	0.00533335	1
796	Kurth	2014.6	Mg ha-1	pool	clearcut	sawlog		5	0-5	Aspen	H	0-5	751-1000	30	0-30	30	Top		F	CHN	ALF	MI, USA	NE NAM	37.4	37.4	43.4	43.4	6	0.148789	1
797	Kurth	2014.6	Mg ha-1	pool	clearcut	sawlog		10	6-20	Aspen	H	0-5	751-1000	30	0-30	30	Top		F	CHN	ALF	MI, USA	NE NAM	37.4	37.4	46.1	46.1	8.7	0.209142	1
798	Kurth	2014.6	Mg ha-1	pool	clearcut	sawlog		15	6-20	Aspen	H	0-5	751-1000	30	0-30	30	Top		F	CHN	ALF	MI, USA	NE NAM	37.4	37.4	62.1	62.1	24.7	0.507075	1
799	Kurth	2014.6	Mg ha-1	pool	clearcut	WTH		0	0-5	Aspen	H	0-5	751-1000	30	0-30	30	Top		F	CHN	ALF	MI, USA	NE NAM	41.9	41.9	41.8	41.8	-0.1	-0.00238949	1
800	Kurth	2014.6	Mg ha-1	pool	clearcut	WTH		5	0-5	Aspen	H	0-5	751-1000	30	0-30	30	Top		F	CHN	ALF	MI, USA	NE NAM	41.9	41.9	43.5	43.5	1.6	0.0374751	1
801	Kurth	2014.6	Mg ha-1	pool	clearcut	WTH		10	6-20	Aspen	H	0-5	751-1000	30	0-30	30	Top		F	CHN	ALF	MI, USA	NE NAM	41.9	41.9	50.2	50.2	8.3	0.180729	1
802	Kurth	2014.6	Mg ha-1	pool	clearcut	WTH		15	6-20	Aspen	H	0-5	751-1000	30	0-30	30	Top		F	CHN	ALF	MI, USA	NE NAM	41.9	41.9	70	70	28.1	0.513209	1
803	Kurth	2014.6	Mg ha-1	pool	clearcut	WTH	remove	0	0-5	Aspen	H	0-5	751-1000	30	0-30	30	Top		F	CHN	ALF	MI, USA	NE NAM	46.5	46.5	40.5	40.5	-6	-0.13815	1
804	Kurth	2014.6	Mg ha-1	pool	clearcut	WTH	remove	5	0-5	Aspen	H	0-5	751-1000	30	0-30	30	Top		F	CHN	ALF	MI, USA	NE NAM	46.5	46.5	42.8	42.8	-3.7	-0.0829142	1
805	Kurth	2014.6	Mg ha-1	pool	clearcut	WTH	remove	10	6-20	Aspen	H	0-5	751-1000	30	0-30	30	Top		F	CHN	ALF	MI, USA	NE NAM	46.5	46.5	51.9	51.9	5.4	0.109866	1
806	Kurth	2014.6	Mg ha-1	pool	clearcut	WTH	remove	15	6-20	Aspen	H	0-5	751-1000	30	0-30	30	Top		F	CHN	ALF	MI, USA	NE NAM	46.5	46.5	56.4	56.4	9.9	0.193017	1
807	Jang	2015.1	Mg ha-1	pool	clearcut	sawlog	remove	38	21-40	Larch	C	0-5	1001-1400	30	O	0	O	O	O	CHN	ALF	MT, USA	NW NAM	135	135	167	167	32	0.212719	1
808	Jang	2015.1	Mg ha-1	pool	clearcut	sawlog	burn	38	21-40	Larch	C	0-5	1001-1400	30	O	0	O	O	O	CHN	ALF	MT, USA	NW NAM	135	135	70	70	-65	-0.65678	1
809	Jang	2015.1	Mg ha-1	pool	thin	sawlog	remove	38	21-40	Larch	C	0-5	1001-1400	30	O	0	O	O	O	CHN	ALF	MT, USA	NW NAM	135	135	54	54	-81	-0.916291	1
810	Jang	2015.1	Mg ha-1	pool	thin	sawlog	burn	38	21-40	Larch	C	0-5	1001-1400	30	O	0	O	O	O	CHN	ALF	MT, USA	NW NAM	135	135	69	69	-66	-0.671168	1
811	Jang	2015.1	Mg ha-1	pool	clearcut	sawlog	remove	38	21-40	Larch	C	0-5	1001-1400	30	0-30	30	Top	A	C	CHN	ALF	MT, USA	NW NAM	46	46	48	48	2	0.0425596	1
812	Jang	2015.1	Mg ha-1	pool	clearcut	sawlog	burn	38	21-40	Larch	C	0-5	1001-1400	30	0-30	30	Top	A	C	CHN	ALF	MT, USA	NW NAM	46	46	27	27	-19	-0.532805	1
813	Jang	2015.1	Mg ha-1	pool	thin	sawlog	remove	38	21-40	Larch	C	0-5	1001-1400	30	0-30	30	Top	A	C	CHN	ALF	MT, USA	NW NAM	46	46	43	43	-3	-0.0674413	1
814	Jang	2015.1	Mg ha-1	pool	thin	sawlog	burn	38	21-40	Larch	C	0-5	1001-1400	30	0-30	30	Top	A	C	CHN	ALF	MT, USA	NW NAM	46	46	32	32	-14	-0.362905	1
815	Christophel b	2015.2	Mg ha-1	pool	clearcut	sawlog	remove	34	21-40	Mix	C	0-5	>1800	30	O	0	O	O	F	CHN	MOLL	Germany	EUR	13.3	13.3	4.4	4.4	-8.9	-1.10616	1
816	Christophel b	2015.2	Mg ha-1	pool	thin	sawlog	remove	34	21-40	Mix	C	0-5	>1800	30	O	0	O	O	F	CHN	MOLL	Germany	EUR	13.3	13.3	4	4	-9.3	-1.20147	1	heavy = 50%
817	Christophel b	2015.2	Mg ha-1	pool	thin	sawlog	remove	34	21-40	Mix	C	0-5	>1800	30	O	0	O	O	F	CHN	MOLL	Germany	EUR	13.3	13.3	5.2	5.2	-8.1	-0.939105	1	light = 30%
818	Christophel b	2015.2	Mg ha-1	pool	thin	sawlog	remove	34	21-40	Mix	C	0-5	>1800	30	O	0	O	O	F	CHN	MOLL	Germany	EUR	2.6	2.6	1.5	1.5	-1.1	-0.550046	1	heavy = 50%
819	Christophel b	2015.2	Mg ha-1	pool	thin	sawlog	remove	31	21-40	Mix	C	0-5	>1800	30	O	0	O	O	F	CHN	MOLL	Germany	EUR	6.4	6.4	4.7	4.7	-1.7	-0.308735	1	heavy = 50%
820	Christophel b	2015.2	Mg ha-1	pool	thin	sawlog	remove	31	21-40	Mix	C	0-5	>1800	30	O	0	O	O	F	CHN	MOLL	Germany	EUR	3.2	3.2	3.9	3.9	0.7	0.197826	1	heavy = 50%
821	Christophel b	2015.2	Mg ha-1	pool	clearcut	sawlog	remove	34	21-40	Mix	C	0-5	>1800	30	0-10	10	Top	A	F	CHN	MOLL	Germany	EUR	28.9	28.9	30.3	30.3	1.4	0.0473061	1
822	Christophel b	2015.2	Mg ha-1	pool	thin	sawlog	remove	34	21-40	Mix	C	0-5	>1800	30	0-10	10	Top	A	F	CHN	MOLL	Germany	EUR	28.9	28.9	30.2	30.2	1.3	0.0440003	1	heavy = 50%
823	Christophel b	2015.2	Mg ha-1	pool	thin	sawlog	remove	34	21-40	Mix	C	0-5	>1800	30	0-10	10	Top	A	F	CHN	MOLL	Germany	EUR	28.9	28.9	28.5	28.5	-0.4	-0.0139375	1	light = 30%
824	Christophel b	2015.2	Mg ha-1	pool	thin	sawlog	remove	34	21-40	Mix	C	0-5	>1800	30	0-10	10	Top	A	F	CHN	MOLL	Germany	EUR	35.2	35.2	22	22	-13.2	-0.470004	1	heavy = 50%
825	Christophel b	2015.2	Mg ha-1	pool	thin	sawlog	remove	31	21-40	Mix	C	0-5	>1800	30	0-10	10	Top	A	F	CHN	MOLL	Germany	EUR	14.6	14.6	14.1	14.1	-0.5	-0.0348467	1	heavy = 50%
826	Christophel b	2015.2	Mg ha-1	pool	thin	sawlog	remove	31	21-40	Mix	C	0-5	>1800	30	0-10	10	Top	A	F	CHN	MOLL	Germany	EUR	20.9	20.9	15	15	-5.9	-0.331699	1	heavy = 50%
827	Christophel b	2015.2	Mg ha-1	pool	clearcut	sawlog	remove	34	21-40	Mix	C	0-5	>1800	30	0-30	30	Mid	BC	F	CHN	MOLL	Germany	EUR	54.6	54.6	60.5	60.5	5.9	0.102609	1
828	Christophel b	2015.2	Mg ha-1	pool	thin	sawlog	remove	34	21-40	Mix	C	0-5	>1800	30	0-30	30	Mid	BC	F	CHN	MOLL	Germany	EUR	54.6	54.6	57.8	57.8	3.2	0.0569549	1	heavy = 50%
829	Christophel b	2015.2	Mg ha-1	pool	thin	sawlog	remove	34	21-40	Mix	C	0-5	>1800	30	0-30	30	Mid	BC	F	CHN	MOLL	Germany	EUR	54.6	54.6	49.4	49.4	-5.2	-0.100083	1	light = 30%
830	Christophel b	2015.2	Mg ha-1	pool	thin	sawlog	remove	34	21-40	Mix	C	0-5	>1800	30	0-30	30	Mid	BC	F	CHN	MOLL	Germany	EUR	70.9	70.9	56.7	56.7	-14.2	-0.223496	1	heavy = 50%
831	Christophel b	2015.2	Mg ha-1	pool	thin	sawlog	remove	31	21-40	Mix	C	0-5	>1800	30	0-30	30	Mid	BC	F	CHN	MOLL	Germany	EUR	44.9	44.9	42.8	42.8	-2.1	-0.0478997	1	heavy = 50%
832	Christophel b	2015.2	Mg ha-1	pool	thin	sawlog	remove	31	21-40	Mix	C	0-5	>1800	30	0-30	30	Mid	BC	F	CHN	MOLL	Germany	EUR	66	66	41.8	41.8	-24.2	-0.456758	1	heavy = 50%
833	Strukelj	2015.3	Mg ha-1	pool	clearcut	sawlog		1	0-5	Aspen	H	0-5	751-1000	10	O	0	O	O	F	W-B	ALF	N Quebec	NE NAM	18.03	18.03	25.36	25.36	7.33	0.341136	1
834	Strukelj	2015.3	Mg ha-1	pool	thin	sawlog		1	0-5	Aspen	H	0-5	751-1000	10	O	0	O	O	F	W-B	ALF	N Quebec	NE NAM	18.03	18.03	20.18	20.18	2.15	0.112655	1	heavy = 2/3
835	Strukelj	2015.3	Mg ha-1	pool	thin	sawlog		1	0-5	Aspen	H	0-5	751-1000	10	O	0	O	O	F	W-B	ALF	N Quebec	NE NAM	18.03	18.03	21.2	21.2	3.17	0.161964	1	light = 1/3
836	Strukelj	2015.3	Mg ha-1	pool	clearcut	sawlog		9	6-20	Aspen	H	0-5	751-1000	10	O	0	O	O	F	W-B	ALF	N Quebec	NE NAM	19.23	19.23	24.83	24.83	5.6	0.255581	1
837	Strukelj	2015.3	Mg ha-1	pool	thin	sawlog		9	6-20	Aspen	H	0-5	751-1000	10	O	0	O	O	F	W-B	ALF	N Quebec	NE NAM	19.23	19.23	21.29	21.29	2.06	0.101766	1	heavy = 2/3
838	Strukelj	2015.3	Mg ha-1	pool	thin	sawlog		9	6-20	Aspen	H	0-5	751-1000	10	O	0	O	O	F	W-B	ALF	N Quebec	NE NAM	19.23	19.23	22.54	22.54	3.31	0.15882	1	light = 1/3
839	Strukelj	2015.3	Mg ha-1	pool	clearcut	sawlog		1	0-5	Aspen	H	0-5	751-1000	10	0-10	10	Top	A	F	W-B	ALF	N Quebec	NE NAM	20.39	20.39	23.06	23.06	2.67	0.123055	1
840	Strukelj	2015.3	Mg ha-1	pool	thin	sawlog		1	0-5	Aspen	H	0-5	751-1000	10	0-10	10	Top	A	F	W-B	ALF	N Quebec	NE NAM	20.39	20.39	20.29	20.29	-0.1	-0.00491643	1	heavy = 2/3
841	Strukelj	2015.3	Mg ha-1	pool	thin	sawlog		1	0-5	Aspen	H	0-5	751-1000	10	0-10	10	Top	A	F	W-B	ALF	N Quebec	NE NAM	20.39	20.39	23.35	23.35	2.96	0.135552	1	light = 1/3
842	Strukelj	2015.3	Mg ha-1	pool	clearcut	sawlog		9	6-20	Aspen	H	0-5	751-1000	10	0-10	10	Top	A	F	W-B	ALF	N Quebec	NE NAM	23.14	23.14	29.46	29.46	6.32	0.241471	1
843	Strukelj	2015.3	Mg ha-1	pool	thin	sawlog		9	6-20	Aspen	H	0-5	751-1000	10	0-10	10	Top	A	F	W-B	ALF	N Quebec	NE NAM	23.14	23.14	20.82	20.82	-2.32	-0.105649	1	heavy = 2/3
844	Strukelj	2015.3	Mg ha-1	pool	thin	sawlog		9	6-20	Aspen	H	0-5	751-1000	10	0-10	10	Top	A	F	W-B	ALF	N Quebec	NE NAM	23.14	23.14	21.22	21.22	-1.92	-0.0866186	1	light = 1/3
845	Moreno-Fernandez	2015.4	Mg ha-1	pool	thin	sawlog	intensive	18	6-20	Scots Pine	C	7.6-10	500-750	50	O	0	O	O	C	TOC		Spain	EUR	15.24	15.24	12.86	12.86	-2.38	-0.169802	1	Navafria site: 100 yr rotation, 20 yr regeneration w/ soil tilling
846	Moreno-Fernandez	2015.4	Mg ha-1	pool	thin	sawlog	intensive	36	21-40	Scots Pine	C	7.6-10	500-750	50	O	0	O	O	C	TOC		Spain	EUR	15.24	15.24	16.19	16.19	0.95	0.0604702	1	Navafria site: 100 yr rotation, 20 yr regeneration w/ soil tilling
847	Moreno-Fernandez	2015.4	Mg ha-1	pool	thin	sawlog	intensive	73	>40	Scots Pine	C	7.6-10	500-750	50	O	0	O	O	C	TOC		Spain	EUR	15.24	15.24	16.91	16.91	1.67	0.103982	1	Navafria site: 100 yr rotation, 20 yr regeneration w/ soil tilling
848	Moreno-Fernandez	2015.4	Mg ha-1	pool	thin	sawlog	intensive	102	>40	Scots Pine	C	7.6-10	500-750	50	O	0	O	O	C	TOC		Spain	EUR	15.24	15.24	12.86	12.86	-2.38	-0.169802	1	Navafria site: 100 yr rotation, 20 yr regeneration w/ soil tilling
849	Moreno-Fernandez	2015.4	Mg ha-1	pool	thin	sawlog		27	21-40	Scots Pine	C	7.6-10	500-750	50	O	0	O	O	C	TOC		Spain	EUR	7.62	7.62	7.14	7.14	-0.48	-0.0650636	1	Valsain site: 120 yr rotation, 40 year regeneration, thining less than Navafria
850	Moreno-Fernandez	2015.4	Mg ha-1	pool	thin	sawlog		40	21-40	Scots Pine	C	7.6-10	500-750	50	O	0	O	O	C	TOC		Spain	EUR	7.62	7.62	8.81	8.81	1.19	0.145111	1	Valsain site: 120 yr rotation, 40 year regeneration, thining less than Navafria
851	Moreno-Fernandez	2015.4	Mg ha-1	pool	thin	sawlog		57	>40	Scots Pine	C	7.6-10	500-750	50	O	0	O	O	C	TOC		Spain	EUR	7.62	7.62	14.29	14.29	6.67	0.628784	1	Valsain site: 120 yr rotation, 40 year regeneration, thining less than Navafria
852	Moreno-Fernandez	2015.4	Mg ha-1	pool	thin	sawlog		83	>40	Scots Pine	C	7.6-10	500-750	50	O	0	O	O	C	TOC		Spain	EUR	7.62	7.62	12.14	12.14	4.52	0.465729	1	Valsain site: 120 yr rotation, 40 year regeneration, thining less than Navafria
853	Moreno-Fernandez	2015.4	Mg ha-1	pool	thin	sawlog		104	>40	Scots Pine	C	7.6-10	500-750	50	O	0	O	O	C	TOC		Spain	EUR	7.62	7.62	8.57	8.57	0.95	0.117491	1	Valsain site: 120 yr rotation, 40 year regeneration, thining less than Navafria
854	Moreno-Fernandez	2015.4	Mg ha-1	pool	thin	sawlog	intensive	18	6-20	Scots Pine	C	7.6-10	500-750	50	0-10	10	Top	A	C	TOC		Spain	EUR	25.48	25.48	23.81	23.81	-1.67	-0.0677882	1	Navafria site: 100 yr rotation, 20 yr regeneration w/ soil tilling
855	Moreno-Fernandez	2015.4	Mg ha-1	pool	thin	sawlog	intensive	36	21-40	Scots Pine	C	7.6-10	500-750	50	0-10	10	Top	A	C	TOC		Spain	EUR	25.48	25.48	24.05	24.05	-1.43	-0.0577588	1	Navafria site: 100 yr rotation, 20 yr regeneration w/ soil tilling
856	Moreno-Fernandez	2015.4	Mg ha-1	pool	thin	sawlog	intensive	73	>40	Scots Pine	C	7.6-10	500-750	50	0-10	10	Top	A	C	TOC		Spain	EUR	25.48	25.48	27.62	27.62	2.14	0.0806463	1	Navafria site: 100 yr rotation, 20 yr regeneration w/ soil tilling
857	Moreno-Fernandez	2015.4	Mg ha-1	pool	thin	sawlog	intensive	102	>40	Scots Pine	C	7.6-10	500-750	50	0-10	10	Top	A	C	TOC		Spain	EUR	25.48	25.48	28.1	28.1	2.62	0.0978757	1	Navafria site: 100 yr rotation, 20 yr regeneration w/ soil tilling
858	Moreno-Fernandez	2015.4	Mg ha-1	pool	thin	sawlog		27	21-40	Scots Pine	C	7.6-10	500-750	50	0-10	10	Top	A	C	TOC		Spain	EUR	46.91	46.91	43.33	43.33	-3.58	-0.0793856	1	Valsain site: 120 yr rotation, 40 year regeneration, thining less than Navafria
859	Moreno-Fernandez	2015.4	Mg ha-1	pool	thin	sawlog		40	21-40	Scots Pine	C	7.6-10	500-750	50	0-10	10	Top	A	C	TOC		Spain	EUR	46.91	46.91	42.86	42.86	-4.05	-0.0902919	1	Valsain site: 120 yr rotation, 40 year regeneration, thining less than Navafria
860	Moreno-Fernandez	2015.4	Mg ha-1	pool	thin	sawlog		57	>40	Scots Pine	C	7.6-10	500-750	50	0-10	10	Top	A	C	TOC		Spain	EUR	46.91	46.91	28.1	28.1	-18.81	-0.512461	1	Valsain site: 120 yr rotation, 40 year regeneration, thining less than Navafria
861	Moreno-Fernandez	2015.4	Mg ha-1	pool	thin	sawlog		83	>40	Scots Pine	C	7.6-10	500-750	50	0-10	10	Top	A	C	TOC		Spain	EUR	46.91	46.91	38.1	38.1	-8.81	-0.208017	1	Valsain site: 120 yr rotation, 40 year regeneration, thining less than Navafria
862	Moreno-Fernandez	2015.4	Mg ha-1	pool	thin	sawlog		104	>40	Scots Pine	C	7.6-10	500-750	50	0-10	10	Top	A	C	TOC		Spain	EUR	46.91	46.91	44.29	44.29	-2.62	-0.057472	1	Valsain site: 120 yr rotation, 40 year regeneration, thining less than Navafria
863	Moreno-Fernandez	2015.4	Mg ha-1	pool	thin	sawlog	intensive	18	6-20	Scots Pine	C	7.6-10	500-750	50	10-20	20	Mid	A	C	TOC		Spain	EUR	27.85	27.85	23.33	23.33	-4.52	-0.177093	1	Navafria site: 100 yr rotation, 20 yr regeneration w/ soil tilling
864	Moreno-Fernandez	2015.4	Mg ha-1	pool	thin	sawlog	intensive	36	21-40	Scots Pine	C	7.6-10	500-750	50	10-20	20	Mid	A	C	TOC		Spain	EUR	27.85	27.85	22.86	22.86	-4.99	-0.197444	1	Navafria site: 100 yr rotation, 20 yr regeneration w/ soil tilling
865	Moreno-Fernandez	2015.4	Mg ha-1	pool	thin	sawlog	intensive	73	>40	Scots Pine	C	7.6-10	500-750	50	10-20	20	Mid	A	C	TOC		Spain	EUR	27.85	27.85	22.62	22.62	-5.23	-0.207998	1	Navafria site: 100 yr rotation, 20 yr regeneration w/ soil tilling
866	Moreno-Fernandez	2015.4	Mg ha-1	pool	thin	sawlog	intensive	102	>40	Scots Pine	C	7.6-10	500-750	50	10-20	20	Mid	A	C	TOC		Spain	EUR	27.85	27.85	29.28	29.28	1.43	0.0500717	1	Navafria site: 100 yr rotation, 20 yr regeneration w/ soil tilling
867	Moreno-Fernandez	2015.4	Mg ha-1	pool	thin	sawlog		27	21-40	Scots Pine	C	7.6-10	500-750	50	10-20	20	Mid	A	C	TOC		Spain	EUR	35.47	35.47	36.19	36.19	0.72	0.0200956	1	Valsain site: 120 yr rotation, 40 year regeneration, thining less than Navafria
868	Moreno-Fernandez	2015.4	Mg ha-1	pool	thin	sawlog		40	21-40	Scots Pine	C	7.6-10	500-750	50	10-20	20	Mid	A	C	TOC		Spain	EUR	35.47	35.47	35	35	-0.47	-0.0133392	1	Valsain site: 120 yr rotation, 40 year regeneration, thining less than Navafria
869	Moreno-Fernandez	2015.4	Mg ha-1	pool	thin	sawlog		57	>40	Scots Pine	C	7.6-10	500-750	50	10-20	20	Mid	A	C	TOC		Spain	EUR	35.47	35.47	29.04	29.04	-6.43	-0.200013	1	Valsain site: 120 yr rotation, 40 year regeneration, thining less than Navafria
870	Moreno-Fernandez	2015.4	Mg ha-1	pool	thin	sawlog		83	>40	Scots Pine	C	7.6-10	500-750	50	10-20	20	Mid	A	C	TOC		Spain	EUR	35.47	35.47	32.85	32.85	-2.62	-0.0767355	1	Valsain site: 120 yr rotation, 40 year regeneration, thining less than Navafria
871	Moreno-Fernandez	2015.4	Mg ha-1	pool	thin	sawlog		104	>40	Scots Pine	C	7.6-10	500-750	50	10-20	20	Mid	A	C	TOC		Spain	EUR	35.47	35.47	36.19	36.19	0.72	0.0200956	1	Valsain site: 120 yr rotation, 40 year regeneration, thining less than Navafria
872	Moreno-Fernandez	2015.4	Mg ha-1	pool	thin	sawlog	intensive	18	6-20	Scots Pine	C	7.6-10	500-750	50	20-30	30	Mid	BC	C	TOC		Spain	EUR	25.72	25.72	27.62	27.62	1.9	0.0712712	1	Navafria site: 100 yr rotation, 20 yr regeneration w/ soil tilling
873	Moreno-Fernandez	2015.4	Mg ha-1	pool	thin	sawlog	intensive	36	21-40	Scots Pine	C	7.6-10	500-750	50	20-30	30	Mid	BC	C	TOC		Spain	EUR	25.72	25.72	16.19	16.19	-9.53	-0.462875	1	Navafria site: 100 yr rotation, 20 yr regeneration w/ soil tilling
874	Moreno-Fernandez	2015.4	Mg ha-1	pool	thin	sawlog	intensive	73	>40	Scots Pine	C	7.6-10	500-750	50	20-30	30	Mid	BC	C	TOC		Spain	EUR	25.72	25.72	14.05	14.05	-11.67	-0.604647	1	Navafria site: 100 yr rotation, 20 yr regeneration w/ soil tilling
875	Moreno-Fernandez	2015.4	Mg ha-1	pool	thin	sawlog	intensive	102	>40	Scots Pine	C	7.6-10	500-750	50	20-30	30	Mid	BC	C	TOC		Spain	EUR	25.72	25.72	24.05	24.05	-1.67	-0.0671339	1	Navafria site: 100 yr rotation, 20 yr regeneration w/ soil tilling
876	Moreno-Fernandez	2015.4	Mg ha-1	pool	thin	sawlog		27	21-40	Scots Pine	C	7.6-10	500-750	50	20-30	30	Mid	BC	C	TOC		Spain	EUR	23.57	23.57	24.05	24.05	0.48	0.0201603	1	Valsain site: 120 yr rotation, 40 year regeneration, thining less than Navafria
877	Moreno-Fernandez	2015.4	Mg ha-1	pool	thin	sawlog		40	21-40	Scots Pine	C	7.6-10	500-750	50	20-30	30	Mid	BC	C	TOC		Spain	EUR	23.57	23.57	26.9	26.9	3.33	0.132152	1	Valsain site: 120 yr rotation, 40 year regeneration, thining less than Navafria
878	Moreno-Fernandez	2015.4	Mg ha-1	pool	thin	sawlog		57	>40	Scots Pine	C	7.6-10	500-750	50	20-30	30	Mid	BC	C	TOC		Spain	EUR	23.57	23.57	14.53	14.53	-9.04	-0.483759	1	Valsain site: 120 yr rotation, 40 year regeneration, thining less than Navafria
879	Moreno-Fernandez	2015.4	Mg ha-1	pool	thin	sawlog		83	>40	Scots Pine	C	7.6-10	500-750	50	20-30	30	Mid	BC	C	TOC		Spain	EUR	23.57	23.57	23.34	23.34	-0.23	-0.00980609	1	Valsain site: 120 yr rotation, 40 year regeneration, thining less than Navafria
880	Moreno-Fernandez	2015.4	Mg ha-1	pool	thin	sawlog		104	>40	Scots Pine	C	7.6-10	500-750	50	20-30	30	Mid	BC	C	TOC		Spain	EUR	23.57	23.57	12.85	12.85	-10.72	-0.606631	1	Valsain site: 120 yr rotation, 40 year regeneration, thining less than Navafria
881	Moreno-Fernandez	2015.4	Mg ha-1	pool	thin	sawlog	intensive	18	6-20	Scots Pine	C	7.6-10	500-750	50	30-40	40	Deep	BC	C	TOC		Spain	EUR	24.05	24.05	27.14	27.14	3.09	0.120874	1	Navafria site: 100 yr rotation, 20 yr regeneration w/ soil tilling
882	Moreno-Fernandez	2015.4	Mg ha-1	pool	thin	sawlog	intensive	36	21-40	Scots Pine	C	7.6-10	500-750	50	30-40	40	Deep	BC	C	TOC		Spain	EUR	24.05	24.05	10.23	10.23	-13.82	-0.85481	1	Navafria site: 100 yr rotation, 20 yr regeneration w/ soil tilling
883	Moreno-Fernandez	2015.4	Mg ha-1	pool	thin	sawlog	intensive	73	>40	Scots Pine	C	7.6-10	500-750	50	30-40	40	Deep	BC	C	TOC		Spain	EUR	24.05	24.05	10.95	10.95	-13.1	-0.786796	1	Navafria site: 100 yr rotation, 20 yr regeneration w/ soil tilling
884	Moreno-Fernandez	2015.4	Mg ha-1	pool	thin	sawlog	intensive	102	>40	Scots Pine	C	7.6-10	500-750	50	30-40	40	Deep	BC	C	TOC		Spain	EUR	24.05	24.05	22.86	22.86	-1.19	-0.0507463	1	Navafria site: 100 yr rotation, 20 yr regeneration w/ soil tilling
885	Moreno-Fernandez	2015.4	Mg ha-1	pool	thin	sawlog		27	21-40	Scots Pine	C	7.6-10	500-750	50	30-40	40	Deep	BC	C	TOC		Spain	EUR	9.05	9.05	5.95	5.95	-3.1	-0.419374	1	Valsain site: 120 yr rotation, 40 year regeneration, thining less than Navafria
886	Moreno-Fernandez	2015.4	Mg ha-1	pool	thin	sawlog		40	21-40	Scots Pine	C	7.6-10	500-750	50	30-40	40	Deep	BC	C	TOC		Spain	EUR	9.05	9.05	19.05	19.05	10	0.744302	1	Valsain site: 120 yr rotation, 40 year regeneration, thining less than Navafria
887	Moreno-Fernandez	2015.4	Mg ha-1	pool	thin	sawlog		57	>40	Scots Pine	C	7.6-10	500-750	50	30-40	40	Deep	BC	C	TOC		Spain	EUR	9.05	9.05	13.33	13.33	4.28	0.387252	1	Valsain site: 120 yr rotation, 40 year regeneration, thining less than Navafria
888	Moreno-Fernandez	2015.4	Mg ha-1	pool	thin	sawlog		83	>40	Scots Pine	C	7.6-10	500-750	50	30-40	40	Deep	BC	C	TOC		Spain	EUR	9.05	9.05	10	10	0.95	0.0998203	1	Valsain site: 120 yr rotation, 40 year regeneration, thining less than Navafria
889	Moreno-Fernandez	2015.4	Mg ha-1	pool	thin	sawlog		104	>40	Scots Pine	C	7.6-10	500-750	50	30-40	40	Deep	BC	C	TOC		Spain	EUR	9.05	9.05	8.57	8.57	-0.48	-0.054497	1	Valsain site: 120 yr rotation, 40 year regeneration, thining less than Navafria
890	Moreno-Fernandez	2015.4	Mg ha-1	pool	thin	sawlog	intensive	18	6-20	Scots Pine	C	7.6-10	500-750	50	40-50	50	Deep	BC	C	TOC		Spain	EUR	19.28	19.28	23.34	23.34	4.06	0.1911	1	Navafria site: 100 yr rotation, 20 yr regeneration w/ soil tilling
891	Moreno-Fernandez	2015.4	Mg ha-1	pool	thin	sawlog	intensive	36	21-40	Scots Pine	C	7.6-10	500-750	50	40-50	50	Deep	BC	C	TOC		Spain	EUR	19.28	19.28	5	5	-14.28	-1.34963	1	Navafria site: 100 yr rotation, 20 yr regeneration w/ soil tilling
892	Moreno-Fernandez	2015.4	Mg ha-1	pool	thin	sawlog	intensive	73	>40	Scots Pine	C	7.6-10	500-750	50	40-50	50	Deep	BC	C	TOC		Spain	EUR	19.28	19.28	6.9	6.9	-12.38	-1.02755	1	Navafria site: 100 yr rotation, 20 yr regeneration w/ soil tilling
893	Moreno-Fernandez	2015.4	Mg ha-1	pool	thin	sawlog	intensive	102	>40	Scots Pine	C	7.6-10	500-750	50	40-50	50	Deep	BC	C	TOC		Spain	EUR	19.28	19.28	16.19	16.19	-3.09	-0.174675	1	Navafria site: 100 yr rotation, 20 yr regeneration w/ soil tilling
894	Moreno-Fernandez	2015.4	Mg ha-1	pool	thin	sawlog		27	21-40	Scots Pine	C	7.6-10	500-750	50	40-50	50	Deep	BC	C	TOC		Spain	EUR	2.38	2.38	4.77	4.77	2.39	0.695246	1	Valsain site: 120 yr rotation, 40 year regeneration, thining less than Navafria
895	Moreno-Fernandez	2015.4	Mg ha-1	pool	thin	sawlog		40	21-40	Scots Pine	C	7.6-10	500-750	50	40-50	50	Deep	BC	C	TOC		Spain	EUR	2.38	2.38	5.48	5.48	3.1	0.834005	1	Valsain site: 120 yr rotation, 40 year regeneration, thining less than Navafria
896	Moreno-Fernandez	2015.4	Mg ha-1	pool	thin	sawlog		57	>40	Scots Pine	C	7.6-10	500-750	50	40-50	50	Deep	BC	C	TOC		Spain	EUR	2.38	2.38	9.29	9.29	6.91	1.36184	1	Valsain site: 120 yr rotation, 40 year regeneration, thining less than Navafria
897	Moreno-Fernandez	2015.4	Mg ha-1	pool	thin	sawlog		83	>40	Scots Pine	C	7.6-10	500-750	50	40-50	50	Deep	BC	C	TOC		Spain	EUR	2.38	2.38	6.9	6.9	4.52	1.06442	1	Valsain site: 120 yr rotation, 40 year regeneration, thining less than Navafria
898	Moreno-Fernandez	2015.4	Mg ha-1	pool	thin	sawlog		104	>40	Scots Pine	C	7.6-10	500-750	50	40-50	50	Deep	BC	C	TOC		Spain	EUR	2.38	2.38	4.77	4.77	2.39	0.695246	1	Valsain site: 120 yr rotation, 40 year regeneration, thining less than Navafria
899	Sheng	2015.5	Mg ha-1	pool	clearcut		burn	8	6-20	Fir	C	16-20	>1800	100	0-20	20	Top	A	F	CHN	ULT	China	ASIA	35.7	35.7	23.42	23.42	-12.28	-0.42156	1
900	Sheng	2015.5	Mg ha-1	pool	clearcut		burn	8	6-20	Fir	C	16-20	>1800	100	20-40	40	Mid	BC	F	CHN	ULT	China	ASIA	22.7	22.7	15.65	15.65	-7.05	-0.371894	1
901	Sheng	2015.5	Mg ha-1	pool	clearcut		burn	8	6-20	Fir	C	16-20	>1800	100	40-60	60	Deep	BC	F	CHN	ULT	China	ASIA	19.4	19.4	14.8	14.8	-4.6	-0.270646	1
902	Sheng	2015.5	Mg ha-1	pool	clearcut		burn	8	6-20	Fir	C	16-20	>1800	100	60-80	80	V_Deep	BC	F	CHN	ULT	China	ASIA	18.76	18.76	15.86	15.86	-2.9	-0.167927	1
903	Sheng	2015.5	Mg ha-1	pool	clearcut		burn	8	6-20	Fir	C	16-20	>1800	100	80-100	100	V_Deep	BC	F	CHN	ULT	China	ASIA	15.75	15.75	13.06	13.06	-2.69	-0.187286	1
904	Bravo-Oviedo	2015.6	Mg ha-1	pool	thin	sawlog		15	6-20	Scots Pine	C			30	O	0	O	O	C	CHN		Spain	EUR	21.35	21.35	18.85	18.85	-2.5	-0.124539	1	thin-light = C grade (4x thinnings for 10-20% total)
905	Bravo-Oviedo	2015.6	Mg ha-1	pool	thin	sawlog		15	6-20	Scots Pine	C			30	O	0	O	O	C	CHN		Spain	EUR	21.35	21.35	13.93	13.93	-7.42	-0.427007	1	thin-moderate = D grade (4x thinnings for 20-35% total)
906	Bravo-Oviedo	2015.6	Mg ha-1	pool	thin	sawlog		15	6-20	Scots Pine	C			30	0-10	10	Top	A	C	CHN		Spain	EUR	68.66	68.66	55.89	55.89	-12.77	-0.205781	1	thinnings at age stands 50,55,65,& 75
907	Bravo-Oviedo	2015.6	Mg ha-1	pool	thin	sawlog		15	6-20	Scots Pine	C			30	0-10	10	Top	A	C	CHN		Spain	EUR	68.66	68.66	67.13	67.13	-1.53	-0.0225358	1
908	Bravo-Oviedo	2015.6	Mg ha-1	pool	thin	sawlog		15	6-20	Scots Pine	C			30	10-20	20	Mid	BC	C	CHN		Spain	EUR	36.27	36.27	33.72	33.72	-2.55	-0.0728998	1	control age stand = 90 yrs
909	Bravo-Oviedo	2015.6	Mg ha-1	pool	thin	sawlog		15	6-20	Scots Pine	C			30	10-20	20	Mid	BC	C	CHN		Spain	EUR	36.27	36.27	39.95	39.95	3.68	0.0966377	1
910	Bravo-Oviedo	2015.6	Mg ha-1	pool	thin	sawlog		15	6-20	Scots Pine	C			30	20-30	30	Mid	BC	C	CHN		Spain	EUR	17.88	17.88	22.58	22.58	4.7	0.233382	1
911	Bravo-Oviedo	2015.6	Mg ha-1	pool	thin	sawlog		15	6-20	Scots Pine	C			30	20-30	30	Mid	BC	C	CHN		Spain	EUR	17.88	17.88	28.51	28.51	10.63	0.466572	1
912	Puhlick	2016.1	%	conc	clearcut	sawlog			21-40	Mix	C			100	0-10	10	Top	B	C	CHN	SPOD	ME, USA	NE NAM	2.47	2.47	3.32	3.32	0.85	0.295747	1
913	Puhlick	2016.1	%	conc	thin	sawlog			21-40	Mix	C			100	0-10	10	Top	B	C	CHN	SPOD	ME, USA	NE NAM	2.47	2.47	3.88	3.88	1.41	0.451617	1
914	Puhlick	2016.1	%	conc	clearcut	sawlog			21-40	Mix	C			100	10-20	20	Mid	B	C	CHN	SPOD	ME, USA	NE NAM	2.69	2.69	3.19	3.19	0.5	0.17048	1
915	Puhlick	2016.1	%	conc	thin	sawlog			21-40	Mix	C			100	10-20	20	Mid	B	C	CHN	SPOD	ME, USA	NE NAM	2.69	2.69	2.77	2.77	0.08	0.0293061	1
916	Puhlick	2016.1	%	conc	clearcut	sawlog			21-40	Mix	C			100	20-43	43	Deep	B	C	CHN	SPOD	ME, USA	NE NAM	1.58	1.58	1.56	1.56	-0.02	-0.012739	1
917	Puhlick	2016.1	%	conc	thin	sawlog			21-40	Mix	C			100	20-43	43	Deep	B	C	CHN	SPOD	ME, USA	NE NAM	1.58	1.58	1.3	1.3	-0.28	-0.195061	1
918	Puhlick	2016.1	%	conc	clearcut	sawlog			21-40	Mix	C			100	43-100	100	V_Deep	B	C	CHN	SPOD	ME, USA	NE NAM	0.53	0.53	0.24	0.24	-0.29	-0.792238	1
919	Puhlick	2016.1	%	conc	thin	sawlog			21-40	Mix	C			100	43-100	100	V_Deep	B	C	CHN	SPOD	ME, USA	NE NAM	0.53	0.53	0.27	0.27	-0.26	-0.674455	1
920	Puhlick	2016.1	Mg ha-1	pool	clearcut	sawlog			21-40	Mix	C			100	0-100	100	Whole	B	C	CHN	SPOD	ME, USA	NE NAM	45.3	45.3	44.4	44.4	-0.9	-0.0200676	1
921	Puhlick	2016.1	Mg ha-1	pool	thin	sawlog			21-40	Mix	C			100	0-100	100	Whole	B	C	CHN	SPOD	ME, USA	NE NAM	45.3	45.3	51	51	5.7	0.118519	1
922	Chiti	2016.2	Mg ha-1	pool	thin	sawlog		10	6-20	Mix	H	>20	1401-1800	100	O	0	O	O	F	CHN	OX	Ghana	AFR	6.7	6.7	4.2	4.2	-2.5	-0.467023	1	selective =
923	Chiti	2016.2	Mg ha-1	pool	thin	sawlog		18	6-20	Mix	H	>20	1401-1800	100	O	0	O	O	F	CHN	OX	Ghana	AFR	6.7	6.7	4.8	4.8	-1.9	-0.333492	1	1 - 2 trees / ha
924	Chiti	2016.2	Mg ha-1	pool	thin	sawlog		50	>40	Mix	H	>20	1401-1800	100	O	0	O	O	F	CHN	OX	Ghana	AFR	6.7	6.7	6.1	6.1	-0.6	-0.0938188	1
925	Chiti	2016.2	Mg ha-1	pool	thin	sawlog		10	6-20	Mix	H	>20	1001-1400	100	O	0	O	O	F	CHN	ULT	Cameroon	AFR	8.1	8.1	2.9	2.9	-5.2	-1.02715	1	selective =
926	Chiti	2016.2	Mg ha-1	pool	thin	sawlog		30	21-40	Mix	H	>20	1001-1400	100	O	0	O	O	F	CHN	ULT	Cameroon	AFR	8.1	8.1	4	4	-4.1	-0.70557	1	1 - 2 trees / ha
927	Chiti	2016.2	Mg ha-1	pool	thin	sawlog		15	6-20	Mix	H	>20	1001-1400	100	O	0	O	O	F	CHN	ULT	Cameroon	AFR	8.1	8.1	3.3	3.3	-4.8	-0.897942	1
928	Chiti	2016.2	Mg ha-1	pool	thin	sawlog		15	6-20	Mix	H	>20	1401-1800	100	O	0	O	O	F	CHN	OX	Gabon	AFR	7.5	7.5	3.7	3.7	-3.8	-0.70657	1	selective =
929	Chiti	2016.2	Mg ha-1	pool	thin	sawlog		45	>40	Mix	H	>20	1401-1800	100	O	0	O	O	F	CHN	OX	Gabon	AFR	7.5	7.5	3.9	3.9	-3.6	-0.653926	1	1 - 2 trees / ha
930	Chiti	2016.2	Mg ha-1	pool	thin	sawlog		10	6-20	Mix	H	>20	1401-1800	100	0-30	30	Top	A	F	CHN	OX	Ghana	AFR	67.52	67.52	52.52	52.52	-15	-0.25123	1
931	Chiti	2016.2	Mg ha-1	pool	thin	sawlog		18	6-20	Mix	H	>20	1401-1800	100	0-30	30	Top	A	F	CHN	OX	Ghana	AFR	67.52	67.52	51.17	51.17	-16.35	-0.27727	1
932	Chiti	2016.2	Mg ha-1	pool	thin	sawlog		50	>40	Mix	H	>20	1401-1800	100	0-30	30	Top	A	F	CHN	OX	Ghana	AFR	67.52	67.52	48.59	48.59	-18.93	-0.329006	1
933	Chiti	2016.2	Mg ha-1	pool	thin	sawlog		10	6-20	Mix	H	>20	1001-1400	100	0-30	30	Top	BC	F	CHN	ULT	Cameroon	AFR	83.75	83.75	60.79	60.79	-22.96	-0.320411	1
934	Chiti	2016.2	Mg ha-1	pool	thin	sawlog		30	21-40	Mix	H	>20	1001-1400	100	0-30	30	Top	BC	F	CHN	ULT	Cameroon	AFR	83.75	83.75	63.42	63.42	-20.33	-0.278057	1
935	Chiti	2016.2	Mg ha-1	pool	thin	sawlog		15	6-20	Mix	H	>20	1001-1400	100	0-30	30	Top	BC	F	CHN	ULT	Cameroon	AFR	83.75	83.75	47.26	47.26	-36.49	-0.572172	1
936	Chiti	2016.2	Mg ha-1	pool	thin	sawlog		15	6-20	Mix	H	>20	1401-1800	100	0-30	30	Top	A	F	CHN	OX	Gabon	AFR	51.29	51.29	41.5	41.5	-9.79	-0.211802	1
937	Chiti	2016.2	Mg ha-1	pool	thin	sawlog		45	>40	Mix	H	>20	1401-1800	100	0-30	30	Top	A	F	CHN	OX	Gabon	AFR	51.29	51.29	33.16	33.16	-18.13	-0.436151	1
938	Chiti	2016.2	Mg ha-1	pool	thin	sawlog		10	6-20	Mix	H	>20	1401-1800	100	30-100	100	Deep	BC	F	CHN	OX	Ghana	AFR	64.99	64.99	49.74	49.74	-15.25	-0.267424	1
939	Chiti	2016.2	Mg ha-1	pool	thin	sawlog		18	6-20	Mix	H	>20	1401-1800	100	30-100	100	Deep	BC	F	CHN	OX	Ghana	AFR	64.99	64.99	49.73	49.73	-15.26	-0.267625	1
940	Chiti	2016.2	Mg ha-1	pool	thin	sawlog		50	>40	Mix	H	>20	1401-1800	100	30-100	100	Deep	BC	F	CHN	OX	Ghana	AFR	64.99	64.99	52.55	52.55	-12.44	-0.212468	1
941	Chiti	2016.2	Mg ha-1	pool	thin	sawlog		10	6-20	Mix	H	>20	1001-1400	100	30-100	100	Deep	BC	F	CHN	ULT	Cameroon	AFR	72.41	72.41	67.2	67.2	-5.21	-0.0746712	1
942	Chiti	2016.2	Mg ha-1	pool	thin	sawlog		30	21-40	Mix	H	>20	1001-1400	100	30-100	100	Deep	BC	F	CHN	ULT	Cameroon	AFR	72.41	72.41	77.21	77.21	4.8	0.0641846	1
943	Chiti	2016.2	Mg ha-1	pool	thin	sawlog		15	6-20	Mix	H	>20	1001-1400	100	30-100	100	Deep	BC	F	CHN	ULT	Cameroon	AFR	72.41	72.41	56.81	56.81	-15.6	-0.242632	1
944	Chiti	2016.2	Mg ha-1	pool	thin	sawlog		15	6-20	Mix	H	>20	1401-1800	100	30-100	100	Deep	BC	F	CHN	OX	Gabon	AFR	80.65	80.65	46.09	46.09	-34.56	-0.559523	1
945	Chiti	2016.2	Mg ha-1	pool	thin	sawlog		45	>40	Mix	H	>20	1401-1800	100	30-100	100	Deep	BC	F	CHN	OX	Gabon	AFR	80.65	80.65	49.67	49.67	-30.98	-0.484718	1
																21.3169

## Sheet: Pivot
Reference	k	Max Sample Depth
Row Labels	Count of Effect	Average of Max Depth	Average of Effect	Average of PAP_ID	Average of Time
Alban and Perala	7	50	-0.0195485	1992.6	35.4286
Bauhus	6	40	-0.22078	2004.22	9
Bisbing	6	100	-0.90341	2010.1	40
Black and Harden	15	20	0.209442	1995.1	23.4
Boerner	4	10	-0.356781	2006.26	2.25
Borchers and Perry	4	15	-0.0669344	1992.7	14
Bravo-Oviedo	8	30	-0.00702138	2015.6	15
Cade-Menun	12	26	-0.110832	2000.2	5.33333
Carter	8	15	-0.215264	2002.2	1.5
Chatterjee	19	53.6842	0.084459	2009.3	20.7895
Chen	24	100	-0.743019	2013.5	29
Chiti	24	100	-0.40027	2016.2	24.125
Christophel a	6	30	-0.496524	2013.1	15
Christophel b	18	30	-0.296419	2015.2	33
Cromack	1	100	-1.96611	1999.3	10
Dai	3	70	-0.11396	2001.15	14
DeByle	10	5	0.114948	1980.2	3
Deluca and Zouhar	6	8.33333	0.0350762	2000.3	4.66667
Diochon	28	50	-0.490559	2009.1	35.25
Edmonds and McColl	4	20	0.300105	1989.4	3
Edwards	6	45	-0.0600331	1983.4	1
Elliott and Knoepp	3	15	-0.400592	2005.23	3
Ellis	4	10	0.0374972	1982.1	1.5
Ellis and Graley	2	10	-0.130317	1983.1	1
Esquilin	1	10	-0.606136	2008.3	14
Falsone	3	130	0.431361	2012.1	5
Fraterrigo	1	15	0.00258065	2005.18	30
Frazer	4	14	0.0169225	1990.1	12
Gartzia-Bengoetxea	2	5	-0.364554	2009.5	9.5
Gillon	2	0	-0.672492	1999.5	1
Goh and Phillips	4	60	-0.456026	1991.4	2
Goodale and Aber	2	10	0.280349	2001.8	85
Gough	15	80	0.0368106	2007.6	40.8
Grady and Hart	2	15	0.159833	2006.7	12
Grand and LavKulich	6	80	0.174118	2012.2
Gresham	6	30	-0.029437	2002.4	10
Griffiths and Swanson	3	10	-0.0165525	2001.17	20
Gundale	4	10	-0.20403	2005.25	3
Gupta and DeLuca	12	50	-0.644121	2012.3	5.33333
Hart	2	15	-0.747468	2006.27	1
Hendrickson	6	20	0.135133	1989.2	3
Herman	2	9	-0.808902	2003.3	8
Holscher	2	20	-0.925599	2001.9	22
Hwang and Son	2	30	0.08333	2006.8	2
Jang	8	30	-0.369014	2015.1	38
Johnson a	3	20	0.0633549	1991.1	3
Johnson and Todd	6	45	0.0967543	1998.2	15
Johnson b	12		-0.116748	1995.2	6.75
Johnson c	14	53	0.0221722	1997.5	5.5
Johnson d	4	60	-0.141703	2014.5	0.5
Jones	12	30	-0.0309878	2011.1	15
Kaye and Hart	2	15	0.359509	1998.8	1
Keenan	1	20	-0.110542	1994.2	4
Kelliher	4	50	0.112724	2004.19	22
Kishchuk	4	7	-0.156279	2014.1	6
Klockow	9	20	0.0626208	2013.2	1
Klopatek	6	20	0.368241	2002.13	30
Knoepp and Swank	4	30	0.350564	1997.3	32.75
Korb	1	10	-0.26148	2004.21	1
Kraemer	2	10	0.106498	1979.1	26
Kurth	72	30	-0.0111928	2014.6	7.5
Laiho	5	22	0.080496	2003.6	5
Latty	2	15	-0.184049	2004.39	90
Law	12	100	-0.0199683	2002.7	51.6667
Leduc and Rothstein	1	10	-0.0370413	2007.9	5
Maassen and Wirth	2	5	0.130905	2004.4
Mattson and Smith	30	10	-0.254036	1993.3	10.7333
Mattson and Swank	8	60	0.198788	1989.3	5.25
May and Attiwill	2	10	-0.0863136	2003.8	5
McGloughlin and Phillips	2	50	-0.0436434	2006.14	17
McKee	8	60	-0.00693111	2013.3	24
McLaughlin	10	50	-0.198965	1996.5	5
Merino and Edeso	6	15	-0.425184	1999.8	1
Moreno-Fernandez	54	50	-0.0202843	2015.4	60
Mu	18	50	-0.39759	2013.4	5
Murphy	20	60	0.21316	2006.15	1
Neher	3	20	0.119763	2003.25	1.66667
Norris	15	100	-0.0452412	2009.4	15.6667
O'Brien	6	50	-0.0909062	2003.26	18.1667
Powers	20	30	-0.151002	2011.4	13.2
Prest	5	50	-0.126283	2014.4	35
Prietzel	4	0	0.000182176	2004.27	1.25
Puhlick	10	100	-0.0628892	2016.1
Rab	8	10	0.0217154	1996.1	1
Riley and Jones	3	10	-0.362894	2003.14	1
Roaldson	16	20	0.17772	2014.2	5
Rothstein and Spaulding	6	30	-0.0265196	2010.3
Sanchez	6	105	0.199325	2007.12	2
Sanscrainte	4	70	-0.0870912	2003.28
Saynes	8	5	-0.133555	2012.4	10.5
Selig	3	30	0.232764	2008.5	14
Shelburne	4	10	-0.216973	2004.41	1
Sheng	5	100	-0.283863	2015.5	8
Skovsgaard	12	30	-0.0080943	2006.28	0
Slesak	12	60	0.0558407	2012.5	5
Small and McCarthy	3	10	0.0296932	2005.34	7
Stone	1	15	-0.0991685	1999.9	1
Stone and Elioff	4	30	-0.0562624	1998.1	5
Strong	8	40	-0.159374	1997.1	17.5
Strukelj	12	10	0.119568	2015.3	5
Tang	12	60	-0.206069	2009.6	28.5
Trettin	6	150	-0.01061	2011.2	11
Ussiri and Johnson	15	60	0.0603535	2007.16	7.66667
Vario	6	60	-0.095539	2014.3	48.6667
Vesterdal	9	0	-0.399413	1995.8
Waldrop	3	0	0.00715475	2003.18	1
Wu	1	20	-0.607492	2010.2	10
Xiang	8	30	0.101774	2009.2	0.4625
Yanai	35	0	-0.478694	2000.9	29.4
Zabowski	2	20	-0.313741	2008.1	25
Zhong and Makeshin	2	10	-0.103559	2003.19	16
Zummo and Friedland	15	60	-0.081471	2011.3	3
112	945	35.9281

## Sheet: Effect by Depth
group	sub	mean	ci.low	ci.high	n	change	ci.low.tr	ci.high.tr
Overall	Overall	-0.119	-0.152	-0.089	945	-11.219	-14.101	-8.515
Overall	Concentration	0.021	-0.019	0.059	199	2.122	-1.882	6.078
Overall	Pool	-0.156	-0.198	-0.121	746	-14.444	-17.963	-11.397
O Horizon	Overall	-0.36	-0.454	-0.282	258	-30.232	-36.492	-24.573
O Horizon	Concentration	-0.108	-0.184	-0.03	20	-10.237	-16.806	-2.955
O Horizon	Pool	-0.382	-0.488	-0.304	238	-31.75	-38.615	-26.214
Top	Overall	-0.019	-0.048	0.009	372	-1.882	-4.687	0.904
Top	Concentration	0.012	-0.039	0.064	120	1.207	-3.825	6.609
Top	Pool	-0.034	-0.068	-0.002	252	-3.343	-6.574	-0.2
Mid	Overall	-0.04	-0.101	0.019	154	-3.921	-9.607	1.918
Mid	Concentration	0.074	-0.006	0.157	27	7.681	-0.598	17
Mid	Pool	-0.064	-0.138	0.004	127	-6.2	-12.89	0.401
Deep	Overall	-0.031	-0.136	0.071	96	-3.052	-12.716	7.358
Deep	Concentration	0.135	0.063	0.236	24	14.454	6.503	26.617
Deep	Pool	-0.087	-0.218	0.041	72	-8.332	-19.587	4.185
Very Deep	Overall	-0.195	-0.365	-0.026	21	-17.717	-30.58	-2.566
Whole	Overall	-0.009	-0.078	0.064	40	-0.896	-7.504	6.609

## Sheet: Effect by Order
Order	sub	k	mean	ci.low	ci.high	change	ci.low.tr	ci.high.tr
Alfisol	Overall	161	-0.035	-0.106	0.023	-3.43946	-10.0575	2.32665
Alfisol	O Horizon	68	-0.128	-0.275	-0.005	-12.0147	-24.0428	-0.498752
Alfisol	Mineral	93	0.032	-0.026	0.077	3.25175	-2.56649	8.00421
Andisol	Overall	9	0.219	0.004	0.449	24.4831	0.400801	56.6745
Entisol	Overall	10	-0.208	-0.678	-0.013	-18.7793	-49.2369	-1.29159
Inceptisol	Overall	78	-0.236	-0.407	-0.114	-21.0219	-33.4356	-10.7742
Inceptisol	O Horizon	32	-0.605	-0.942	-0.392	-45.3926	-61.0153	-32.4296
Inceptisol	Mineral	46	0.021	-0.084	0.138	2.12221	-8.05687	14.7976
Mollisol	Overall	22	-0.195	-0.411	-0.039	-17.7165	-33.7013	-3.82493
Mollisol	O Horizon	7	-0.484	-0.893	0.011	-38.3687	-59.0574	1.10607
Mollisol	Mineral	15	-0.06	-0.185	0.032	-5.82355	-16.8896	3.25175
Oxisol	Overall	15	-0.37	-0.465	-0.292	-30.9266	-37.1865	-25.3231
Spodosol	Overall	245	-0.211	-0.291	-0.146	-19.0226	-25.2484	-13.5842
Spodosol	O Horizon	79	-0.453	-0.648	-0.321	-36.4282	-47.6909	-27.4577
Spodosol	Mineral	166	-0.095	-0.162	-0.034	-9.06271	-14.9559	-3.34285
Ultisol	Overall	91	-0.284	-0.493	-0.183	-24.7233	-38.9209	-16.7232
Ultisol	O Horizon	15	-1.078	-2.112	-0.654	-65.9725	-87.9004	-48.0038
Ultisol	Mineral	76	-0.127	-0.188	-0.061	-11.9266	-17.1385	-5.91768
Not Specified	Overall	115	-0.044	-0.11	0.027	-4.3046	-10.4166	2.73678
Not Specified	O Horizon	23	-0.128	-0.259	0.012	-12.0147	-22.8177	1.20723
Not Specified	Mineral	92	-0.023	-0.1	0.055	-2.27375	-9.51626	5.65406

## Sheet: Species Differences
Contrast	Depth	k	Mean	CI Low	CI High	Mean Tr	CI Low Tr	CI High Tr
Difference	O Horizon		0.186	0.013	0.396	20.4422	1.30849	48.5869
Conifer/Mix	O Horizon	113	-0.479	-0.689	-0.333	-38.0598	-49.7922	-28.323
Hardwood	O Horizon	125	-0.293	-0.372	-0.214	-25.3978	-31.0646	-19.2652
Difference	Top		0.009	-0.055	0.075	0.904062	-5.35149	7.78842
Conifer/Mix	Top	137	-0.038	-0.092	0.01	-3.72871	-8.78949	1.00502
Hardwood	Top	115	-0.029	-0.072	0.01	-2.85835	-6.94691	1.00502
Difference	Mid		0.026	-0.079	0.137	2.63409	-7.59601	14.6828
Conifer/Mix	Mid	97	-0.071	-0.161	0.016	-6.85381	-14.8708	1.61287
Hardwood	Mid	30	-0.044	-0.109	0.019	-4.3046	-10.327	1.91816
Difference	Deep		-0.094	-0.328	0.15	-8.97172	-27.9637	16.1834
Conifer/Mix	Deep	41	-0.046	-0.271	0.157	-4.4958	-23.7384	16.9996
Hardwood	Deep	31	-0.141	-0.24	-0.031	-13.1511	-21.3372	-3.05244
Difference	Whole		-0.139	-0.277	0.006	-12.9772	-24.1946	0.601804
Conifer/Mix	Whole	19	0.064	-0.067	0.185	6.60924	-6.48048	20.3218
Hardwood	Whole	21	-0.076	-0.138	-0.011	-7.31838	-12.8901	-1.09397

## Sheet: Treatment Differences
Contrast	Sub	Mean Difference	CI Low	CI High	Mean Tr	CI Low Tr	CI High Tr	95% CI
Thin vs Clearcut	Overall	-0.026	-0.1	0.05	-2.56649	-9.51626	5.12711	[-9.5, 5.1]
Thin vs Clearcut	O Horizon	-0.122	-0.302	0.033	-11.4852	-26.0662	3.35505	[-26.1, 3.4]
Thin vs Clearcut	Mineral Soil	0.089	0.016	0.164	9.30807	1.61287	17.8214	[1.6, 17.8]
Bole-only vs Whole Tree Harvest	Overall	0.082	-0.017	0.168	8.54558	-1.68563	18.2937	[-1.7, 18.3]
Bole-only vs Whole Tree Harvest	O Horizon	-0.01	-0.226	0.17	-0.995017	-20.2282	18.5305	[-20.2, 18.5]
Bole-only vs Whole Tree Harvest	Mineral Soil	0.125	0.058	0.193	13.3148	5.9715	21.2883	[6.0, 21.3]
No Pretreatment vs Broadcast Burn	Overall	-0.165	-0.323	-0.034	-15.2106	-27.6026	-3.34285	[-27.6, -3.3]
No Pretreatment vs Broadcast Burn	O Horizon	-0.526	-1.044	-0.132	-40.9036	-64.7956	-12.3659	[-64.8, -12.4]
No Pretreatment vs Broadcast Burn	Mineral Soil	-0.087	-0.165	-0.016	-8.33229	-15.2106	-1.58727	[-15.2, -1.6]
No Pretreatment vs Tillage	Overall	-0.005	-0.172	0.132	-0.498752	-15.8021	14.1108	[-15.8, 14.1]
No Pretreatment vs Tillage	O Horizon	-0.464	-1.31	0.075	-37.1236	-73.018	7.78842	[-73.0, 7.8]
No Pretreatment vs Tillage	Mineral Soil	-0.019	-0.138	0.091	-1.88206	-12.8901	9.5269	[-12.9, 9.5]
No Pretreatment vs Residue Removal	Overall	-0.065	-0.163	0.037	-6.29325	-15.0409	3.7693	[-15.0, 3.8]
No Pretreatment vs Residue Removal	O Horizon	-0.126	-0.32	0.095	-11.8385	-27.3851	9.96589	[-27.4, 10.0]
No Pretreatment vs Residue Removal	Mineral Soil	-0.03	-0.1	0.043	-2.95545	-9.51626	4.39379	[-9.5, 4.4]
No Pretreatment vs Residue Spread	Overall	-0.115	-0.22	-0.008	-10.8634	-19.7481	-0.796809	[-19.8, -0.8]
No Pretreatment vs Residue Spread	O Horizon	-0.02	-0.23	0.215	-1.98013	-20.5466	23.9862	[-20.6, 24.0]
No Pretreatment vs Residue Spread	Mineral Soil	-0.192	-0.312	-0.085	-17.4693	-26.8018	-8.14877	[-26.8, -8.2]
